# Supplementary material for: A complete season with attendance restrictions confirms the relevant contribution of spectators to home advantage and referee bias in association football
Source: PeerJ. 2022 Jul 4;10:e13681. doi: 10.7717/peerj.13681 (PMC9261922; doi:10.7717/peerj.13681)
Supplement: Supplemental Information 1 [file peerj-10-13681-s001.xlsx]

## Sheet: 2020-2021
N	Match	Date	Level	Country	League	Turn	Spectators	Victory_H	Tie	Victory_A	Points_H	Points_A	Goals_H	Goals_A	Possession_H	Possession_A	Shots_H	Shots_A	s_on_goal_H	s_on_goal_A	Corners_H	Corners_A	Fouls_H	Fouls_A	Yellows_H	Yellows_A	Reds_H	Reds_A	P_kicks_against_H	P_kicks_against_A	Extra_time	Result_90'
1	Fulham-Arsenal	2020-09-12	1	1	1	1	0	0	0	1	0	3	0	3	46	54	5	13	2	6	2	3	12	12	2	2	0	0	0	0	3	0-3
2	Crystal Palace-Southampton	2020-09-12	1	1	1	1	0	1	0	0	3	0	1	0	29	71	5	9	3	5	7	3	14	11	2	1	0	0	0	0	6	1-0
3	Liverpool-Leeds	2020-09-12	1	1	1	1	0	1	0	0	3	0	4	3	49	51	22	6	6	3	9	0	9	6	1	0	0	0	0	2	4	4-3
4	West Ham-Newcastle	2020-09-12	1	1	1	1	0	0	0	1	0	3	0	2	58	42	15	15	3	2	8	7	13	7	2	2	0	0	0	0	5	0-2
5	West Bromwich Albion-Leicester	2020-09-13	1	1	1	1	0	0	0	1	0	3	0	3	36	64	7	13	1	7	2	5	12	9	1	1	0	0	2	0	3	0-3
6	Tottenham-Everton	2020-09-13	1	1	1	1	0	0	0	1	0	3	0	1	52	48	9	15	5	4	5	3	15	7	1	0	0	0	0	0	4	0-1
7	Sheffield Utd-Wolves	2020-09-14	1	1	1	1	0	0	0	1	0	3	0	2	55	45	9	11	2	4	12	5	13	7	2	1	0	0	0	0	5	0-2
8	Brighton-Chelsea	2020-09-14	1	1	1	1	0	0	0	1	0	3	1	3	52	48	13	10	3	5	4	3	8	13	1	0	0	0	1	0	4	1-3
9	Everton-West Bromwich Albion	2020-09-19	1	1	1	2	0	1	0	0	3	0	5	2	71	29	17	6	7	4	11	1	9	11	1	0	0	1	0	0	4	5-2
10	Leeds-Fulham	2020-09-19	1	1	1	2	0	1	0	0	3	0	4	3	50	50	10	14	7	6	5	3	13	18	1	2	0	0	1	1	4	4-3
11	Manchester United-Crystal Palace	2020-09-19	1	1	1	2	0	0	0	1	0	3	1	3	76	24	17	14	4	5	9	3	13	10	2	1	0	0	2	0	6	1-3
12	Arsenal-West Ham	2020-09-19	1	1	1	2	0	1	0	0	3	0	2	1	62	38	7	14	3	3	7	5	11	13	0	1	0	0	0	0	4	2-1
13	Southampton-Tottenham	2020-09-20	1	1	1	2	0	0	0	1	0	3	2	5	53	47	14	9	7	6	3	2	17	18	4	3	0	0	0	1	5	2-5
14	Newcastle-Brighton	2020-09-20	1	1	1	2	0	0	0	1	0	3	0	3	47	53	6	13	0	6	7	1	16	15	3	0	0	1	1	0	4	0-3
15	Chelsea-Liverpool	2020-09-20	1	1	1	2	0	0	0	1	0	3	0	2	39	61	5	18	3	6	1	11	10	6	0	0	1	0	0	1	3	0-2
16	Leicester-Burnley	2020-09-20	1	1	1	2	0	1	0	0	3	0	4	2	68	32	14	16	6	5	15	4	11	13	1	2	0	0	0	0	2	4-2
17	Aston Villa-Sheffield Utd	2020-09-21	1	1	1	2	0	1	0	0	3	0	1	0	72	28	18	4	2	1	10	4	12	13	3	1	0	1	1	0	3	1-0
18	Wolves-Manchester City	2020-09-21	1	1	1	2	0	0	0	1	0	3	1	3	35	65	10	14	1	9	4	6	7	8	0	3	0	0	1	0	5	1-2
19	Brighton-Manchester United	2020-09-26	1	1	1	3	0	0	0	1	0	3	2	3	53	47	18	7	5	3	7	1	18	16	4	2	0	0	1	1	10	1-2
20	Crystal Palace-Everton	2020-09-26	1	1	1	3	0	0	0	1	0	3	1	2	42	58	8	10	1	5	7	6	16	15	3	1	0	0	1	0	4	1-2
21	West Bromwich Albion-Chelsea	2020-09-26	1	1	1	3	0	0	1	0	1	1	3	3	24	76	9	22	3	10	3	9	8	16	1	3	0	0	0	0	5	3-2
22	Burnley-Southampton	2020-09-26	1	1	1	3	0	0	0	1	0	3	0	1	53	47	10	5	2	1	8	2	8	10	1	0	0	0	0	0	3	0-1
23	Sheffield Utd-Leeds	2020-09-27	1	1	1	3	0	0	0	1	0	3	0	1	36	64	14	17	4	9	5	7	18	4	2	1	0	0	0	0	5	0-1
24	Tottenham-Newcastle	2020-09-27	1	1	1	3	0	0	1	0	1	1	1	1	66	34	23	6	12	1	10	4	15	9	1	4	0	0	1	0	9	1-0
25	Manchester City-Leicester	2020-09-27	1	1	1	3	0	0	0	1	0	3	2	5	72	28	16	7	5	7	3	3	13	8	1	3	0	0	3	0	4	2-5
26	West Ham-Wolves	2020-09-27	1	1	1	3	0	1	0	0	3	0	4	0	37	63	15	11	7	2	1	3	7	11	0	1	0	0	0	0	4	3-0
27	Fulham-Aston Villa	2020-09-28	1	1	1	3	0	0	0	1	0	3	0	3	65	35	16	12	3	5	5	3	18	14	6	3	0	0	0	0	4	0-3
28	Liverpool-Arsenal	2020-09-28	1	1	1	3	0	1	0	0	3	0	3	1	66	34	21	4	8	3	7	3	11	7	2	2	0	0	0	0	3	3-1
29	Chelsea-Crystal Palace	2020-10-03	1	1	1	4	0	1	0	0	3	0	4	0	71	29	17	4	6	0	8	5	17	13	2	0	0	0	0	2	3	4-0
30	Everton-Brighton	2020-10-03	1	1	1	4	0	1	0	0	3	0	4	2	43	57	11	11	6	3	3	10	13	14	0	1	0	0	0	0	3	4-1
31	Leeds-Manchester City	2020-10-03	1	1	1	4	0	0	1	0	1	1	1	1	52	48	12	23	7	2	7	10	11	12	2	1	0	0	0	0	3	1-1
32	Newcastle-Burnley	2020-10-03	1	1	1	4	0	1	0	0	3	0	3	1	48	52	10	7	5	3	3	4	13	17	2	3	0	0	0	1	4	3-1
33	Leicester-West Ham	2020-10-04	1	1	1	4	0	0	0	1	0	3	0	3	70	30	4	14	0	6	6	4	10	8	2	2	0	0	0	0	5	0-3
34	Southampton-West Bromwich Albion	2020-10-04	1	1	1	4	0	1	0	0	3	0	2	0	62	38	13	5	7	2	5	1	19	10	2	1	0	0	0	0	4	2-0
35	Arsenal-Sheffield Utd	2020-10-04	1	1	1	4	0	1	0	0	3	0	2	1	65	35	6	6	5	2	2	4	3	9	0	1	0	0	0	0	4	2-1
36	Wolves-Fulham	2020-10-04	1	1	1	4	0	1	0	0	3	0	1	0	47	53	14	10	5	2	6	2	15	8	1	1	0	0	0	0	4	1-0
37	Manchester United-Tottenham	2020-10-04	1	1	1	4	0	0	0	1	0	3	1	6	38	62	5	22	2	8	2	4	14	11	2	1	1	0	1	1	3	1-6
38	Aston Villa-Liverpool	2020-10-04	1	1	1	4	0	1	0	0	3	0	7	2	30	70	18	14	11	8	2	7	7	10	2	1	0	0	0	0	3	7-2
39	Everton-Liverpool	2020-10-17	1	1	1	5	0	0	1	0	1	1	2	2	42	58	11	22	5	8	2	5	15	9	3	2	1	0	0	0	6	2-2
40	Chelsea-Southampton	2020-10-17	1	1	1	5	0	0	1	0	1	1	3	3	53	47	11	13	5	6	6	2	11	9	1	1	0	0	0	0	5	3-2
41	Manchester City-Arsenal	2020-10-17	1	1	1	5	0	1	0	0	3	0	1	0	58	42	13	11	5	3	6	6	15	10	4	1	0	0	0	0	4	1-0
42	Newcastle-Manchester United	2020-10-17	1	1	1	5	0	0	0	1	0	3	1	4	36	64	7	28	4	14	0	7	9	12	1	1	0	0	1	0	6	3-1
43	Sheffield Utd-Fulham	2020-10-18	1	1	1	5	0	0	1	0	1	1	1	1	42	58	10	15	6	6	2	5	5	9	0	2	0	0	1	1	5	1-1
44	Crystal Palace-Brighton	2020-10-18	1	1	1	5	0	0	1	0	1	1	1	1	34	66	1	20	1	3	2	5	13	13	3	2	0	1	0	1	10	1-1
45	Tottenham-West Ham	2020-10-18	1	1	1	5	0	0	1	0	1	1	3	3	51	49	11	13	6	4	3	7	13	12	0	5	0	0	0	0	5	3-2
46	Leicester-Aston Villa	2020-10-18	1	1	1	5	0	0	0	1	0	3	0	1	51	49	11	10	5	4	2	7	18	18	4	3	0	0	0	0	4	0-1
47	West Bromwich Albion-Burnley	2020-10-19	1	1	1	5	0	0	1	0	1	1	0	0	57	43	13	9	6	4	8	2	15	17	2	2	0	0	0	0	3	0-0
48	Leeds-Wolves	2020-10-19	1	1	1	5	0	0	0	1	0	3	0	1	68	32	13	7	2	3	8	3	13	12	2	1	0	0	0	0	6	0-1
49	Aston Villa-Leeds	2020-10-23	1	1	1	6	0	0	0	1	0	3	0	3	41	59	12	27	4	9	6	5	14	17	2	2	0	0	0	0	5	3-0
50	West Ham-Manchester City	2020-10-24	1	1	1	6	0	0	1	0	1	1	1	1	30	70	6	14	2	7	2	10	14	6	2	0	0	0	0	0	3	1-1
51	Fulham-Crystal Palace	2020-10-24	1	1	1	6	0	0	0	1	0	3	1	2	64	36	16	14	3	10	4	4	11	11	0	1	1	0	0	0	7	2-0
52	Manchester United-Chelsea	2020-10-24	1	1	1	6	0	0	1	0	1	1	0	0	50	50	14	6	4	1	9	6	8	6	3	1	0	0	0	0	4	0-0
53	Liverpool-Sheffield Utd	2020-10-24	1	1	1	6	0	1	0	0	3	0	2	1	62	38	17	13	5	2	7	3	7	15	0	3	0	0	1	0	3	2-1
54	Southampton-Everton	2020-10-25	1	1	1	6	0	1	0	0	3	0	2	0	54	46	13	6	6	2	4	5	11	11	1	2	0	1	0	0	6	2-0
55	Wolves-Newcastle	2020-10-25	1	1	1	6	0	0	1	0	1	1	1	1	63	37	16	5	3	2	2	3	10	10	0	1	0	0	0	0	3	1-1
56	Arsenal-Leicester	2020-10-25	1	1	1	6	0	0	0	1	0	3	0	1	56	44	12	6	4	2	9	3	13	9	3	5	0	0	0	0	5	0-1
57	Brighton-West Bromwich Albion	2020-10-26	1	1	1	6	0	0	1	0	1	1	1	1	50	50	5	9	3	3	6	2	14	7	2	0	0	0	0	0	3	1-1
58	Burnley-Tottenham	2020-10-26	1	1	1	6	0	0	0	1	0	3	0	1	38	62	13	9	4	3	4	5	9	7	2	0	0	0	0	0	4	0-1
59	Wolves-Crystal Palace	2020-10-30	1	1	1	7	0	1	0	0	3	0	2	0	45	55	15	11	5	2	7	6	13	4	0	2	0	1	0	0	4	2-0
60	Sheffield Utd-Manchester City	2020-10-31	1	1	1	7	0	0	0	1	0	3	0	1	35	65	3	16	1	8	2	5	14	6	0	0	0	0	0	0	3	0-1
61	Burnley-Chelsea	2020-10-31	1	1	1	7	0	0	0	1	0	3	0	3	36	64	5	14	0	9	3	4	10	15	1	0	0	0	0	0	2	0-3
62	Liverpool-West Ham	2020-10-31	1	1	1	7	0	1	0	0	3	0	2	1	72	28	9	4	5	3	1	2	13	14	0	1	0	0	0	1	5	2-1
63	Aston Villa-Southampton	2020-11-01	1	1	1	7	0	0	0	1	0	3	3	4	56	44	19	9	10	4	11	1	12	17	1	2	0	0	0	1	7	1-4
64	Newcastle-Everton	2020-11-01	1	1	1	7	0	1	0	0	3	0	2	1	38	62	11	15	4	4	5	4	9	10	2	4	0	0	0	1	6	2-0
65	Manchester United-Arsenal	2020-11-01	1	1	1	7	0	0	0	1	0	3	0	1	53	47	8	7	2	2	6	3	12	12	3	3	0	0	1	0	4	0-1
66	Tottenham-Brighton	2020-11-01	1	1	1	7	0	1	0	0	3	0	2	1	43	57	9	6	3	2	4	5	14	13	2	1	0	0	0	1	6	2-1
67	Fulham-West Bromwich Albion	2020-11-02	1	1	1	7	0	1	0	0	3	0	2	0	46	54	13	10	6	1	5	2	13	11	3	2	0	0	0	0	4	2-0
68	Leeds-Leicester	2020-11-02	1	1	1	7	0	0	0	1	0	3	1	4	68	32	11	10	4	8	10	3	9	5	1	1	0	0	1	0	4	1-3
69	Brighton-Burnley	2020-11-06	1	1	1	8	0	0	1	0	1	1	0	0	59	41	19	4	3	1	5	3	11	5	1	0	0	0	0	0	3	0-0
70	Southampton-Newcastle	2020-11-06	1	1	1	8	0	1	0	0	3	0	2	0	61	39	15	4	8	2	7	3	12	11	1	2	0	0	0	0	3	2-0
71	Everton-Manchester United	2020-11-07	1	1	1	8	0	0	0	1	0	3	1	3	55	45	7	13	1	5	5	2	12	19	4	2	0	0	0	0	6	1-2
72	Crystal Palace-Leeds	2020-11-07	1	1	1	8	0	1	0	0	3	0	4	1	35	65	10	9	6	3	3	6	9	16	0	2	0	0	0	0	3	4-1
73	Chelsea-Sheffield Utd	2020-11-07	1	1	1	8	0	1	0	0	3	0	4	1	70	30	20	6	9	3	6	7	5	14	0	2	0	0	0	0	3	4-1
74	West Ham-Fulham	2020-11-07	1	1	1	8	0	1	0	0	3	0	1	0	53	47	16	13	7	3	9	5	10	9	2	2	0	0	1	0	9	0-0
75	West Bromwich Albion-Tottenham	2020-11-08	1	1	1	8	0	0	0	1	0	3	0	1	41	59	12	19	2	5	9	6	17	12	1	0	0	0	0	0	5	0-1
76	Leicester-Wolves	2020-11-08	1	1	1	8	0	1	0	0	3	0	1	0	50	50	10	8	3	2	6	3	12	8	2	3	0	0	0	2	6	1-0
77	Manchester City-Liverpool	2020-11-08	1	1	1	8	0	0	1	0	1	1	1	1	55	45	7	10	2	3	1	2	19	11	3	1	0	0	1	1	5	1-1
78	Arsenal-Aston Villa	2020-11-08	1	1	1	8	0	0	0	1	0	3	0	3	59	41	13	15	2	6	3	8	11	13	0	0	0	0	0	0	3	0-3
79	Newcastle-Chelsea	2020-11-21	1	1	1	9	0	0	0	1	0	3	0	2	29	71	8	14	1	3	7	4	11	12	2	0	0	0	0	0	3	0-2
80	Aston Villa-Brighton	2020-11-21	1	1	1	9	0	0	0	1	0	3	1	2	55	45	15	7	4	3	12	3	5	18	2	1	0	1	0	0	7	1-2
81	Tottenham-Manchester City	2020-11-21	1	1	1	9	0	1	0	0	3	0	2	0	34	66	4	22	2	5	0	10	13	19	2	2	0	0	0	0	3	2-0
82	Manchester United-West Bromwich Albion	2020-11-21	1	1	1	9	0	1	0	0	3	0	1	0	63	37	17	7	7	2	8	2	12	7	1	1	0	0	0	1	4	1-0
83	Fullham-Everton	2020-11-22	1	1	1	9	0	0	0	1	0	3	2	3	54	46	14	9	6	7	2	5	14	10	2	0	0	0	0	1	5	2-3
84	Sheffield Utd-West Ham	2020-11-22	1	1	1	9	0	0	0	1	0	3	0	1	51	49	9	15	5	3	2	6	7	6	0	0	0	0	0	0	3	0-1
85	Leeds-Arsenal	2020-11-22	1	1	1	9	0	0	1	0	1	1	0	0	66	34	25	9	4	2	5	3	9	8	3	0	0	1	0	0	7	0-0
86	Liverpool-Leichester	2020-11-22	1	1	1	9	0	1	0	0	3	0	3	0	56	44	24	11	13	4	10	3	15	6	0	2	0	0	0	0	4	3-0
87	Burnley-Crystal Palace	2020-11-23	1	1	1	9	0	1	0	0	3	0	1	0	46	54	10	15	4	5	4	7	13	9	2	0	0	0	0	0	6	1-0
88	Wolves-Southampton	2020-11-23	1	1	1	9	0	0	1	0	1	1	1	1	45	55	20	7	9	2	7	4	14	14	2	0	0	0	0	0	3	1-1
89	Crystal Palace-Newcastle	2020-11-27	1	1	1	10	0	0	0	1	0	3	0	2	57	43	12	14	3	7	7	3	9	10	2	2	0	0	0	0	3	0-2
90	Brighton-Liverpool	2020-11-28	1	1	1	10	0	0	1	0	1	1	1	1	40	60	11	6	3	2	4	3	9	13	2	1	0	0	0	2	8	0-1
91	Manchester City-Brunley	2020-11-28	1	1	1	10	0	1	0	0	3	0	5	0	69	31	19	9	6	1	6	4	12	4	0	0	0	0	0	0	3	5-0
92	Everton-Leeds	2020-11-28	1	1	1	10	0	0	0	1	0	3	0	1	42	58	15	23	8	6	4	2	8	14	1	2	0	0	0	0	4	0-1
93	West Bromwich Albion-Sheffield Utd	2020-11-28	1	1	1	10	0	1	0	0	3	0	1	0	49	51	17	21	6	5	14	9	10	9	2	3	0	0	0	0	7	1-0
94	Southampton-Manchester United	2020-11-29	1	1	1	10	0	0	0	1	0	3	2	3	50	50	10	15	5	6	5	9	12	12	1	0	0	0	0	0	6	2-2
95	Chelsea-Tottenham	2020-11-29	1	1	1	10	0	0	1	0	1	1	0	0	60	40	13	5	3	1	3	3	20	9	4	2	0	0	0	0	4	0-0
96	Arsenal-Wolves	2020-11-29	1	1	1	10	0	0	0	1	0	3	1	2	56	44	13	11	2	5	8	4	13	13	3	4	0	0	0	0	4	1-2
97	Leicester-Fulham	2020-11-30	1	1	1	10	0	0	0	1	0	3	1	2	68	32	16	10	3	5	6	5	9	21	0	2	0	0	1	0	6	1-2
98	West Ham- Aston Villa	2020-11-30	1	1	1	10	0	1	0	0	3	0	2	1	34	66	6	16	2	6	3	7	20	7	1	1	0	0	1	0	8	2-1
99	Burnley-Everton	2020-12-05	1	1	1	11	0	0	1	0	1	1	1	1	41	59	8	13	3	6	8	4	6	9	0	0	0	0	0	0	4	1-1
100	Manchester CIty-Fullham	2020-12-05	1	1	1	11	0	1	0	0	3	0	2	0	69	31	16	6	6	1	9	3	7	6	0	0	0	0	0	1	2	2-0
101	West Ham-Manchester United	2020-12-05	1	1	1	11	2000	0	0	1	0	3	1	3	39	61	19	15	6	6	5	4	9	10	0	0	0	0	0	0	5	1-3
102	Chelsea-Leeds	2020-12-05	1	1	1	11	2000	1	0	0	3	0	3	1	46	54	23	8	11	3	8	4	12	9	0	2	0	0	0	0	5	2-1
103	West Bromwich Albion-Crystal Palace	2020-12-06	1	1	1	11	0	0	0	1	0	3	1	5	50	50	9	18	4	7	4	6	10	16	2	2	1	0	0	0	4	1-5
104	Sheffield United-Leicester	2020-12-06	1	1	1	11	0	0	0	1	0	3	1	2	30	70	4	13	1	4	6	5	13	6	1	3	0	0	0	0	5	1-2
105	Tottenham-Arsenal	2020-12-06	1	1	1	11	2000	1	0	0	3	0	2	0	30	70	5	11	3	2	3	9	16	12	1	2	0	0	0	0	4	2-0
106	Liverpool-Wolves	2020-12-06	1	1	1	11	2000	1	0	0	3	0	4	0	61	39	11	9	6	3	4	6	8	14	1	1	0	0	0	0	3	4-0
107	Brighton-Southampton	2020-12-07	1	1	1	11	2000	0	0	1	0	3	1	2	48	52	12	10	4	3	4	3	12	12	3	3	0	0	1	1	4	1-2
108	Leeds-West Ham	2020-12-11	1	1	1	12	0	0	0	1	0	3	1	2	64	36	13	19	7	8	5	6	12	10	1	2	0	0	0	1	5	1-2
109	Wolves-Aston Villa	2020-12-12	1	1	1	12	0	0	0	1	0	3	0	1	50	50	16	13	7	2	5	8	23	15	4	7	1	1	1	0	7	0-0
110	Newcastle-West Bromwich Albion	2020-12-12	1	1	1	12	0	1	0	0	3	0	2	0	45	55	12	13	7	3	4	3	9	12	2	3	0	0	0	0	6	2-1
111	Manchester United-Manchester City	2020-12-12	1	1	1	12	0	0	1	0	1	1	0	0	46	54	11	9	2	2	4	3	13	6	1	1	0	0	0	0	3	0-0
112	Everton-Chelsea	2020-12-12	1	1	1	12	2000	1	0	0	3	0	1	0	28	72	9	10	4	3	6	6	10	11	2	3	0	0	0	1	5	1-0
113	Southampton-Sheffield Utd	2020-12-13	1	1	1	12	2000	1	0	0	3	0	3	0	68	32	16	3	6	0	8	4	8	14	0	1	0	0	0	0	3	3-0
114	Crystal Palace- Tottenham	2020-12-13	1	1	1	12	2000	0	1	0	1	1	1	1	43	57	16	14	5	6	4	7	15	11	1	1	0	0	0	0	4	1-1
115	Fullham-Liverpool	2020-12-13	1	1	1	12	2000	0	1	0	1	1	1	1	25	75	10	12	5	6	6	8	9	5	3	1	0	0	1	0	4	1-1
116	Arsenal-Burnley	2020-12-13	1	1	1	12	2000	0	0	1	0	3	0	1	65	35	18	10	6	2	13	4	5	11	2	1	1	0	0	0	6	0-1
117	Leicester-Brighton	2020-12-13	1	1	1	12	0	1	0	0	3	0	3	0	54	46	15	12	6	4	9	5	9	10	2	1	0	0	0	0	2	3-0
118	Wolves-Chelsea	2020-12-15	1	1	1	13	0	1	0	0	3	0	2	1	45	55	12	13	4	3	5	6	12	12	2	2	0	0	0	0	8	1-1
119	Manchester City-West Bromwich Albion	2020-12-15	1	1	1	13	0	0	1	0	1	1	1	1	77	23	26	5	7	1	13	2	5	8	2	3	0	0	0	0	4	1-1
120	Arsenal-Southampton	2020-12-16	1	1	1	13	0	0	1	0	1	1	1	1	35	65	9	13	4	3	2	7	13	13	3	3	1	0	0	0	5	1-1
121	Leeds-Newcastle	2020-12-16	1	1	1	13	0	1	0	0	3	0	5	2	69	31	25	10	10	4	7	4	10	13	3	1	0	0	0	0	4	5-2
122	Leicester-Everton	2020-12-16	1	1	1	13	0	0	0	1	0	3	0	2	61	39	14	11	2	6	4	6	12	9	2	3	0	0	0	0	4	0-2
123	Fulham-Brighton	2020-12-16	1	1	1	13	0	0	1	0	1	1	0	0	46	54	9	9	4	4	1	8	15	11	1	0	0	0	0	0	3	0-0
124	Liverpool-Tottenham	2020-12-16	1	1	1	13	2000	1	0	0	3	0	2	1	76	24	17	8	11	2	7	4	8	9	0	2	0	0	0	0	3	2-1
125	West Ham-Crystal Palace	2020-12-16	1	1	1	13	0	0	1	0	1	1	1	1	52	48	9	8	2	2	5	3	8	12	0	1	0	1	0	0	4	1-1
126	Aston Villa-Burnley	2020-12-17	1	1	1	13	0	0	1	0	1	1	0	0	59	41	27	6	7	4	10	1	17	19	1	1	0	0	0	0	2	0-0
127	Sheffield Utd-Manchester United	2020-12-17	1	1	1	13	0	0	0	1	0	3	2	3	40	60	12	15	6	9	6	3	17	8	3	2	0	0	0	0	5	2-3
128	Crystal Palace-Liverpool	2020-12-19	1	1	1	14	0	0	0	1	0	3	0	7	35	65	5	14	3	8	5	4	5	11	1	0	0	0	0	0	1	0-7
129	Southampton-Manchester City	2020-12-19	1	1	1	14	2000	0	0	1	0	3	0	1	48	52	9	11	3	5	6	6	9	11	2	2	0	0	0	0	5	0-1
130	Everton-Arsenal	2020-12-19	1	1	1	14	0	1	0	0	3	0	2	1	42	58	9	13	2	2	4	3	9	9	1	3	0	0	1	0	7	2-1
131	Newcastle-Fulham	2020-12-19	1	1	1	14	0	0	1	0	1	1	1	1	50	50	12	11	5	4	2	9	7	17	1	3	0	1	0	0	6	1-1
132	Brighton-Sheffield Utd	2020-12-20	1	1	1	14	0	0	1	0	1	1	1	1	73	27	21	5	5	3	14	2	9	11	1	5	0	1	0	0	5	1-1
133	Tottenham-Leicester	2020-12-20	1	1	1	14	0	0	0	1	0	3	0	2	56	44	8	17	3	4	5	3	15	14	2	2	0	0	1	0	4	0-2
134	Manchester United-Leeds	2020-12-20	1	1	1	14	0	1	0	0	3	0	6	2	42	58	26	17	14	4	11	13	6	6	1	0	0	0	0	1	3	6-2
135	West Bromwich Albion-Aston Villa	2020-12-20	1	1	1	14	0	0	0	1	0	3	0	3	33	67	1	19	1	10	1	7	14	8	1	2	1	0	1	0	3	0-3
136	Burnley-Wolves	2020-12-21	1	1	1	14	0	1	0	0	3	0	2	1	36	64	10	15	4	3	1	7	11	15	2	1	0	0	1	0	6	2-1
137	Chelsea-West Ham	2020-12-21	1	1	1	14	0	1	0	0	3	0	3	0	54	46	11	6	7	0	5	4	11	6	0	0	0	0	0	0	3	3-0
138	Leicester-Manchester United	2020-12-26	1	1	1	15	0	0	1	0	1	1	2	2	54	46	10	9	2	4	5	0	10	17	2	1	0	0	0	0	4	2-2
139	Aston Villa-Crystal Palace	2020-12-26	1	1	1	15	0	1	0	0	3	0	3	0	39	61	20	13	9	6	4	4	18	16	3	4	1	0	0	0	3	3-0
140	Fulham-Southampton	2020-12-26	1	1	1	15	0	0	1	0	1	1	0	0	47	53	10	3	1	2	6	3	15	12	2	0	0	0	0	0	4	0-0
141	Arsenal-Chelsea	2020-12-26	1	1	1	15	0	1	0	0	3	0	3	1	39	61	15	19	7	3	7	9	13	10	2	1	0	0	1	1	6	3-1
142	Manchester City-Newcastle	2020-12-26	1	1	1	15	0	1	0	0	3	0	2	0	75	25	11	7	6	2	7	3	5	12	2	2	0	0	0	0	3	2-0
143	Sheffield Utd-Everton	2020-12-26	1	1	1	15	0	0	0	1	0	3	0	1	44	56	10	7	2	3	5	3	11	10	2	4	0	0	0	0	6	0-1
144	Leeds-Burnley	2020-12-27	1	1	1	15	0	1	0	0	3	0	1	0	51	49	11	14	4	6	4	12	8	14	0	3	0	0	0	1	4	1-0
145	West Ham-Brighton	2020-12-27	1	1	1	15	0	0	1	0	1	1	2	2	44	56	11	13	4	4	5	4	6	8	0	0	0	0	0	0	4	2-2
146	Liverpool-West Bromwich Albion	2020-12-27	1	1	1	15	2000	0	1	0	1	1	1	1	78	22	17	5	2	3	7	3	8	5	0	1	0	0	0	0	5	1-1
147	Wolves-Tottenham	2020-12-27	1	1	1	15	0	0	1	0	1	1	1	1	55	45	11	6	6	3	9	2	20	13	4	1	0	0	0	0	6	1-1
148	Crystal Palace-Leicester	2020-12-28	1	1	1	16	0	0	1	0	1	1	1	1	33	67	4	17	1	3	2	5	10	7	0	1	0	0	0	0	5	1-1
149	Chelsea-Aston Villa	2020-12-28	1	1	1	16	0	0	1	0	1	1	1	1	63	37	16	10	5	2	11	4	16	3	3	1	0	0	0	0	5	1-1
150	Manchester United-Wolves	2020-12-29	1	1	1	16	0	1	0	0	3	0	1	0	58	42	11	9	3	5	2	2	11	7	1	1	0	0	0	0	6	0-0
151	West Bromwich Albion-Leeds	2020-12-29	1	1	1	16	0	0	0	1	0	3	0	5	24	76	4	14	1	6	3	10	7	10	0	1	0	0	0	0	2	0-5
152	Southampton-West Ham	2020-12-29	1	1	1	16	0	0	1	0	1	1	0	0	63	37	8	8	3	3	4	3	16	15	3	1	0	0	0	0	4	0-0
153	Burnley-Sheffield Utd	2020-12-29	1	1	1	16	0	1	0	0	3	0	1	0	37	63	5	7	3	3	3	5	13	17	1	2	0	0	0	0	5	1-0
154	Brighton-Arsenal	2020-12-29	1	1	1	16	0	0	0	1	0	3	0	1	50	50	13	11	2	3	5	4	11	4	2	0	0	0	0	0	5	0-1
155	Newcastle-Liverpool	2020-12-30	1	1	1	16	0	0	1	0	1	1	0	0	27	73	8	11	2	4	5	12	9	13	2	3	0	0	0	0	4	0-0
156	Everton-West Ham	2020-01-01	1	1	1	17	0	0	0	1	0	3	0	1	60	40	10	11	2	5	5	4	9	7	2	0	0	0	0	0	4	0-1
157	Manchester United-Aston Villa	2020-01-01	1	1	1	17	0	1	0	0	3	0	2	1	48	52	19	15	9	5	5	10	22	10	4	0	0	0	0	1	6	2-1
158	Tottenham-Leeds	2020-01-02	1	1	1	17	0	1	0	0	3	0	3	0	37	63	20	18	7	5	3	5	15	13	4	1	1	0	0	1	3	3-0
159	Crystal Palace-Sheffield Utd	2020-01-02	1	1	1	17	0	1	0	0	3	0	2	0	44	56	9	7	4	2	3	6	8	18	1	3	0	0	0	0	6	2-0
160	Brighton-Wolves	2020-01-02	1	1	1	17	0	0	1	0	1	1	3	3	55	45	13	11	4	4	5	7	13	8	2	1	0	0	1	1	3	3-3
161	West Bromwich Albion-Arsenal	2020-01-02	1	1	1	17	0	0	0	1	0	3	0	4	38	62	7	21	3	12	3	5	7	4	1	2	0	0	0	0	3	0-4
162	Newcastle-Leicester	2020-01-03	1	1	1	17	0	0	0	1	0	3	1	2	43	57	8	9	2	3	3	6	10	11	0	2	0	0	0	0	4	1-2
163	Chelsea-Manchester City	2020-01-03	1	1	1	17	0	0	0	1	0	3	1	3	55	45	9	18	2	6	5	3	11	10	3	1	0	0	0	0	2	0-3
164	Southampton-Liverpool	2020-01-04	1	1	1	17	0	1	0	0	3	0	1	0	33	67	7	17	3	1	1	10	5	12	1	3	0	0	0	0	4	1-0
165	Sheffield Utd-Newcastle	2020-01-12	1	1	1	18	0	1	0	0	3	0	1	0	66	34	17	7	4	3	5	2	13	12	2	3	0	1	0	1	6	1-0
166	Wolves-Everton	2020-01-12	1	1	1	18	0	0	0	1	0	3	1	2	53	47	12	5	3	3	6	5	6	11	2	2	0	0	0	0	5	1-2
167	Burnley-Manchester United	2021-01-12	1	1	1	1 (recovery)	0	0	0	1	0	3	0	1	37	63	11	13	0	7	3	4	15	13	1	2	0	0	0	0	7	0-1
168	Manchester City-Brighton	2020-01-13	1	1	1	18	0	1	0	0	3	0	1	0	65	35	16	5	6	1	8	4	4	12	0	2	0	0	0	1	3	1-0
169	Tottenham-Fulham	2020-01-13	1	1	1	16 (recovery)	0	0	1	0	1	1	1	1	52	48	15	15	6	4	6	5	13	15	1	2	0	0	0	0	4	1-1
170	Arsenal-Crystal Palace	2020-01-14	1	1	1	18	0	0	1	0	1	1	0	0	67	33	11	12	4	2	7	3	11	11	1	1	0	0	0	0	4	0-0
171	Wolves-West Bromwich Albion	2021-01-16	1	1	1	19	0	0	0	1	0	3	2	3	68	32	23	12	6	5	11	0	10	14	2	1	0	0	2	0	4	2-3
172	Leeds-Brighton	2021-01-16	1	1	1	19	0	0	0	1	0	3	0	1	67	33	7	7	2	2	5	2	8	9	1	1	0	0	0	0	3	0-1
173	West Ham-Burnley	2021-01-16	1	1	1	19	0	1	0	0	3	0	1	0	45	55	15	10	4	2	7	4	12	9	2	1	0	0	0	0	4	1-0
174	Fulham-Chelsea	2021-01-16	1	1	1	19	0	0	0	1	0	3	0	1	30	70	10	21	3	6	1	12	11	10	2	3	1	0	0	0	5	0-1
175	Leichester-Southamptom	2021-01-16	1	1	1	19	0	1	0	0	3	0	2	0	47	53	16	8	5	3	2	5	10	11	2	2	0	0	0	0	6	1-0
176	Sheffield Utd-Tottenham	2021-01-17	1	1	1	19	0	0	0	1	0	3	1	3	42	58	15	14	5	5	5	7	13	4	4	0	0	0	0	0	4	1-3
177	Liverpool-Manchester United	2021-01-17	1	1	1	19	0	0	1	0	1	1	0	0	66	34	17	8	3	4	7	3	15	6	2	1	0	0	0	0	4	0-0
178	Manchester City-Crystal Palace	2021-01-17	1	1	1	19	0	1	0	0	3	0	4	0	72	28	13	2	6	0	11	1	9	8	0	0	0	0	0	0	2	4-0
179	Arsenal-Newcastle	2021-01-18	1	1	1	19	0	1	0	0	3	0	3	0	66	34	20	4	6	1	7	2	9	8	0	0	0	0	0	0	3	3-0
180	West Ham-West Bromwich Albion	2021-01-19	1	1	1	18	0	1	0	0	3	0	2	1	59	41	14	6	6	2	3	1	10	10	0	1	0	0	0	0	5	2-1
181	Leichester-Chelsea	2021-01-19	1	1	1	18	0	1	0	0	3	0	2	0	36	64	8	9	6	5	6	3	7	13	1	3	0	0	0	0	3	2-0
182	Manchester City-Aston Villa	2021-01-20	1	1	1	1 (recovery)	0	1	0	0	3	0	2	0	70	30	28	11	9	4	16	2	10	9	0	2	0	0	0	1	4	2-0
183	Fulham-Manchester United	2021-01-20	1	1	1	18	0	0	0	1	0	3	1	2	38	62	12	15	5	5	2	8	6	10	3	1	0	0	0	0	5	1-2
184	Liverpool-Burnley	2021-01-21	1	1	1	18	0	0	0	1	0	3	0	1	72	28	27	6	6	4	12	0	11	8	2	1	0	0	1	0	5	0-1
185	Aston Villa-Newcastle	2021-01-23	1	1	1	11 (recovery)	0	1	0	0	3	0	2	0	60	40	14	7	5	1	4	4	9	18	0	3	0	0	0	0	5	2-0
186	Crystal Palace-West Ham	2021-01-26	1	1	1	20	0	0	0	1	0	3	2	3	54	46	6	17	3	7	3	4	9	8	0	0	0	0	0	0	7	1-3
187	Newcastle-Leeds	2021-01-26	1	1	1	20	0	0	0	1	0	3	1	2	42	58	22	9	5	2	9	4	10	15	1	3	0	0	0	0	4	1-2
188	Southampton-Arsenal	2021-01-26	1	1	1	20	0	0	0	1	0	3	1	3	58	42	13	9	5	5	4	5	11	6	1	2	0	0	0	0	5	1-3
189	West Bromwich Albion-Manchester City	2021-01-26	1	1	1	20	0	0	0	1	0	3	0	5	22	78	4	18	1	7	3	8	8	8	2	0	0	0	0	0	3	0-5
190	Burnley-Aston Villa	2021-01-27	1	1	1	20	0	1	0	0	3	0	3	2	38	62	10	18	5	10	2	4	16	7	1	0	0	0	0	0	4	3-2
191	Chelsea-Wolves	2021-01-27	1	1	1	20	0	0	1	0	1	1	0	0	79	21	14	4	5	0	12	1	14	7	1	1	0	0	0	0	3	0-0
192	Brighton-Fulham	2021-01-27	1	1	1	20	0	0	1	0	1	1	0	0	50	50	16	10	5	3	10	0	10	14	2	1	0	0	0	0	2	0-0
193	Everton-Leicester	2021-01-27	1	1	1	20	0	0	1	0	1	1	1	1	35	65	8	19	2	4	5	11	12	10	1	1	0	0	0	0	4	1-1
194	Manchester United-Sheffield Utd	2021-01-27	1	1	1	20	0	0	0	1	0	3	1	2	76	24	16	5	4	3	7	2	10	12	1	1	0	0	0	0	4	1-2
195	Tottenham-Liverpool	2021-01-28	1	1	1	20	0	0	0	1	0	3	1	3	50	50	3	14	2	7	1	2	9	11	1	2	0	0	0	0	6	1-3
196	Everton-Newcastle	2021-01-30	1	1	1	21	0	0	0	1	0	3	0	2	61	39	11	13	3	3	7	12	13	6	3	4	0	0	0	0	5	0-1
197	Crystal Palace-Wolves	2021-01-30	1	1	1	21	0	1	0	0	3	0	1	0	47	53	11	6	2	4	1	6	7	10	1	2	0	0	0	0	4	1-0
198	Manchester City-Sheffield Utd	2021-01-30	1	1	1	21	0	1	0	0	3	0	1	0	75	25	10	4	5	1	10	0	7	10	0	3	0	0	0	0	5	1-0
199	West Bromwich Albion-Fulham	2021-01-30	1	1	1	21	0	0	1	0	1	1	2	2	37	63	5	12	3	7	2	3	9	10	1	0	0	0	0	0	3	2-2
200	Arsenal-Manchester United	2021-01-30	1	1	1	21	0	0	1	0	1	1	0	0	43	57	17	14	3	3	4	7	9	16	1	3	0	0	0	0	7	0-0
201	Southampton-Aston Villa	2021-01-30	1	1	1	21	0	0	0	1	0	3	0	1	60	40	20	8	5	4	7	1	12	11	1	0	0	0	0	0	8	0-1
202	Chelsea-Burnley	2021-01-31	1	1	1	21	0	1	0	0	3	0	2	0	71	29	19	1	8	0	4	2	7	9	0	1	0	0	0	0	5	2-0
203	Leicester-Leeds	2021-01-31	1	1	1	21	0	0	0	1	0	3	1	3	51	49	18	8	8	7	5	4	17	16	0	3	0	0	0	0	3	1-3
204	West Ham-Liverpool	2021-01-31	1	1	1	21	0	0	0	1	0	3	1	3	33	67	8	14	2	5	6	4	7	8	2	0	0	0	0	0	3	1-3
205	Brighton-Tottenham	2021-01-31	1	1	1	21	0	1	0	0	3	0	1	0	43	57	16	8	5	4	9	2	11	11	2	1	0	0	0	0	4	1-0
206	Sheffield Utd-West Bromwich Albion	2021-02-02	1	1	1	22	0	1	0	0	3	0	2	1	68	32	14	8	6	4	9	2	11	9	2	1	0	0	0	0	4	2-1
207	Wolves-Arsenal	2021-02-02	1	1	1	22	0	1	0	0	3	0	2	1	55	45	11	9	7	3	9	6	11	8	3	2	0	2	0	1	6	2-1
208	Manchester United-Southampton	2021-02-02	1	1	1	22	0	1	0	0	3	0	9	0	75	25	24	3	14	1	5	3	11	6	2	3	0	2	0	1	4	8-0
209	Newcastle-Crystal Palace	2021-02-02	1	1	1	22	0	0	0	1	0	3	1	2	61	39	21	6	5	3	9	1	14	11	1	3	0	0	0	0	5	1-2
210	Burnley-Manchester City	2021-02-03	1	1	1	22	0	0	0	1	0	3	0	2	26	74	2	13	0	6	1	3	8	5	2	1	0	0	0	0	3	0-2
211	Fulham-Leicester	2021-02-03	1	1	1	22	0	0	0	1	0	3	0	2	58	42	8	9	1	5	5	2	17	10	3	1	0	0	0	0	4	0-2
212	Leeds-Everton	2021-02-03	1	1	1	22	0	0	0	1	0	3	1	2	63	37	16	10	7	6	7	1	12	12	2	3	0	0	0	0	5	1-2
213	Aston Villa-West Ham	2021-02-03	1	1	1	22	0	0	0	1	0	3	1	3	56	44	9	20	2	10	7	3	11	16	1	1	0	0	0	0	4	1-3
214	Liverpool-Brighton	2021-02-03	1	1	1	22	0	0	0	1	0	3	0	1	63	37	11	13	1	4	5	3	12	6	1	0	0	0	0	0	4	0-1
215	Tottenham-Chelsea	2021-02-04	1	1	1	22	0	0	0	1	0	3	0	1	42	58	7	16	2	2	2	7	20	14	2	3	0	0	1	0	4	0-1
216	Aston Villa-Arsenal	2021-02-06	1	1	1	23	0	1	0	0	3	0	1	0	34	66	12	14	8	3	3	7	12	12	3	2	0	0	0	0	6	1-0
217	Burnley-Brighton	2021-02-06	1	1	1	23	0	0	1	0	1	1	1	1	55	45	20	12	7	2	8	7	8	10	2	0	0	0	0	0	4	1-1
218	Newcastle-Southampton	2021-02-06	1	1	1	23	0	1	0	0	3	0	3	2	26	74	6	14	4	5	0	7	11	14	4	1	1	0	0	0	7	3-2
219	Fulham-West Ham	2021-02-06	1	1	1	23	0	0	1	0	1	1	0	0	61	39	20	8	2	1	7	3	11	10	1	3	0	1	0	0	9	0-0
220	Manchester United-Everton	2021-02-06	1	1	1	23	0	0	1	0	1	1	3	3	62	38	14	6	5	3	5	1	14	10	2	1	0	0	0	0	6	3-2
221	Tottenham-West Bromwich Albion	2021-02-07	1	1	1	23	0	1	0	0	3	0	2	0	66	34	13	4	6	1	8	0	16	12	1	2	0	0	0	0	5	2-0
222	Wolves-Leicester	2021-02-07	1	1	1	23	0	0	1	0	1	1	0	0	44	56	13	13	1	3	8	2	11	15	1	3	0	0	0	0	4	0-0
223	Liverpool-Manchester City	2021-02-07	1	1	1	23	0	0	0	1	0	3	1	4	56	44	8	8	3	5	6	1	13	8	2	1	0	0	1	1	3	1-4
224	Sheffield Utd-Chelsea	2021-02-07	1	1	1	23	0	0	0	1	0	3	1	2	31	69	8	9	3	3	1	8	8	8	1	0	0	0	1	0	6	1-2
225	Leeds-Crystal Palace	2021-02-08	1	1	1	23	0	1	0	0	3	0	2	0	68	32	17	8	7	3	5	3	7	8	0	2	0	0	0	0	4	2-0
226	Leicester-Liverpool	2021-02-13	1	1	1	24	0	1	0	0	3	0	3	1	38	62	11	15	6	4	2	12	7	6	1	2	0	0	0	0	6	3-1
227	Crystal Palace-Burnley	2021-02-13	1	1	1	24	0	0	0	1	0	3	0	3	53	47	13	16	3	4	7	4	15	14	0	0	0	0	0	0	7	0-3
228	Manchester City-Tottenham	2021-02-13	1	1	1	24	0	1	0	0	3	0	3	0	60	40	15	7	6	3	4	2	12	13	1	3	0	0	0	1	3	3-0
229	Brighton-Aston Villa	2021-02-13	1	1	1	24	0	0	1	0	1	1	0	0	58	42	26	4	9	1	9	2	16	12	2	3	0	0	0	0	3	0-0
230	Southampton-Wolves	2021-02-14	1	1	1	24	0	0	0	1	0	3	1	2	51	49	7	10	3	4	4	6	10	9	2	2	0	0	1	0	6	1-2
231	West Bromwich Albion-Manchester United	2021-02-14	1	1	1	24	0	0	1	0	1	1	1	1	51	49	7	10	3	4	4	6	10	9	5	0	0	0	0	0	5	1-1
232	Arsenal-Leeds	2021-02-14	1	1	1	24	0	1	0	0	3	0	4	2	46	54	13	9	5	5	4	5	8	17	0	2	0	0	0	1	6	4-2
233	Everton-Fulham	2021-02-14	1	1	1	24	0	0	0	1	0	3	0	2	50	50	7	12	2	3	5	4	7	16	1	1	0	0	0	0	7	0-2
234	West Ham-Sheffield Utd	2021-02-15	1	1	1	24	0	1	0	0	3	0	3	0	46	54	13	8	9	5	7	7	11	12	0	2	0	0	0	1	6	2-0
235	Chelsea-Newcastle	2021-02-15	1	1	1	24	0	1	0	0	3	0	2	0	66	34	18	10	6	4	10	5	9	13	0	0	0	0	0	0	3	2-0
236	Burnley-Fulham	2021-02-17	1	1	1	17 (recovery)	0	0	1	0	1	1	1	1	46	54	8	8	3	3	5	5	7	13	1	1	0	0	0	0	4	1-1
237	Everton-Manchester City	2021-02-17	1	1	1	16 (recovery)	0	0	0	1	0	3	1	3	29	71	3	16	2	7	0	10	8	8	2	1	0	0	0	0	3	1-3
238	Wolves-Leeds	2021-02-19	1	1	1	25	0	1	0	0	3	0	1	0	41	59	15	18	5	7	7	9	13	8	1	0	0	0	0	0	6	1-0
239	Southampton-Chelsea	2021-02-20	1	1	1	25	0	0	1	0	1	1	1	1	29	71	4	9	1	3	3	6	10	10	1	1	0	0	1	0	5	1-1
240	Burnley-West Bromwich Albion	2021-02-20	1	1	1	25	0	0	1	0	1	1	0	0	62	38	6	10	1	3	5	5	16	10	3	0	0	1	0	0	4	0-0
241	Liverpool-Everton	2021-02-20	1	1	1	25	0	0	0	1	0	3	0	2	71	29	15	9	6	6	7	2	10	10	2	1	0	0	1	0	6	0-2
242	Fulham-Sheffield Utd	2021-02-20	1	1	1	25	0	1	0	0	3	0	1	0	65	35	15	4	7	2	6	4	11	14	1	2	0	0	0	0	7	1-0
243	West Ham-Tottenham	2021-02-21	1	1	1	25	0	1	0	0	3	0	2	1	31	69	4	20	4	4	5	7	14	7	4	3	0	0	0	0	6	2-1
244	Aston Villa-Leicester	2021-02-21	1	1	1	25	0	0	0	1	0	3	1	2	50	50	11	16	2	7	7	8	11	12	2	1	0	0	0	0	6	1-2
245	Arsenal-Manchester City	2021-02-21	1	1	1	25	0	0	0	1	0	3	0	1	45	55	7	15	1	3	1	3	11	9	2	2	0	0	0	0	5	0-1
246	Manchester United-Newcastle	2021-02-21	1	1	1	25	0	1	0	0	3	0	3	1	72	28	15	10	7	6	6	4	9	11	1	2	0	0	0	1	4	3-1
247	Brighton-Crystal Palace	2021-02-22	1	1	1	25	0	0	0	1	0	3	1	2	75	25	25	3	5	2	13	0	11	6	2	0	0	0	0	0	7	1-1
248	Leeds-Southampton	2021-02-23	1	1	1	18 (recovery)	0	1	0	0	3	0	3	0	47	53	11	13	7	5	2	4	11	13	1	2	0	0	0	0	4	3-0
249	Manchester City-West Ham	2021-02-27	1	1	1	26	0	1	0	0	3	0	2	1	63	37	10	9	3	3	4	2	8	11	1	1	0	0	0	0	4	2-1
250	West Bromwich Albion-Brighton	2021-02-27	1	1	1	26	0	1	0	0	3	0	1	0	30	70	6	15	2	6	7	4	11	13	0	0	0	0	2	0	5	1-0
251	Leeds-Aston Villa	2021-02-27	1	1	1	26	0	0	0	1	0	3	0	1	69	31	13	9	3	4	7	5	14	14	3	2	0	0	0	0	6	0-1
252	Newcastle-Wolves	2021-02-27	1	1	1	26	0	0	1	0	1	1	1	1	48	52	19	14	7	4	3	5	11	13	2	0	0	0	0	0	5	1-1
253	Crystal Palace-Fulham	2021-02-28	1	1	1	26	0	0	1	0	1	1	0	0	40	60	3	16	0	4	1	3	10	14	1	1	0	0	0	0	4	0-0
254	Leicester-Arsenal	2021-02-28	1	1	1	26	0	0	0	1	0	3	1	3	44	56	8	12	3	4	2	7	15	3	2	1	0	0	1	0	7	1-3
255	Tottenham-Burnley	2021-02-28	1	1	1	26	0	1	0	0	3	0	4	0	58	42	16	10	7	3	3	4	6	10	0	0	0	0	1	0	4	4-0
256	Chelsea-Manchester United	2021-02-28	1	1	1	26	0	0	1	0	1	1	0	0	57	43	18	11	6	4	3	4	11	12	1	2	0	0	0	0	3	0-0
257	Sheffield Utd-Liverpool	2021-02-28	1	1	1	26	0	0	0	1	0	3	0	2	39	61	8	16	2	8	4	3	9	9	0	0	0	0	0	0	3	0-2
258	Everton-Southampton	2021-03-01	1	1	1	26	0	1	0	0	3	0	1	0	47	53	7	9	1	1	4	10	13	9	0	2	0	0	0	0	6	1-0
259	Manchester City-Wolves	2021-03-02	1	1	1	29	0	1	0	0	3	0	4	1	72	28	22	6	10	1	10	2	9	5	0	1	0	0	0	0	6	4-1
260	Burnley-Leicester	2021-03-03	1	1	1	29	0	0	1	0	1	1	1	1	39	61	12	16	7	4	5	8	6	12	0	2	0	0	0	0	3	1-1
261	Sheffield Utd-Aston Villa	2021-03-03	1	1	1	29	0	1	0	0	3	0	1	0	28	72	9	16	2	4	2	7	13	6	1	0	1	0	0	0	4	1-0
262	Crystal Palace-Manchester United	2021-03-03	1	1	1	29	0	0	1	0	1	1	0	0	37	63	8	11	2	1	4	6	4	13	1	0	0	0	0	0	3	0-0
263	Fulham-Tottenham	2021-03-04	1	1	1	33	0	0	0	1	0	3	0	1	60	40	11	9	3	2	4	1	13	9	2	1	0	0	0	0	4	0-1
264	West Bromwich Albion-Everton	2021-03-04	1	1	1	29	0	0	0	1	0	3	0	1	48	52	11	11	3	3	3	3	9	7	3	1	0	0	0	0	6	0-1
265	Liverpool-Chelsea	2021-03-04	1	1	1	29	0	0	0	1	0	3	0	1	54	46	7	11	1	5	5	2	9	8	0	0	0	0	0	0	4	0-1
266	Burnley-Arsenal	2021-03-06	1	1	1	27	0	0	1	0	1	1	1	1	41	59	9	15	5	3	2	3	5	12	1	1	0	0	0	0	5	1-1
267	Sheffield Utd-Southampton	2021-03-06	1	1	1	27	0	0	0	1	0	3	0	2	51	49	8	15	2	7	7	3	17	11	4	3	0	0	1	0	4	0-2
268	Aston Villa-Wolves	2021-03-06	1	1	1	27	0	0	1	0	1	1	0	0	49	51	9	10	1	2	5	3	13	13	1	0	0	0	0	0	5	0-0
269	Brighton-Leicester	2021-03-06	1	1	1	27	0	0	0	1	0	3	1	2	37	63	7	8	2	4	6	6	14	8	0	1	0	0	0	0	5	1-2
270	West Bromwich Albion-Newcastle	2021-03-07	1	1	1	27	0	0	1	0	1	1	0	0	53	47	13	9	3	5	9	7	11	10	0	0	0	0	0	0	5	0-0
271	Liverpool-Fulham	2021-03-07	1	1	1	27	0	0	0	1	0	3	0	1	63	37	16	10	3	3	9	4	10	8	2	3	0	0	0	0	6	0-1
272	Manchester City-Manchester United	2021-03-07	1	1	1	27	0	0	0	1	0	3	0	2	66	34	23	8	6	6	6	2	9	12	0	3	0	0	1	0	6	0-2
273	Tottenham-Crystal Palace	2021-03-07	1	1	1	27	0	1	0	0	3	0	4	1	64	36	12	5	5	1	1	5	8	17	2	3	0	0	0	0	5	4-1
274	Chelsea-Everton	2021-03-08	1	1	1	27	0	1	0	0	3	0	2	0	65	35	19	7	9	1	7	3	11	12	0	3	0	0	0	1	4	2-0
275	West Ham-Leeds	2021-03-08	1	1	1	27	0	1	0	0	3	0	2	0	35	65	16	17	5	2	6	6	9	9	1	1	0	0	0	1	3	2-0
276	Manchester City-Southampton	2021-03-10	1	1	1	33	0	1	0	0	3	0	5	2	58	42	17	11	10	6	5	5	6	4	1	0	0	0	1	0	3	5-2
277	Newcastle-Aston Villa	2021-03-12	1	1	1	28	0	0	1	0	1	1	1	1	49	51	12	15	3	6	2	2	10	10	2	3	0	0	0	0	5	0-1
278	Leeds-Chelsea	2021-03-13	1	1	1	28	0	0	1	0	1	1	0	0	38	62	7	15	4	8	8	5	16	6	3	0	0	0	0	0	4	0-0
279	Crystal Palace-West Bromwich Albion	2021-03-13	1	1	1	28	0	1	0	0	3	0	1	0	44	56	6	12	4	1	3	2	16	15	3	1	0	0	0	1	4	1-0
280	Everton-Burnley	2021-03-13	1	1	1	28	0	0	0	1	0	3	1	2	65	35	14	14	4	5	7	4	9	6	0	4	0	0	0	0	4	1-2
281	Fulham-Manchester City	2021-03-13	1	1	1	28	0	0	0	1	0	3	0	3	46	54	3	8	0	7	4	2	14	13	0	0	0	0	1	0	2	0-3
282	Southampton-Brighton	2021-03-14	1	1	1	28	0	0	0	1	0	3	1	2	59	41	9	8	4	6	4	5	11	10	0	0	0	0	0	0	4	1-2
283	Leicester-Sheffield Utd	2021-03-14	1	1	1	28	0	1	0	0	3	0	5	0	72	28	19	1	10	0	9	1	10	9	0	2	0	0	0	0	2	5-0
284	Arsenal-Tottenham	2021-03-14	1	1	1	28	0	1	0	0	3	0	2	1	53	47	13	6	3	3	6	3	12	14	1	4	0	1	0	1	6	2-1
285	Manchester United-West Ham	2021-03-14	1	1	1	28	0	1	0	0	3	0	1	0	62	38	15	7	4	0	6	2	12	2	4	0	0	0	0	0	2	1-0
286	Wolves-Liverpool	2021-03-15	1	1	1	28	0	0	0	1	0	3	0	1	53	47	10	12	5	4	3	2	17	10	2	1	0	0	0	0	8	0-1
287	Fulham-Leeds	2021-03-19	1	1	1	29	0	0	0	1	0	3	1	2	52	48	13	13	6	4	13	7	13	12	2	2	0	0	0	0	5	1-2
288	Brighton-Newcastle	2021-03-20	1	1	1	29	0	1	0	0	3	0	3	0	65	35	11	3	6	1	3	1	12	5	0	1	0	0	0	0	4	3-0
289	West Ham-Arsenal	2021-03-21	1	1	1	29	0	0	1	0	1	1	3	3	37	63	15	16	5	7	3	5	18	8	3	1	0	0	0	0	3	3-3
290	Aston Villa-Tottenham	2021-03-21	1	1	1	18 (recovery)	0	0	0	1	0	3	0	2	50	50	8	9	1	3	5	8	18	13	3	2	0	0	1	0	4	0-2
291	Chelsea-West Bromwich Albion	2021-04-03	1	1	1	30	0	0	0	1	0	3	2	5	66	34	18	14	8	7	10	3	11	6	3	1	1	0	0	0	4	2-4
292	Leeds-Sheffield Utd	2021-04-03	1	1	1	30	0	1	0	0	3	0	2	1	54	46	23	9	8	1	5	7	12	13	1	2	0	0	0	0	6	2-1
293	Leicester-Manchester City	2021-04-03	1	1	1	30	0	0	0	1	0	3	0	2	44	56	5	11	2	4	1	1	13	12	2	3	0	0	0	0	3	0-2
294	Aston Villa-Fulham	2021-04-03	1	1	1	30	0	1	0	0	3	0	3	1	53	47	14	15	4	7	4	4	14	20	1	2	0	0	0	0	4	3-1
295	Southampton-Burnley	2021-04-04	1	1	1	30	0	1	0	0	3	0	3	2	53	47	24	7	9	5	6	7	11	10	0	0	0	0	1	0	3	3-2
296	Newcastle-Tottenham	2021-04-04	1	1	1	30	0	0	1	0	1	1	2	2	41	59	22	11	6	5	7	3	13	14	3	2	0	0	0	0	4	2-2
297	Arsenal-Liverpool	2021-04-04	1	1	1	30	0	0	0	1	0	3	0	3	36	64	3	16	2	7	1	2	10	10	1	1	0	0	0	0	5	0-3
298	Manchester United-Brighton	2021-04-04	1	1	1	30	0	1	0	0	3	0	2	1	58	42	15	5	7	3	5	6	14	7	2	2	0	0	0	0	5	2-1
299	Everton-Crystal Palace	2021-04-05	1	1	1	30	0	0	1	0	1	1	1	1	48	52	15	13	7	6	3	4	10	10	2	0	0	0	0	0	4	1-1
300	Wolves-West Ham	2021-04-05	1	1	1	30	0	0	0	1	0	3	2	3	66	34	20	9	5	6	4	2	9	9	1	4	0	0	0	0	5	2-3
301	Fulham-Wolves	2021-04-09	1	1	1	31	0	0	0	1	0	3	0	1	50	50	14	7	3	3	3	4	11	8	0	0	0	0	0	0	4	0-0
302	Manchester City-Leeds	2021-04-10	1	1	1	31	0	0	0	1	0	3	1	2	71	29	29	2	7	2	9	3	12	15	3	1	0	1	0	0	7	1-1
303	Liverpool-Aston Villa	2021-04-10	1	1	1	31	0	1	0	0	3	0	2	1	66	34	23	9	10	5	7	0	16	11	2	4	0	0	0	0	6	1-1
304	Crystal Palace-Chelsea	2021-04-10	1	1	1	31	0	0	0	1	0	3	1	4	36	64	1	23	1	10	0	8	7	12	1	0	0	0	0	0	2	1-4
305	Burnley-Newcastle	2021-04-11	1	1	1	31	0	0	0	1	0	3	1	2	57	43	24	10	4	5	13	3	11	12	1	0	0	0	0	0	4	1-2
306	West Ham-Leicester	2021-04-11	1	1	1	31	0	1	0	0	3	0	3	2	36	64	4	15	4	5	1	9	7	13	3	3	0	0	0	0	7	3-1
307	Tottenham-Manchester United	2021-04-11	1	1	1	31	0	0	0	1	0	3	1	3	47	53	12	12	3	7	7	5	11	15	1	5	0	0	0	0	7	1-2
308	Sheffield Utd-Arsenal	2021-04-11	1	1	1	31	0	0	0	1	0	3	0	3	45	55	7	14	2	5	2	4	9	6	1	1	0	0	0	0	4	0-3
309	West Bromwich Albion-Southampton	2021-04-12	1	1	1	31	0	1	0	0	3	0	3	0	39	61	15	14	6	4	5	10	12	11	0	1	0	0	0	1	7	3-0
310	Brighton-Everton	2021-04-12	1	1	1	31	0	0	1	0	1	1	0	0	55	45	23	8	3	1	10	3	12	7	1	2	0	0	0	0	2	0-0
311	Everton-Tottenham	2021-04-16	1	1	1	32	0	0	1	0	1	1	2	2	53	47	18	12	7	3	6	3	8	8	1	1	0	0	0	1	4	2-2
312	Newcastle-West Ham	2021-04-17	1	1	1	32	0	1	0	0	3	0	3	2	35	65	16	16	8	6	3	8	9	7	2	2	0	1	1	0	9	3-2
313	Wolves-Sheffield Utd	2021-04-17	1	1	1	32	0	1	0	0	3	0	1	0	48	52	10	8	5	2	3	3	8	15	1	2	0	0	0	0	5	1-0
314	Arsenal-Fulham	2021-04-18	1	1	1	32	0	0	1	0	1	1	1	1	70	30	18	3	5	1	11	1	9	11	0	3	0	0	1	0	9	0-1
315	Manchester United-Burnley	2021-04-18	1	1	1	32	0	1	0	0	3	0	3	1	69	31	17	10	9	3	8	3	9	12	1	2	0	0	0	0	5	3-1
316	Leeds-Liverpool	2021-04-19	1	1	1	32	0	0	1	0	1	1	1	1	62	38	12	17	5	7	10	8	7	15	2	1	0	0	0	0	4	1-1
317	Chelsea-Brighton	2021-04-20	1	1	1	32	0	0	1	0	1	1	0	0	64	36	7	11	4	2	0	3	8	9	2	2	0	1	0	0	4	0-0
318	Tottenham-Southampton	2021-04-21	1	1	1	29 (recovery)	0	1	0	0	3	0	2	1	62	38	12	10	3	5	5	5	10	14	2	1	0	0	0	1	7	2-1
319	Aston Villa-Manchester City	2021-04-21	1	1	1	32	0	0	0	1	0	3	1	2	28	72	8	13	3	3	1	11	12	7	2	1	1	1	0	0	4	1-2
320	Leicester-West Bromwich Albion	2021-04-22	1	1	1	32	0	1	0	0	3	0	3	0	73	27	14	4	7	1	7	3	13	12	0	2	0	0	0	0	3	3-0
321	Arsenal-Everton	2021-04-23	1	1	1	33	0	0	0	1	0	3	0	1	59	41	14	8	3	1	7	3	13	10	1	3	0	0	0	0	5	0-1
322	Liverpool-Newcastle	2021-04-24	1	1	1	33	0	0	1	0	1	1	1	1	69	31	22	7	9	4	6	3	9	7	2	1	0	0	0	0	6	1-0
323	West Ham-Chelsea	2021-04-24	1	1	1	33	0	0	0	1	0	3	0	1	44	56	9	17	2	6	4	2	9	11	0	4	1	0	0	0	6	0-1
324	Sheffield Utd-Brighton	2021-04-24	1	1	1	33	0	1	0	0	3	0	1	0	31	69	7	17	3	4	2	12	13	7	3	0	0	0	0	0	4	1-0
325	Wolves-Burnley	2021-04-25	1	1	1	33	0	0	0	1	0	3	0	4	59	41	12	14	2	7	8	5	8	9	1	2	0	0	0	0	4	0-4
326	Leeds-Manchester United	2021-04-25	1	1	1	33	0	0	1	0	1	1	0	0	44	56	6	16	3	4	2	6	21	11	4	1	0	0	0	0	5	0-0
327	Aston Villa-West Bromwich Albion	2021-04-25	1	1	1	33	0	0	1	0	1	1	2	2	70	30	24	10	11	4	11	4	14	9	0	2	0	0	1	1	5	1-2
328	Leicester-Crystal Palace	2021-04-26	1	1	1	33	0	1	0	0	3	0	2	1	67	33	13	4	5	2	7	2	13	12	0	1	0	0	0	0	4	2-1
329	Southampton-Leicester	2021-04-30	1	1	1	34	0	0	1	0	1	1	1	1	29	71	5	23	3	9	0	10	9	13	1	0	1	0	1	0	5	1-1
330	Crystal Palace-Manchester City	2021-05-01	1	1	1	34	0	0	0	1	0	3	0	2	30	70	9	20	4	3	2	6	9	10	2	0	0	0	0	0	3	0-2
331	Brighton-Leeds	2021-05-01	1	1	1	34	0	1	0	0	3	0	2	0	42	58	17	11	5	2	2	9	17	6	1	1	0	0	1	1	3	2-0
332	Chelsea-Fulham	2021-05-01	1	1	1	34	0	1	0	0	3	0	2	0	49	51	9	10	5	3	1	8	15	8	1	1	0	0	0	0	5	2-0
333	Everton-Aston Villa	2021-05-01	1	1	1	34	0	0	0	1	0	3	1	2	48	52	16	13	3	5	3	6	10	13	0	2	0	0	0	0	4	1-2
334	Newcastle-Arsenal	2021-05-02	1	1	1	34	0	0	0	1	0	3	0	2	38	62	5	19	1	5	3	7	10	9	2	1	1	0	0	0	6	0-2
335	Tottenham-Sheffield Utd	2021-05-02	1	1	1	34	0	1	0	0	3	0	4	0	66	34	20	8	11	1	6	6	8	9	1	1	0	0	0	0	4	4-0
336	West Bromwich Albion-Wolves	2021-05-03	1	1	1	34	0	0	1	0	1	1	1	1	42	58	0	20	4	10	5	6	17	11	2	0	0	0	0	0	5	1-1
337	Burnley-West Ham	2021-05-03	1	1	1	34	0	0	0	1	0	3	1	2	45	55	8	22	3	4	5	4	4	8	2	1	0	0	0	1	4	1-2
338	Leicester-Newcastle	2021-05-07	1	1	1	35	0	0	0	1	0	3	2	4	68	32	25	14	9	6	9	6	12	9	1	1	0	0	0	0	4	2-4
339	Leeds-Tottenham	2021-05-08	1	1	1	35	0	1	0	0	3	0	3	1	53	47	16	11	7	3	8	6	12	10	1	2	0	0	0	0	5	3-1
340	Sheffield Utd-Crystal Palace	2021-05-08	1	1	1	35	0	0	0	1	0	3	0	2	50	50	7	21	0	8	5	11	11	8	1	1	0	0	0	0	4	0-2
341	Manchester City-Chelsea	2021-05-08	1	1	1	35	0	0	0	1	0	3	1	2	48	52	16	12	4	5	6	2	12	10	2	0	0	0	0	1	5	1-1
342	Liverpool-Southampton	2021-05-08	1	1	1	35	0	1	0	0	3	0	2	0	54	46	14	12	6	6	8	4	10	6	0	1	0	0	0	0	5	2-0
343	Wolves-Brighton	2021-05-09	1	1	1	35	0	1	0	0	3	0	2	1	61	39	16	5	6	3	10	5	12	7	2	2	0	1	0	0	7	2-1
344	Aston Villa-Manchester United	2021-05-09	1	1	1	35	0	0	0	1	0	3	1	3	41	59	11	18	5	7	5	6	13	18	3	1	1	0	0	0	7	1-3
345	West Ham-Everton	2021-05-09	1	1	1	35	0	0	0	1	0	3	0	1	69	31	11	9	0	3	5	6	8	10	2	1	0	0	0	0	5	0-1
346	Arsenal-West Bromwich Albion	2021-05-09	1	1	1	35	0	1	0	0	3	0	3	1	66	34	15	12	7	1	6	6	7	9	1	2	0	0	0	0	6	3-1
347	Fulham-Burnley	2021-05-10	1	1	1	35	0	0	0	1	0	3	0	2	68	32	21	14	3	5	8	4	11	10	2	0	0	0	0	0	4	0-2
348	Southampton-Crystal Palace	2021-05-11	1	1	1	32 (recovery)	0	1	0	0	3	0	3	1	63	37	13	11	6	4	12	8	20	13	2	3	0	0	1	0	3	3-1
349	Manchester United-Leicester	2021-05-11	1	1	1	36	0	0	0	1	0	3	1	2	53	47	4	12	1	3	3	4	9	12	0	0	0	0	0	0	3	1-2
350	Chelsea-Arsenal	2021-05-12	1	1	1	36	0	0	0	1	0	3	0	1	68	32	19	5	5	2	9	1	7	6	0	1	0	0	0	0	8	0-1
351	Aston Villa-Everton	2021-05-13	1	1	1	19 (recovery)	0	0	1	0	1	1	0	0	58	42	13	15	2	5	9	1	9	12	2	1	0	0	0	0	8	0-0
352	Manchester United-Liverpool	2021-05-13	1	1	1	34 (recovery)	0	0	0	1	0	3	2	4	53	47	18	17	3	8	6	4	10	12	3	0	0	0	0	0	4	2-4
353	Newcastle-Manchester City	2021-05-14	1	1	1	36	0	0	0	1	0	3	3	4	18	82	11	15	5	6	4	5	11	10	2	2	0	0	1	0	5	3-4
354	Burnley-Leeds	2021-05-15	1	1	1	36	0	0	0	1	0	3	0	4	46	54	11	10	7	3	6	5	9	15	1	1	0	0	0	0	3	0-4
355	Southampton-Fulham	2021-05-15	1	1	1	36	0	1	0	0	3	0	3	1	46	54	11	10	7	3	6	5	9	15	0	1	0	0	0	0	4	3-1
356	Brighton-West Ham	2021-05-15	1	1	1	36	0	0	1	0	1	1	1	1	51	49	10	15	2	3	3	3	7	5	1	0	0	0	0	0	4	1-1
357	Crystal Palace-Aston Villa	2021-05-16	1	1	1	36	0	1	0	0	3	0	3	2	45	55	23	19	8	5	7	7	23	13	3	2	0	0	0	0	5	3-2
358	Tottenham-Wolves	2021-05-16	1	1	1	36	0	1	0	0	3	0	2	0	62	38	24	15	13	3	10	3	8	11	1	0	0	0	0	0	3	2-0
359	West Bromwich Albion-Liverpool	2021-05-16	1	1	1	36	0	0	0	1	0	3	1	2	24	76	9	26	3	6	9	13	7	14	0	0	0	0	0	0	6	1-2
360	Everton-Sheffield Utd	2021-05-16	1	1	1	36	0	0	0	1	0	3	0	1	62	38	16	10	6	3	11	4	8	12	1	3	0	0	0	0	4	0-1
361	Manchester United-Fulham	2021-05-18	1	1	1	37	10000	0	1	0	1	1	1	1	57	43	13	8	6	5	6	1	10	15	2	3	0	0	0	0	4	1-1
362	Southampton-Leeds	2021-05-18	1	1	1	37	7291	0	0	1	0	3	0	2	51	49	18	15	3	7	4	4	10	12	0	3	0	0	0	0	6	0-1
363	Brighton-Manchster City	2021-05-18	1	1	1	37	7945	1	0	0	3	0	3	2	63	37	19	8	6	4	5	3	13	11	3	3	0	1	0	0	6	3-2
364	Chelsea-Leicester	2021-05-18	1	1	1	37	7195	1	0	0	3	0	2	1	59	41	17	7	6	3	6	5	15	16	2	4	0	0	0	1	9	2-1
365	Everton-Wolves	2021-05-19	1	1	1	37	6068	1	0	0	3	0	1	0	41	59	14	9	4	3	7	12	11	11	0	2	0	0	0	0	4	1-0
366	Newcastle-Sheffield Utd	2021-05-19	1	1	1	37	10000	1	0	0	3	0	1	0	51	49	16	11	5	1	5	2	7	7	0	2	0	0	0	0	8	1-0
367	Tottenham-Aston Villa	2021-05-19	1	1	1	37	10000	0	0	1	0	3	1	2	61	39	10	20	4	4	4	5	14	13	1	1	0	0	0	0	6	1-2
368	Crystal Palace-Arsenal	2021-05-19	1	1	1	37	6500	0	0	1	0	3	1	3	31	69	12	6	6	3	6	7	7	7	2	1	0	0	0	0	6	1-1
369	Burnley-Liverpool	2021-05-19	1	1	1	37	3387	0	0	1	0	3	0	3	41	59	10	20	4	6	6	7	10	7	0	0	0	0	0	0	4	0-3
370	West Bromwich Albion-West Ham	2021-05-19	1	1	1	37	5371	0	0	1	0	3	1	3	52	48	14	21	4	9	6	8	8	11	2	2	0	0	1	0	4	1-3
371	Arsenal-Brighton	2021-05-23	1	1	1	38	10000	1	0	0	3	0	2	0	54	46	16	5	5	1	11	3	10	8	0	0	0	0	0	0	2	2-0
372	Aston Villa-Chelsea	2021-05-23	1	1	1	38	10000	1	0	0	3	0	2	1	29	71	6	23	3	7	2	9	11	12	3	4	0	1	0	1	5	2-1
373	Fulham-Newcastle	2021-05-23	1	1	1	38	2000	0	0	1	0	3	0	2	64	36	14	10	0	4	5	4	12	6	1	0	0	0	1	0	1	0-2
374	Leeds-West Bromwich Albion	2021-05-23	1	1	1	38	8000	1	0	0	3	0	3	1	64	36	17	14	9	5	8	3	12	12	2	1	0	0	0	1	5	3-1
375	Leicester-Tottenham	2021-05-23	1	1	1	38	8000	0	0	1	0	3	2	4	47	53	10	11	6	4	8	7	9	8	0	2	0	0	0	2	7	2-3
376	Liverpool-Crystal Palace	2021-05-23	1	1	1	38	9901	1	0	0	3	0	2	0	70	30	19	5	5	4	14	1	10	8	2	2	0	0	0	0	4	2-0
377	Manchester City-Everton	2021-05-23	1	1	1	38	10000	1	0	0	3	0	5	0	68	32	21	8	11	3	7	5	8	10	2	2	0	0	1	0	2	5-0
378	Sheffield Utd-Burnley	2021-05-23	1	1	1	38	4000	1	0	0	3	0	1	0	43	57	12	10	3	3	8	9	11	1	3	1	0	0	0	0	5	1-0
379	West Ham-Southampton	2021-05-23	1	1	1	38	10000	1	0	0	3	0	3	0	37	63	14	17	7	5	2	3	5	9	0	3	0	0	0	0	4	3-0
380	Wolves-Manchester United	2021-05-23	1	1	1	38	4500	0	0	1	0	3	1	2	57	43	14	9	4	4	6	2	14	3	4	1	0	0	1	0	7	1-2
381	SD Eibar-RC Celta	2020-09-12	1	2	2	1	0	0	1	0	1	1	0	0	50	50	8	6	1	3	3	3	17	13	4	3	1	0	0	0	4	0-0
382	Granada CF-Athletic Club	2020-09-12	1	2	2	1	0	1	0	0	3	0	2	0	40	60	4	9	2	2	1	2	8	10	3	4	0	0	0	0	7	2-0
383	Cádiz CF-CA Osasuna	2020-09-12	1	2	2	1	0	0	0	1	0	3	0	2	53	47	12	6	3	4	6	2	14	21	2	2	0	0	0	0	6	0-2
384	D. Alavés-Real Betis	2020-09-13	1	2	2	1	0	0	0	1	0	3	0	1	42	58	7	11	2	4	4	4	19	17	3	3	0	0	0	0	6	0-0
385	Real Valladolid CF-Real Sociedad	2020-09-13	1	2	2	1	0	0	1	0	1	1	1	1	40	60	8	8	3	2	5	3	15	17	4	1	0	0	0	0	5	1-1
386	Villarreal CF-SD Huesca	2020-09-13	1	2	2	1	0	0	1	0	1	1	1	1	66	34	15	10	4	3	6	6	10	22	1	1	0	0	0	1	7	1-1
387	Valencia CF-Levante UD	2020-09-13	1	2	2	1	0	1	0	0	3	0	4	2	44	56	14	19	8	8	3	4	9	14	1	3	0	0	0	0	5	3-2
388	Villarreal-SD Eibar	2020-09-19	1	2	2	2	0	1	0	0	3	0	2	1	58	42	14	12	8	4	4	3	5	12	1	1	0	0	0	0	6	2-1
389	Getafe CF-CA Osasuna	2020-09-19	1	2	2	2	0	1	0	0	3	0	1	0	55	45	6	10	1	3	4	1	19	13	4	2	0	0	0	0	5	1-0
390	RC Celta-Valencia CF	2020-09-19	1	2	2	2	0	1	0	0	3	0	2	1	51	49	23	9	6	3	6	6	12	13	3	1	0	0	0	0	8	2-1
391	SD Huesca-Cádiz CF	2020-09-20	1	2	2	2	0	0	0	1	0	3	0	2	71	29	5	6	1	4	2	1	18	23	3	3	0	0	0	0	8	0-2
392	Real Betis-Real Valladolid CF	2020-09-20	1	2	2	2	0	1	0	0	3	0	2	0	56	44	16	9	6	2	5	3	18	10	3	0	0	0	0	1	5	2-0
393	Granada CF-D. Alavés	2020-09-20	1	2	2	2	0	1	0	0	3	0	2	1	56	44	10	5	3	3	4	4	9	12	0	3	0	0	0	0	7	2-1
394	Real Sociedad-Real Madrid	2020-09-20	1	2	2	2	0	0	1	0	1	1	0	0	32	68	6	16	1	4	1	11	17	12	2	2	0	0	0	0	4	0-0
395	D. Alavés-Getafe CF	2020-09-26	1	2	2	3	0	0	1	0	1	1	0	0	47	53	9	11	0	4	1	5	13	13	2	2	0	0	0	0	3	0-0
396	Valencia CF-SD Huesca	2020-09-26	1	2	2	3	0	0	1	0	1	1	1	1	48	52	5	17	2	4	4	4	14	20	0	1	0	0	0	0	6	1-1
397	Elche CF-Real Sociedad	2020-09-26	1	2	2	3	0	0	0	1	0	3	0	3	40	60	5	27	2	7	2	11	11	12	3	1	0	0	1	0	5	0-2
398	Real Betis-Real Madrid	2020-09-26	1	2	2	3	0	0	0	1	0	3	2	3	46	54	15	11	5	4	8	3	9	10	5	2	1	0	1	0	8	2-3
399	CA Osasuna-Levante UD	2020-09-27	1	2	2	3	0	0	0	1	0	3	1	3	41	59	8	11	4	5	3	7	15	16	2	0	0	0	1	0	4	1-3
400	SD Eibar-Athletic Club	2020-09-27	1	2	2	3	0	0	0	1	0	3	1	2	49	51	7	9	1	5	5	4	15	12	1	0	0	0	0	0	12	1-2
401	Atlético de Madrid-Granada CF	2020-09-27	1	2	2	3	0	1	0	0	3	0	6	1	55	45	17	11	10	6	1	1	16	14	3	2	0	0	0	1	5	5-1
402	Cádiz CF-Sevilla FC	2020-09-27	1	2	2	3	0	0	0	1	0	3	1	3	24	76	12	14	5	5	6	5	9	14	4	2	0	0	0	0	7	1-2
403	Real Valladolid CF-RC Celta	2020-09-27	1	2	2	3	0	0	1	0	1	1	1	1	54	46	10	5	4	1	4	1	26	17	3	4	0	0	0	1	5	1-1
404	FC Barcelona-Villarreal CF	2020-09-27	1	2	2	3	0	1	0	0	3	0	4	0	57	43	17	5	9	1	8	4	9	10	0	1	0	0	0	1	4	4-0
405	Real Sociedad-Valencia CF	2020-09-29	1	2	2	4	0	0	0	1	0	3	0	1	65	35	11	9	3	5	9	3	16	15	1	5	0	0	0	0	7	0-1
406	Getafe CF-Real Betis	2020-09-29	1	2	2	4	0	1	0	0	3	0	3	0	30	70	8	10	4	2	1	4	15	17	4	4	0	1	0	0	3	3-0
407	SD Huesca-Atlético de Madrid	2020-09-30	1	2	2	4	0	0	1	0	1	1	0	0	37	63	9	16	3	2	5	7	13	10	1	0	0	0	0	0	5	0-0
408	Villarreal CF-D. Alavés	2020-09-30	1	2	2	4	0	1	0	0	3	0	3	1	59	41	10	8	6	3	2	0	11	13	0	2	0	0	0	1	5	3-1
409	SD Eibar-Elche CF	2020-09-30	1	2	2	4	0	0	0	1	0	3	0	1	61	39	12	5	4	2	3	2	9	14	2	2	0	0	0	1	4	0-1
410	Real Madrid-Real Valladolid CF	2020-09-30	1	2	2	4	0	1	0	0	3	0	1	0	63	37	15	11	5	5	4	7	11	7	2	1	0	0	0	0	3	1-0
411	Athletic Club-Cádiz CF	2020-10-01	1	2	2	4	0	0	0	1	0	3	0	1	72	28	13	3	4	1	5	2	14	16	3	5	0	2	0	0	9	0-1
412	Sevilla FC-Levante UD	2020-10-01	1	2	2	4	0	1	0	0	3	0	1	0	65	35	16	3	2	1	2	4	14	17	6	2	0	0	0	0	5	0-0
413	RC Celta-FC Barcelona	2020-10-01	1	2	2	4	0	0	0	1	0	3	0	3	44	56	10	7	3	4	3	8	22	10	5	5	0	1	0	0	6	0-2
414	Real Valladolid CF-SD Eibar	2020-10-03	1	2	2	5	0	0	0	1	0	3	1	2	53	47	9	11	3	5	3	4	11	21	2	3	0	1	1	1	7	1-2
415	Atlético de Madrid-Villarreal CF	2020-10-03	1	2	2	5	0	0	1	0	1	1	0	0	54	46	13	6	1	2	9	1	11	7	1	2	0	0	0	0	4	0-0
416	Real Sociedad-Getafe CF	2020-10-03	1	2	2	5	0	1	0	0	3	0	3	0	53	47	11	5	6	1	5	5	21	13	3	3	0	0	0	1	4	3-0
417	Elche CF-SD Huesca	2020-10-03	1	2	2	5	0	0	1	0	1	1	0	0	51	49	2	18	0	4	0	5	8	26	0	2	0	0	0	0	2	0-0
418	Valencia CF-Real Betis	2020-10-03	1	2	2	5	0	0	0	1	0	3	0	2	47	53	5	17	2	8	4	7	11	14	2	2	0	0	0	0	3	0-2
419	CA Osasuna-RC Celta	2020-10-04	1	2	2	5	0	1	0	0	3	0	2	0	39	61	13	9	5	3	6	5	19	10	3	3	0	0	0	0	4	2-0
420	D. Alavés-Athletic Club	2020-10-04	1	2	2	5	0	1	0	0	3	0	1	0	41	59	8	8	3	0	0	6	20	17	2	3	1	0	0	0	6	1-0
421	Levante UD-Real Madrid	2020-10-04	1	2	2	5	0	0	0	1	0	3	0	2	45	55	11	13	4	3	4	7	14	8	2	1	0	0	0	0	5	0-1
422	Cádiz CF-Granada CF	2020-10-04	1	2	2	5	0	0	1	0	1	1	1	1	42	58	14	13	4	5	2	5	16	16	2	2	0	0	0	0	8	1-1
423	FC Barcelona-Sevilla FC	2020-10-04	1	2	2	5	0	0	1	0	1	1	1	1	54	46	12	13	5	1	6	5	11	18	1	1	0	0	0	0	5	1-1
424	Granada CF-Sevilla FC	2020-10-17	1	2	2	6	0	1	0	0	3	0	1	0	51	49	13	8	3	3	5	1	16	11	4	4	0	1	0	0	5	1-0
425	RC Celta-Atlético de Madrid	2020-10-17	1	2	2	6	0	0	0	1	0	3	0	2	52	48	15	9	5	4	8	4	16	18	3	4	0	0	0	0	7	0-1
426	Real Madrid-Cádiz CF	2020-10-17	1	2	2	6	0	0	0	1	0	3	0	1	75	25	14	14	2	5	5	11	7	5	2	0	0	0	0	0	4	0-1
427	Getafe CF-FC Barcelona	2020-10-17	1	2	2	6	0	1	0	0	3	0	1	0	28	72	9	7	4	1	7	2	20	10	4	3	0	0	0	1	7	1-0
428	SD Eibar-CA Osasuna	2020-10-18	1	2	2	6	0	0	1	0	1	1	0	0	53	47	10	8	6	2	6	7	14	14	2	3	0	1	0	0	3	0-0
429	Athletic Club-Levante UD	2020-10-18	1	2	2	6	0	1	0	0	3	0	2	0	52	48	14	6	5	1	9	3	11	10	3	1	0	0	0	0	4	2-0
430	Villarreal CF-Valencia CF	2020-10-18	1	2	2	6	0	1	0	0	3	0	2	1	62	38	16	11	6	3	3	7	13	8	4	1	1	0	0	1	7	2-1
431	D. Alavés-Elche CF	2020-10-18	1	2	2	6	0	0	0	1	0	3	0	2	47	53	13	7	2	3	2	6	11	11	2	5	0	0	0	0	4	0-2
432	SD Huesca-Real Valladolid CF	2020-10-18	1	2	2	6	0	0	1	0	1	1	2	2	66	34	12	5	7	3	3	1	14	24	1	2	0	0	0	0	3	2-2
433	Real Betis-Real Sociedad	2020-10-18	1	2	2	6	0	0	0	1	0	3	0	3	56	44	7	8	1	5	6	2	11	18	2	1	0	0	0	0	7	0-3
434	Elche CF-Valencia CF	2020-10-23	1	2	2	7	0	1	0	0	3	0	2	1	47	53	3	14	2	4	0	7	15	8	3	2	0	0	0	0	6	2-1
435	FC Barcelona-Real Madrid	2020-10-24	1	2	2	7	0	0	0	1	0	3	1	3	52	48	10	15	4	9	7	7	11	13	3	2	0	0	1	0	5	1-3
436	CA Osasuna-Athletic Club	2020-10-24	1	2	2	7	0	1	0	0	3	0	1	0	40	60	7	13	2	5	2	5	18	10	3	2	0	0	0	1	4	1-0
437	Sevilla FC-SD Eibar	2020-10-24	1	2	2	7	0	0	0	1	0	3	0	1	72	28	21	3	3	1	13	3	11	12	0	3	0	0	0	0	5	0-1
438	Atlético de Madrid-Real Betis	2020-10-24	1	2	2	7	0	1	0	0	3	0	2	0	40	60	13	12	6	3	8	5	19	12	2	0	0	1	0	0	4	1-0
439	Real Valladolid CF-D. Alavés	2020-10-25	1	2	2	7	0	0	0	1	0	3	0	2	44	56	5	14	1	4	2	4	9	7	1	0	1	0	1	0	4	0-2
440	Cádiz CF-Villarreal CF	2020-10-25	1	2	2	7	0	0	1	0	1	1	0	0	23	77	5	7	0	2	0	5	14	7	2	2	0	0	0	0	4	0-0
441	Getafe CF-Granada CF	2020-10-25	1	2	2	7	0	0	0	1	0	3	0	1	66	34	10	5	1	2	6	1	19	23	4	2	0	0	1	0	8	0-1
442	Real Sociedad-SD Huesca	2020-10-25	1	2	2	7	0	1	0	0	3	0	4	1	52	48	13	7	6	4	4	5	12	11	2	1	0	0	0	1	3	4-1
443	Levante UD-RC Celta	2020-10-26	1	2	2	7	0	0	1	0	1	1	1	1	59	41	10	11	3	3	3	2	11	19	2	2	0	0	0	1	5	1-1
444	SD Eibar-Cádiz CF	2020-10-30	1	2	2	8	0	0	0	1	0	3	0	2	73	27	9	6	3	4	7	2	10	10	1	1	0	0	0	0	3	0-2
445	Real Madrid-SD Huesca	2020-10-31	1	2	2	8	0	1	0	0	3	0	4	1	59	41	13	9	6	2	6	3	16	9	0	2	0	0	0	0	3	4-1
446	Athletic Club-Sevilla FC	2020-10-31	1	2	2	8	0	1	0	0	3	0	2	1	46	54	16	7	5	3	6	1	17	19	5	5	0	0	0	0	4	2-1
447	CA Osasuna-Atlético de Madrid	2020-10-31	1	2	2	8	0	0	0	1	0	3	1	3	45	55	8	11	3	6	3	2	12	10	1	2	0	0	2	0	5	1-3
448	D. Alavés-FC Barcelona	2020-10-31	1	2	2	8	0	0	1	0	1	1	1	1	21	79	4	25	3	9	2	14	16	4	4	3	1	0	0	0	5	1-1
449	Real Betis-Elche CF	2020-11-01	1	2	2	8	0	1	0	0	3	0	3	1	60	40	17	4	10	2	1	1	13	12	2	1	0	0	0	1	5	3-1
450	RC Celta-Real Sociedad	2020-11-01	1	2	2	8	0	0	0	1	0	3	1	4	46	54	9	9	2	7	2	3	19	16	2	5	1	0	0	1	3	1-4
451	Granada CF-Levante UD	2020-11-01	1	2	2	8	0	0	1	0	1	1	1	1	28	72	5	19	2	4	2	8	7	14	2	3	1	0	0	0	5	1-1
452	Valencia CF-Getafe CF	2020-11-01	1	2	2	8	0	0	1	0	1	1	2	2	38	62	9	16	5	5	0	3	18	25	8	5	1	1	0	1	11	1-1
453	Villarreal CF-Real Valladolid CF	2020-11-02	1	2	2	8	0	1	0	0	3	0	2	0	60	40	11	11	5	1	6	4	13	13	1	3	0	0	0	0	4	2-0
454	Elche CF-RC Celta	2020-11-06	1	2	2	9	0	0	1	0	1	1	1	1	51	49	8	14	1	6	3	3	18	12	3	5	0	0	0	1	6	1-1
455	SD Huesca-SD Eibar	2020-11-07	1	2	2	9	0	0	1	0	1	1	1	1	59	41	14	8	6	3	4	3	16	30	2	0	0	0	0	0	5	1-1
456	FC Barcelona-Real Betis	2020-11-07	1	2	2	9	0	1	0	0	3	0	5	2	59	41	18	12	9	6	9	5	8	10	2	2	0	1	0	2	6	5-2
457	Sevilla FC-CA Osasuna	2020-11-07	1	2	2	9	0	1	0	0	3	0	1	0	67	33	9	10	1	2	3	0	11	19	2	3	0	0	0	1	3	1-0
458	Atlético de Madrid-Cádiz CF	2020-11-07	1	2	2	9	0	1	0	0	3	0	4	0	68	32	17	10	7	3	2	7	10	9	1	1	0	0	0	0	4	4-0
459	Getafe CF-Villarreal CF	2020-11-08	1	2	2	9	0	0	0	1	0	3	1	3	44	56	13	9	5	5	3	3	18	11	3	4	0	0	0	0	4	1-3
460	Real Sociedad-Granada CF	2020-11-08	1	2	2	9	0	1	0	0	3	0	2	0	73	27	22	2	9	1	15	0	8	11	2	1	1	0	1	2	5	2-0
461	Levante UD-D. Alavés	2020-11-08	1	2	2	9	0	0	1	0	1	1	1	1	72	28	17	6	5	2	12	1	12	16	1	6	0	1	0	0	6	1-1
462	Real Valladolid CF-Athletic Club	2020-11-08	1	2	2	9	0	1	0	0	3	0	2	1	30	70	7	17	4	2	2	11	23	11	4	2	0	0	1	1	5	2-1
463	Valencia CF-Real Madrid	2020-11-08	1	2	2	9	0	1	0	0	3	0	4	1	35	65	7	16	4	6	1	8	13	14	3	2	0	0	0	3	6	4-1
464	CA Osasuna-SD Huesca	2020-11-20	1	2	2	10	0	0	1	0	1	1	1	1	55	45	18	6	7	5	4	3	14	15	2	3	0	0	0	0	4	1-1
465	Levante UD-Elche CF	2020-11-21	1	2	2	10	0	0	1	0	1	1	1	1	44	56	13	11	5	5	5	4	15	11	1	4	0	0	0	0	5	1-1
466	Villarreal CF-Real Madrid	2020-11-21	1	2	2	10	0	0	1	0	1	1	1	1	47	53	13	6	1	1	4	2	16	14	1	2	0	0	0	1	4	1-1
467	Sevilla FC-RC Celta	2020-11-21	1	2	2	10	0	1	0	0	3	0	4	2	57	43	15	10	10	7	3	2	14	20	2	2	0	0	0	0	3	4-2
468	Atlético de Madrid-FC Barcelona	2020-11-21	1	2	2	10	0	1	0	0	3	0	1	0	46	54	9	13	2	4	8	8	12	6	4	0	0	0	0	0	5	1-0
469	SD Eibar-Getafe CF	2020-11-22	1	2	2	10	0	0	1	0	1	1	0	0	51	49	14	8	5	3	3	5	16	22	3	4	1	0	0	0	6	0-0
470	Cádiz CF-Real Sociedad	2020-11-22	1	2	2	10	0	0	0	1	0	3	0	1	32	68	2	14	0	4	1	6	14	14	2	1	0	0	0	0	3	0-1
471	Granada CF-Real Valladolid CF	2020-11-22	1	2	2	10	0	0	0	1	0	3	1	3	60	40	16	9	6	3	5	3	16	14	4	3	0	0	0	0	5	1-3
472	D. Alavés-Valencia CF	2020-11-22	1	2	2	10	0	0	1	0	1	1	2	2	34	66	13	13	3	5	4	5	21	16	1	1	0	0	0	1	8	2-2
473	Athletic Club-Real Betis	2020-11-23	1	2	2	10	0	1	0	0	3	0	4	0	40	60	14	7	9	1	6	3	16	8	0	0	0	0	0	0	2	4-0
474	Real Valladolid CF-Levante UD	2020-11-27	1	2	2	11	0	0	1	0	1	1	1	1	35	65	10	10	4	3	3	11	18	11	0	3	0	0	1	0	3	1-1
475	Elche CF-Cádiz CF	2020-11-28	1	2	2	11	0	0	1	0	1	1	1	1	47	53	4	6	3	2	1	9	16	15	6	2	1	0	0	0	5	1-1
476	Valencia CF-Atlético de Madrid	2020-11-28	1	2	2	11	0	0	0	1	0	3	0	1	33	67	5	14	2	6	2	7	12	15	2	5	0	0	0	0	4	0-1
477	SD Huesca-Sevilla FC	2020-11-28	1	2	2	11	0	0	0	1	0	3	0	1	32	68	5	16	1	4	1	10	14	9	4	3	0	0	0	0	4	0-1
478	Real Madrid-D. Alavés	2020-11-28	1	2	2	11	0	0	0	1	0	3	1	2	68	32	20	11	9	6	12	9	8	17	2	3	0	0	1	0	6	1-2
479	FC Barcelona-CA Osasuna	2020-11-29	1	2	2	11	0	1	0	0	3	0	4	0	72	28	20	10	11	5	5	3	8	12	1	0	0	0	0	0	3	4-0
480	Getafe CF-Athletic Club	2020-11-29	1	2	2	11	0	0	1	0	1	1	1	1	52	48	11	5	3	2	3	2	16	23	2	4	0	0	0	0	4	1-1
481	RC Celta-Granada CF	2020-11-29	1	2	2	11	0	1	0	0	3	0	3	1	68	32	17	9	8	2	8	1	14	13	5	3	1	0	0	0	8	3-1
482	Real Sociedad-Villarreal CF	2020-11-29	1	2	2	11	0	0	1	0	1	1	1	1	55	45	8	10	4	2	4	5	18	12	5	3	0	0	1	1	6	1-1
483	Real Betis-SD Eibar	2020-11-30	1	2	2	11	0	0	0	1	0	3	0	2	63	37	7	11	3	6	6	2	13	14	2	1	0	0	2	0	5	0-2
484	Athletic Club-RC Celta	2020-12-04	1	2	2	12	0	0	0	1	0	3	0	2	50	50	10	6	0	4	4	5	7	15	2	1	0	0	0	0	3	0-2
485	Levante UD-Getafe CF	2020-12-05	1	2	2	12	0	1	0	0	3	0	3	0	69	31	12	9	8	0	5	5	12	13	2	7	0	2	0	0	3	3-0
486	Sevilla FC-Real Madrid	2020-12-05	1	2	2	12	0	0	0	1	0	3	0	1	63	37	12	10	2	3	4	2	15	20	1	3	0	0	0	0	3	0-1
487	Atlético de Madrid-Real Valladolid CF	2020-12-05	1	2	2	12	0	1	0	0	3	0	2	0	54	46	14	13	4	3	4	4	10	10	4	2	0	0	0	0	4	2-0
488	Cádiz CF-FC Barcelona	2020-12-05	1	2	2	12	0	1	0	0	3	0	2	1	18	82	7	21	3	8	5	13	10	7	0	2	0	0	0	0	6	2-1
489	Granada CF-SD Huesca	2020-12-06	1	2	2	12	0	0	1	0	1	1	3	3	48	52	15	16	6	7	4	2	12	16	2	0	0	0	0	0	4	3-3
490	CA Osasuna-Real Betis	2020-12-06	1	2	2	12	0	0	0	1	0	3	0	2	47	53	10	12	0	5	2	6	16	12	3	2	0	0	0	0	3	0-1
491	Villarreal CF-Elche CF	2020-12-06	1	2	2	12	0	0	1	0	1	1	0	0	57	43	12	3	3	0	4	0	16	13	3	2	0	0	0	0	4	0-0
492	D. Alavés-Real Sociedad	2020-12-06	1	2	2	12	0	0	1	0	1	1	0	0	32	68	5	13	1	5	2	3	3	11	1	0	1	0	0	0	3	0-0
493	SD Eibar-Valencia CF	2020-12-07	1	2	2	12	0	0	1	0	1	1	0	0	64	36	19	6	3	4	8	0	15	10	3	2	0	0	0	0	5	0-0
494	Real Valladolid CF-CA Osasuna	2020-12-11	1	2	2	13	0	1	0	0	3	0	3	2	47	53	11	13	6	6	3	3	14	18	4	5	0	0	0	1	6	3-2
495	Valencia CF-Athletic Club	2020-12-12	1	2	2	13	0	0	1	0	1	1	2	2	40	60	11	13	2	5	0	10	19	16	2	6	0	0	1	1	5	2-2
496	Getafe CF-Sevilla FC	2020-12-12	1	2	2	13	0	0	0	1	0	3	0	1	25	75	8	8	2	0	5	3	14	13	2	3	0	0	0	0	5	0-1
497	SD Huesca-D. Alavés	2020-12-12	1	2	2	13	0	1	0	0	3	0	1	0	67	33	11	3	3	1	5	2	14	20	1	4	0	0	0	0	5	1-0
498	Real Madrid-Atlético de Madrid	2020-12-12	1	2	2	13	0	1	0	0	3	0	2	0	57	43	11	5	3	1	3	6	7	16	1	3	0	0	0	0	4	2-0
499	Real Sociedad-SD Eibar	2020-12-13	1	2	2	13	0	0	1	0	1	1	1	1	49	51	8	16	2	4	5	4	14	11	4	3	0	0	0	0	6	1-1
500	Real Betis-Villarreal CF	2020-12-13	1	2	2	13	0	0	1	0	1	1	1	1	47	53	11	7	5	2	4	8	13	14	2	3	0	0	0	0	3	1-1
501	Elche CF-Granada CF	2020-12-13	1	2	2	13	0	0	0	1	0	3	0	1	68	32	9	13	1	5	6	5	16	15	4	2	0	0	0	0	5	0-1
502	FC Barcelona-Levante UD	2020-12-13	1	2	2	13	0	1	0	0	3	0	1	0	63	37	24	6	13	3	12	4	4	15	2	1	0	0	0	0	6	1-0
503	RC Celta-Cádiz CF	2020-12-14	1	2	2	13	0	1	0	0	3	0	4	0	61	39	7	12	4	2	1	5	24	9	2	1	0	0	0	1	4	4-0
504	Real Madrid-Athletic Club	2020-12-15	1	2	2	19	0	1	0	0	3	0	3	1	68	32	18	10	5	4	6	6	8	9	1	3	0	1	0	0	3	2-1
505	FC Barcelona-Real Sociedad	2020-12-16	1	2	2	19	0	1	0	0	3	0	2	1	54	46	14	12	4	5	2	3	18	14	3	3	0	0	0	0	5	2-1
506	Athletic Club-SD Huesca	2020-12-18	1	2	2	14	0	1	0	0	3	0	2	0	54	46	10	6	3	1	5	5	9	16	0	3	0	1	0	1	5	1-0
507	Atlético de Madrid-Elche CF	2020-12-19	1	2	2	14	0	1	0	0	3	0	3	1	48	52	12	8	6	3	2	5	13	14	1	2	0	0	0	1	5	3-1
508	FC Barcelona-Valencia CF	2020-12-19	1	2	2	14	0	0	1	0	1	1	2	2	73	27	25	11	9	4	8	3	10	14	4	2	0	0	0	1	4	2-2
509	Levante UD-Real Sociedad	2020-12-19	1	2	2	14	0	1	0	0	3	0	2	1	45	55	13	15	5	5	3	4	19	14	2	1	0	0	0	0	4	2-1
510	CA Osasuna-Villarreal CF	2020-12-19	1	2	2	14	0	0	0	1	0	3	1	3	32	68	6	13	1	6	2	2	17	16	2	2	1	0	0	1	4	1-3
511	Sevilla FC-Real Valladolid CF	2020-12-19	1	2	2	14	0	0	1	0	1	1	1	1	59	41	14	12	3	5	7	7	13	10	3	4	0	0	0	1	5	1-1
512	RC Celta-D. Alavés	2020-12-20	1	2	2	14	0	1	0	0	3	0	2	0	55	45	11	8	3	2	3	5	18	12	2	2	0	0	0	0	3	2-0
513	Granada CF-Real Betis	2020-12-20	1	2	2	14	0	1	0	0	3	0	2	0	31	69	8	14	3	1	1	10	21	16	3	4	0	0	0	1	4	2-0
514	Cádiz CF-Getafe CF	2020-12-20	1	2	2	14	0	0	0	1	0	3	0	2	61	39	8	6	1	4	2	4	8	23	2	7	0	0	0	0	6	0-1
515	SD Eibar-Real Madrid	2020-12-20	1	2	2	14	0	0	0	1	0	3	1	3	34	66	10	11	3	5	4	4	11	7	1	0	0	0	0	0	3	1-2
516	Valencia CF-Sevilla FC	2020-12-22	1	2	2	15	0	0	0	1	0	3	0	1	30	70	10	19	4	3	3	5	11	17	3	2	0	0	0	0	3	0-1
517	Elche CF-CA Osasuna	2020-12-22	1	2	2	15	0	0	1	0	1	1	2	2	66	34	7	15	2	6	4	4	8	17	1	2	0	1	0	0	4	2-2
518	SD Huesca-Levante UD	2020-12-22	1	2	2	15	0	0	1	0	1	1	1	1	54	46	11	9	2	1	10	3	10	17	2	3	0	0	0	1	4	1-1
519	Real Sociedad-Atlético de Madrid	2020-12-22	1	2	2	15	0	0	0	1	0	3	0	2	59	41	6	8	1	3	5	5	20	17	3	3	0	0	0	0	3	0-2
520	Real Valladolid CF-FC Barcelona	2020-12-22	1	2	2	15	0	0	0	1	0	3	0	3	39	61	12	21	5	10	4	6	12	10	1	2	0	0	0	0	4	0-3
521	Villarreal CF-Athletic Club	2020-12-22	1	2	2	15	0	0	1	0	1	1	1	1	66	34	17	9	6	3	6	4	10	18	1	1	0	0	0	0	4	1-1
522	Getafe CF-RC Celta	2020-12-23	1	2	2	15	0	0	1	0	1	1	1	1	38	62	6	2	3	1	1	4	17	16	3	3	0	0	1	0	4	1-1
523	Real Madrid-Granada CF	2020-12-23	1	2	2	15	0	1	0	0	3	0	2	0	67	33	23	10	6	1	8	1	13	11	2	1	0	0	0	0	5	1-0
524	D. Alavés-SD Eibar	2020-12-23	1	2	2	15	0	1	0	0	3	0	2	1	44	56	13	8	3	4	2	7	10	14	4	2	0	0	0	0	6	2-1
525	Real Betis-Cádiz CF	2020-12-23	1	2	2	15	0	1	0	0	3	0	1	0	72	28	6	6	1	3	5	5	18	9	1	1	0	0	0	0	5	1-0
526	Sevilla FC-Villarreal CF	2020-12-29	1	2	2	16	0	1	0	0	3	0	2	0	43	57	10	6	3	2	4	7	13	14	1	4	0	0	0	1	4	2-0
527	FC Barcelona-SD Eibar	2020-12-29	1	2	2	16	0	0	1	0	1	1	1	1	73	27	16	9	5	3	5	7	6	15	0	2	0	0	0	1	5	1-1
528	Cádiz CF-Real Valladolid CF	2020-12-29	1	2	2	16	0	0	1	0	1	1	0	0	35	65	8	7	3	1	2	6	14	13	3	2	0	0	0	0	3	0-0
529	Levante UD-Real Betis	2020-12-29	1	2	2	16	0	1	0	0	3	0	4	3	38	62	10	19	5	7	3	6	9	14	3	2	1	0	1	0	6	4-3
530	Granada CF-Valencia CF	2020-12-30	1	2	2	16	0	1	0	0	3	0	2	1	53	47	24	16	5	6	6	6	16	15	4	4	1	2	0	0	7	2-1
531	Atlético de Madrid-Getafe CF	2020-12-30	1	2	2	16	0	1	0	0	3	0	1	0	51	49	10	10	3	2	5	2	7	12	2	3	0	0	0	0	4	1-0
532	RC Celta-SD Huesca	2020-12-30	1	2	2	16	0	1	0	0	3	0	2	1	57	43	15	17	6	6	0	5	19	8	2	0	0	0	0	0	7	2-1
533	Elche CF-Real Madrid	2020-12-30	1	2	2	16	0	0	1	0	1	1	1	1	32	68	6	14	3	6	2	3	8	18	1	4	0	0	0	1	3	1-1
534	Athletic Club-Real Sociedad	2020-12-31	1	2	2	16	0	0	0	1	0	3	0	1	61	39	4	13	0	3	2	4	23	18	5	4	0	0	0	0	4	0-1
535	CA Osasuna-D. Alavés	2020-12-31	1	2	2	16	0	0	1	0	1	1	1	1	32	68	8	15	3	1	6	4	12	9	3	4	1	0	1	0	4	1-1
536	Villarreal CF-Levante UD	2021-01-02	1	2	2	17	0	1	0	0	3	0	2	1	50	50	12	9	7	2	3	5	12	11	1	1	0	0	0	0	3	2-1
537	Real Betis-Sevilla FC	2021-01-02	1	2	2	17	0	0	1	0	1	1	1	1	45	55	16	6	3	2	2	1	15	18	5	2	0	0	0	2	4	1-1
538	Getafe CF-Real Valladolid CF	2021-01-02	1	2	2	17	0	0	0	1	0	3	0	1	53	47	11	8	4	2	5	9	13	13	3	2	0	0	0	0	6	0-1
539	Real Madrid-RC Celta	2021-01-02	1	2	2	17	0	1	0	0	3	0	2	0	41	59	9	6	2	1	1	5	14	14	4	2	0	0	0	0	4	2-0
540	Athletic Club-Elche CF	2021-01-03	1	2	2	17	0	1	0	0	3	0	1	0	49	51	13	5	2	2	5	4	15	13	2	1	0	0	0	0	4	1-0
541	D. Alavés-Atlético de Madrid	2021-01-03	1	2	2	17	0	0	0	1	0	3	1	2	41	59	4	8	1	4	1	5	14	12	0	2	1	0	0	0	6	1-2
542	SD Eibar-Granada CF	2021-01-03	1	2	2	17	0	1	0	0	3	0	2	0	56	44	15	6	7	3	4	2	10	9	2	1	0	0	0	1	4	2-0
543	Real Sociedad-CA Osasuna	2021-01-03	1	2	2	17	0	0	1	0	1	1	1	1	62	38	8	6	2	2	7	2	15	8	1	1	0	0	0	0	4	1-1
544	SD Huesca-FC Barcelona	2021-01-03	1	2	2	17	0	0	0	1	0	3	0	1	31	69	4	20	4	7	2	6	12	11	1	0	0	0	0	0	2	0-1
545	Valencia CF-Cádiz CF	2021-01-04	1	2	2	17	0	0	1	0	1	1	1	1	71	29	11	9	4	2	9	7	11	17	2	2	0	0	0	0	4	1-1
546	Athletic Club-FC Barcelona	2021-01-06	1	2	2	2 (recovery)	0	0	0	1	0	3	2	3	43	57	8	13	3	9	3	4	10	6	2	1	0	0	0	0	4	2-3
547	RC Celta-Villarreal CF	2021-01-08	1	2	2	18	0	0	0	1	0	3	0	4	57	43	8	15	3	6	3	4	15	18	1	0	0	0	0	0	2	0-4
548	Sevilla FC-Real Sociedad	2021-01-09	1	2	2	18	0	1	0	0	3	0	3	2	60	40	12	10	7	4	2	9	8	18	0	3	0	0	0	0	3	3-2
549	Granada CF-FC Barcelona	2021-01-09	1	2	2	18	0	0	0	1	0	3	0	4	28	72	8	13	4	4	4	1	16	3	2	3	1	0	0	0	2	0-4
550	CA Osasuna-Real Madrid	2021-01-09	1	2	2	18	0	0	1	0	1	1	0	0	30	70	8	9	2	1	2	4	9	3	0	0	0	0	0	0	4	0-0
551	Levante UD-SD Eibar	2021-01-10	1	2	2	18	0	1	0	0	3	0	2	1	54	46	4	17	2	4	4	9	12	8	2	0	0	0	0	0	4	2-1
552	Cádiz CF-D. Alavés	2021-01-10	1	2	2	18	0	1	0	0	3	0	3	1	39	61	10	5	7	2	4	1	17	10	1	4	0	1	1	0	3	3-1
553	Elche CF-Getafe CF	2021-01-11	1	2	2	18	0	0	0	1	0	3	1	3	46	54	7	14	4	7	1	7	14	16	4	2	1	0	1	0	5	1-3
554	Real Valladolid CF-Valencia CF	2021-01-10	1	2	2	18	0	0	0	1	0	3	0	1	42	58	11	17	4	6	0	4	14	14	2	3	0	0	0	0	7	0-1
555	SD Huesca-Real Betis	2021-01-11	1	2	2	18	0	0	0	1	0	3	0	2	49	51	10	15	3	5	3	6	12	13	2	2	0	1	0	0	6	0-1
556	Atlético de Madrid-Sevilla FC	2021-01-12	1	2	2	1 (recovery)	0	1	0	0	3	0	2	0	34	66	5	13	4	2	3	12	14	11	2	0	0	0	0	0	4	2-0
557	Granada CF-CA Osasuna	2021-01-12	1	2	2	4 (recovery)	0	1	0	0	3	0	2	0	40	60	10	15	2	3	4	4	16	17	1	4	0	0	0	0	4	2-0
558	Cádiz CF-Levante UD	2021-01-19	1	2	2	19	0	0	1	0	1	1	2	2	30	70	8	8	2	5	5	2	13	11	2	1	0	0	0	0	5	2-2
559	Real Valladolid CF-Elche CF	2021-01-19	1	2	2	19	0	0	1	0	1	1	2	2	62	38	13	9	2	3	4	5	14	19	1	3	0	0	0	0	6	2-2
560	D. Alavés-Sevilla FC	2021-01-19	1	2	2	19	0	0	0	1	0	3	1	2	37	63	12	7	3	3	3	2	15	14	3	3	0	0	0	1	6	1-2
561	Getafe CF-SD Huesca	2021-01-20	1	2	2	19	0	1	0	0	3	0	1	0	48	52	12	15	5	3	3	8	15	14	2	3	0	0	0	0	7	1-0
562	Real Betis-RC Celta	2021-01-20	1	2	2	19	0	1	0	0	3	0	2	1	42	58	12	10	4	3	5	6	13	16	2	3	0	0	0	0	5	2-1
563	Villarreal CF-Granada CF	2021-01-20	1	2	2	19	0	0	1	0	1	1	2	2	69	31	8	3	3	2	3	0	11	11	2	4	0	1	0	2	6	2-2
564	Valencia CF-CA Osasuna	2021-01-21	1	2	2	19	0	0	1	0	1	1	1	1	64	36	10	14	3	5	9	4	8	17	1	3	0	0	0	0	4	1-1
565	SD Eibar-Atlético de Madrid	2021-01-21	1	2	2	19	0	0	0	1	0	3	1	2	35	65	12	9	2	4	3	3	24	9	3	2	0	0	1	1	5	1-2
566	Levante UD-Real Valladolid CF	2021-01-22	1	2	2	20	0	0	1	0	1	1	2	2	58	42	11	7	3	3	8	2	16	12	0	1	0	0	0	0	3	2-2
567	SD Huesca-Villarreal CF	2021-01-23	1	2	2	20	0	0	1	0	1	1	0	0	44	56	5	8	1	2	1	2	9	15	3	1	0	0	0	0	3	0-0
568	Sevilla FC-Cádiz CF	2021-01-23	1	2	2	20	0	1	0	0	3	0	3	0	80	20	15	9	7	3	7	6	12	6	1	3	0	0	0	0	4	3-0
569	Real Sociedad-Real Betis	2021-01-23	1	2	2	20	0	0	1	0	1	1	2	2	53	47	12	7	6	4	8	3	14	13	2	2	0	0	0	0	5	2-1
570	D. Alavés-Real Madrid	2021-01-23	1	2	2	20	0	0	0	1	0	3	1	4	39	61	14	10	4	7	4	4	16	7	5	3	0	0	0	0	2	1-4
571	CA Osasuna-Granada CF	2021-01-24	1	2	2	20	0	1	0	0	3	0	3	1	49	51	7	12	4	1	1	5	15	15	5	4	1	0	0	0	7	3-1
572	Elche CF-FC Barcelona	2021-01-24	1	2	2	20	0	0	0	1	0	3	0	2	35	65	4	15	2	8	0	7	15	9	0	2	0	0	0	0	3	0-2
573	RC Celta-SD Eibar	2021-01-24	1	2	2	20	0	0	1	0	1	1	1	1	56	44	8	9	4	2	0	6	10	16	4	3	0	0	0	0	2	1-1
574	Atlético de Madrid-Valencia CF	2021-01-24	1	2	2	20	0	1	0	0	3	0	3	1	49	51	14	8	5	4	7	7	11	14	2	0	0	0	0	0	4	3-1
575	Athletic Club-Getafe CF	2021-01-25	1	2	2	20	0	1	0	0	3	0	5	1	52	48	11	6	8	2	4	4	13	18	4	4	0	0	1	0	3	5-1
576	Real Valladolid CF-SD Huesca	2021-01-29	1	2	2	21	0	0	0	1	0	3	1	3	55	45	14	11	4	5	6	7	12	12	2	2	0	0	0	0	4	0-3
577	SD Eibar-Sevilla FC	2021-01-30	1	2	2	21	0	0	0	1	0	3	0	2	50	50	17	7	6	4	6	2	10	12	4	3	0	0	1	0	5	0-2
578	Real Madrid-Levante UD	2021-01-30	1	2	2	21	0	0	0	1	0	3	1	2	47	53	8	14	2	8	3	7	9	20	1	2	1	0	1	0	5	1-2
579	Valencia CF-Elche CF	2021-01-30	1	2	2	21	0	1	0	0	3	0	1	0	45	55	14	10	4	1	4	10	18	15	1	7	0	0	0	1	5	1-0
580	Villarreal CF-Real Sociedad	2021-01-30	1	2	2	21	0	0	1	0	1	1	1	1	35	65	4	12	2	3	1	7	10	17	1	3	0	0	0	0	4	1-0
581	Getafe CF-D. Alavés	2021-01-31	1	2	2	21	0	0	1	0	1	1	0	0	60	40	6	5	1	1	5	2	20	19	3	3	0	0	0	0	4	0-0
582	Cádiz CF-Atlético de Madrid	2021-01-31	1	2	2	21	0	0	0	1	0	3	2	4	48	52	11	9	6	4	2	2	7	7	1	5	0	0	1	0	4	2-4
583	Granada CF-RC Celta	2021-01-31	1	2	2	21	0	0	1	0	1	1	0	0	35	65	10	7	5	1	6	5	16	19	2	4	0	0	0	0	2	0-0
584	FC Barcelona-Athletic Club	2021-01-31	1	2	2	21	0	1	0	0	3	0	2	1	59	41	12	7	6	2	7	3	12	20	2	3	0	0	0	0	4	2-1
585	Real Betis-CA Osasuna	2021-02-01	1	2	2	21	0	1	0	0	3	0	1	0	65	35	8	15	4	5	3	4	12	6	1	1	0	0	0	0	3	1-0
586	D. Alavés-Real Valladolid CF	2021-02-05	1	2	2	22	0	1	0	0	3	0	1	0	55	45	20	3	5	1	11	1	11	17	4	4	0	0	0	0	5	1-0
587	Levante UD-Granada CF	2021-02-06	1	2	2	22	0	0	1	0	1	1	2	2	60	40	11	11	7	5	6	2	12	13	1	3	0	0	0	0	6	2-1
588	SD Huesca-Real Madrid	2021-02-06	1	2	2	22	0	0	0	1	0	3	1	2	34	66	13	18	2	7	3	10	18	9	2	1	0	0	0	0	4	1-2
589	Elche CF-Villarreal CF	2021-02-06	1	2	2	22	0	0	1	0	1	1	2	2	45	55	8	9	2	4	4	2	17	5	1	2	0	0	0	0	5	2-2
590	Sevilla FC-Getafe CF	2021-02-06	1	2	2	22	0	1	0	0	3	0	3	0	77	23	18	4	5	1	3	1	10	11	1	4	0	1	0	0	9	3-0
591	Real Sociedad-Cádiz CF	2021-02-07	1	2	2	22	0	1	0	0	3	0	4	1	75	25	17	2	6	1	5	1	7	7	0	2	0	1	0	1	4	4-1
592	Athletic Club-Valencia CF	2021-02-07	1	2	2	22	0	0	1	0	1	1	1	1	50	50	11	15	2	2	6	6	10	8	2	1	0	0	0	0	4	1-1
593	CA Osasuna-SD Eibar	2021-02-07	1	2	2	22	0	1	0	0	3	0	2	1	54	46	12	12	4	3	2	1	10	11	0	0	0	0	0	0	4	2-1
594	Real Betis-FC Barcelona	2021-02-07	1	2	2	22	0	0	0	1	0	3	2	3	36	64	8	12	5	4	3	5	21	7	1	3	0	0	0	0	4	2-3
595	Atlético de Madrid-RC Celta	2021-02-08	1	2	2	22	0	0	1	0	1	1	2	2	45	55	9	7	2	2	1	4	12	17	2	2	0	0	0	0	3	2-2
596	Real Madrid-Getafe CF	2021-02-09	1	2	2	1 (recovery)	0	1	0	0	3	0	2	0	68	32	14	1	4	0	8	1	8	16	1	1	0	0	0	0	2	2-0
597	RC Celta-Elche CF	2021-02-12	1	2	2	23	0	1	0	0	3	0	3	1	50	50	9	7	6	2	3	6	11	15	3	2	0	0	0	0	4	3-1
598	Granada CF-Atlético de Madrid	2021-02-13	1	2	2	23	0	0	0	1	0	3	1	2	39	61	6	10	1	4	7	3	14	20	0	5	0	0	0	0	3	1-2
599	Sevilla FC-SD Huesca	2021-02-13	1	2	2	23	0	1	0	0	3	0	1	0	66	34	14	9	4	5	6	6	14	15	3	4	0	0	0	0	3	1-0
600	SD Eibar-Real Valladolid CF	2021-02-13	1	2	2	23	0	0	1	0	1	1	1	1	54	46	14	5	2	1	7	3	15	12	2	3	0	0	1	0	4	1-1
601	FC Barcelona-D. Alavés	2021-02-13	1	2	2	23	0	1	0	0	3	0	5	1	74	26	17	6	9	2	5	4	10	14	0	2	0	0	0	0	1	5-1
602	Getafe CF-Real Sociedad	2021-02-14	1	2	2	23	0	0	0	1	0	3	0	1	44	56	4	3	0	2	2	5	23	19	3	3	0	0	0	0	6	0-1
603	Real Madrid-Valencia CF	2021-02-14	1	2	2	23	0	1	0	0	3	0	2	0	61	39	16	4	7	1	6	1	13	12	0	3	0	0	0	0	3	2-0
604	Levante UD-CA Osasuna	2021-02-14	1	2	2	23	0	0	0	1	0	3	0	1	63	37	13	7	4	2	2	1	13	10	1	2	0	0	0	1	4	0-1
605	Villarreal CF-Real Betis	2021-02-14	1	2	2	23	0	0	0	1	0	3	1	2	56	44	9	15	5	4	7	2	19	13	3	2	0	0	0	1	6	1-2
606	Cádiz CF-Athletic Club	2021-02-15	1	2	2	23	0	0	0	1	0	3	0	4	42	58	11	13	2	8	5	8	15	13	3	2	0	0	0	0	3	0-4
607	Levante UD-Atlético de Madrid	2021-02-17	1	2	2	2 (recovery)	0	0	1	0	1	1	1	1	37	63	7	14	4	6	1	8	10	10	1	3	0	0	0	0	4	1-1
608	Real Betis-Getafe CF	2021-02-19	1	2	2	24	0	1	0	0	3	0	1	0	65	35	12	6	5	1	5	2	17	18	5	4	1	0	0	2	4	1-0
609	Elche CF-SD Eibar	2021-02-20	1	2	2	24	0	1	0	0	3	0	1	0	48	52	6	13	2	3	1	4	16	9	2	1	0	0	0	0	5	1-0
610	Atlético de Madrid-Levante UD	2021-02-20	1	2	2	24	0	0	0	1	0	3	0	2	55	45	28	6	11	1	12	2	10	15	2	3	0	0	0	0	6	0-1
611	Valencia CF-RC Celta	2021-02-20	1	2	2	24	0	1	0	0	3	0	2	0	58	42	10	5	3	2	6	1	9	19	2	3	0	1	0	0	9	0-0
612	Real Valladolid CF-Real Madrid	2021-02-20	1	2	2	24	0	0	0	1	0	3	0	1	35	65	9	10	5	2	4	5	13	11	4	2	0	0	0	0	4	0-1
613	FC Barcelona-Cádiz CF	2021-02-21	1	2	2	24	0	0	1	0	1	1	1	1	81	19	20	3	4	1	8	0	13	12	0	2	0	0	1	1	6	1-1
614	Real Sociedad-D. Alavés	2021-02-21	1	2	2	24	0	1	0	0	3	0	4	0	65	35	8	7	4	2	4	3	17	16	3	2	0	0	0	0	2	4-0
615	SD Huesca-Granada CF	2021-02-21	1	2	2	24	0	1	0	0	3	0	3	2	60	40	15	8	6	5	5	2	13	14	3	3	0	1	0	1	5	3-2
616	Athletic Club-Villarreal CF	2021-02-21	1	2	2	24	0	0	1	0	1	1	1	1	48	52	18	3	8	2	6	1	12	12	2	2	0	0	0	0	4	1-1
617	CA Osasuna-Sevilla FC	2021-02-22	1	2	2	24	0	0	0	1	0	3	0	2	41	59	6	10	0	5	3	5	14	15	2	2	0	0	0	0	3	0-2
618	FC Barcelona-Elche CF	2021-02-24	1	2	2	1 (recovery)	0	1	0	0	3	0	3	0	65	35	9	6	5	1	6	3	8	8	0	0	0	0	0	0	3	3-0
619	Levante UD-Athletic Club	2021-02-26	1	2	2	25	0	0	1	0	1	1	1	1	45	55	10	11	4	5	2	10	11	13	4	1	0	0	1	1	5	1-1
620	SD Eibar-SD Huesca	2021-02-27	1	2	2	25	0	0	1	0	1	1	1	1	55	45	17	4	3	1	6	2	19	11	2	2	0	0	0	0	4	1-1
621	Sevilla FC-FC Barcelona	2021-02-27	1	2	2	25	0	0	0	1	0	3	0	2	44	56	4	9	2	5	3	3	20	9	5	2	0	0	0	0	4	0-2
622	D. Alavés-CA Osasuna	2021-02-27	1	2	2	25	0	0	0	1	0	3	0	1	53	47	4	6	1	3	5	2	18	20	3	4	0	0	0	0	4	0-1
623	Getafe CF-Valencia CF	2021-02-27	1	2	2	25	0	1	0	0	3	0	3	0	42	58	15	6	4	0	3	6	21	12	5	2	0	1	0	0	5	3-0
624	RC Celta-Real Valladolid CF	2021-02-28	1	2	2	25	0	0	1	0	1	1	1	1	66	34	11	7	2	3	3	5	20	20	3	5	0	0	0	0	6	0-1
625	Cádiz CF-Real Betis	2021-02-28	1	2	2	25	0	0	0	1	0	3	0	1	35	65	5	9	3	4	3	7	9	13	1	2	0	0	0	0	4	0-1
626	Granada CF-Elche CF	2021-02-28	1	2	2	25	0	1	0	0	3	0	2	1	43	57	13	12	4	4	5	5	14	12	3	2	0	0	0	0	5	2-1
627	Villarreal CF-Atlético de Madrid	2021-02-28	1	2	2	25	0	0	0	1	0	3	0	2	63	37	19	6	6	5	10	2	15	19	2	3	0	0	0	0	2	0-2
628	Real Madrid-Real Sociedad	2021-03-01	1	2	2	25	0	0	1	0	1	1	1	1	60	40	20	6	2	2	13	4	6	10	0	1	0	0	0	0	3	1-1
629	Valencia CF-Villarreal CF	2021-03-05	1	2	2	26	0	1	0	0	3	0	2	1	53	47	25	10	4	5	5	3	12	10	4	3	0	0	1	1	5	1-1
630	Real Valladolid CF-Getafe CF	2021-03-06	1	2	2	26	0	1	0	0	3	0	2	1	50	50	4	9	3	2	1	6	16	19	2	2	0	1	0	0	5	2-1
631	Elche CF-Sevilla FC	2021-03-06	1	2	2	26	0	1	0	0	3	0	2	1	37	63	6	11	3	3	6	3	16	11	4	0	0	0	0	0	6	2-1
632	Cádiz CF-SD Eibar	2021-03-06	1	2	2	26	0	1	0	0	3	0	1	0	32	68	6	16	2	1	0	12	7	11	2	2	0	0	1	0	7	1-0
633	CA Osasuna-FC Barcelona	2021-03-06	1	2	2	26	0	0	0	1	0	3	0	2	37	63	10	13	3	6	3	4	4	12	0	2	0	0	0	0	3	0-2
634	SD Huesca-RC Celta	2021-03-07	1	2	2	26	0	0	0	1	0	3	3	4	50	50	19	10	7	7	6	3	12	21	0	2	0	0	0	0	6	3-4
635	Atlético de Madrid-Real Madrid	2021-03-07	1	2	2	26	0	0	1	0	1	1	1	1	39	61	11	18	5	8	1	6	19	9	5	1	0	0	0	0	4	1-1
636	Real Sociedad-Levante UD	2021-03-07	1	2	2	26	0	1	0	0	3	0	1	0	52	48	25	6	8	1	8	5	13	14	0	2	0	0	0	1	5	1-0
637	Athletic Club-Granada CF	2021-03-07	1	2	2	26	0	1	0	0	3	0	2	1	49	51	7	13	5	3	6	9	10	10	2	2	0	0	0	1	5	1-1
638	Real Betis-D. Alavés	2021-03-08	1	2	2	26	0	1	0	0	3	0	3	2	77	23	23	4	8	3	13	1	13	11	0	3	0	0	0	1	4	3-2
639	Atlético de Madrid-Athletic Club	2021-03-10	1	2	2	18 (recovery)	0	1	0	0	3	0	2	1	47	53	11	4	5	2	5	4	12	13	2	2	0	0	0	1	5	2-1
640	Levante UD-Valencia CF	2021-03-12	1	2	2	27	0	1	0	0	3	0	1	0	44	56	11	11	3	2	3	3	17	13	3	4	0	0	0	0	3	1-0
641	D. Alavés-Cádiz CF	2021-03-13	1	2	2	27	0	0	1	0	1	1	1	1	51	49	9	9	3	1	0	2	22	6	3	3	1	0	1	1	5	1-1
642	Real Madrid-Elche CF	2021-03-13	1	2	2	27	0	1	0	0	3	0	2	1	66	34	17	3	4	2	6	1	11	16	1	1	0	0	0	0	5	1-1
643	CA Osasuna-Real Valladolid CF	2021-03-13	1	2	2	27	0	0	1	0	1	1	0	0	53	47	14	12	2	2	7	3	12	9	2	3	0	0	0	0	6	0-0
644	Getafe CF-Atlético de Madrid	2021-03-13	1	2	2	27	0	0	1	0	1	1	0	0	27	73	11	15	2	7	3	11	9	17	2	4	1	0	0	0	5	0-0
645	RC Celta-Athletic Club	2021-03-14	1	2	2	27	0	0	1	0	1	1	0	0	66	34	12	6	3	1	1	3	20	13	3	1	0	0	0	0	5	0-0
646	Granada CF-Real Sociedad	2021-03-14	1	2	2	27	0	1	0	0	3	0	1	0	32	68	7	7	2	1	4	6	23	16	2	3	0	0	0	0	6	1-0
647	SD Eibar-Villarreal CF	2021-03-14	1	2	2	27	0	0	0	1	0	3	1	3	60	40	16	13	7	8	7	2	12	9	2	2	0	1	0	1	3	1-3
648	Sevilla FC-Real Betis	2021-03-14	1	2	2	27	0	1	0	0	3	0	1	0	53	47	9	13	3	3	3	6	12	14	3	7	0	0	0	0	3	1-0
649	FC Barcelona-SD Huesca	2021-03-15	1	2	2	27	0	1	0	0	3	0	4	1	69	31	12	8	5	4	7	3	8	13	0	2	0	0	1	0	3	3-1
650	Sevilla FC-Elche CF	2021-03-17	1	2	2	2 (recovery)	0	1	0	0	3	0	2	0	67	33	13	11	8	5	4	1	9	8	2	1	0	0	0	0	4	2-0
651	Real Betis-Levante UD	2021-03-19	1	2	2	28	0	1	0	0	3	0	2	0	56	44	15	7	6	1	4	1	14	10	2	0	0	0	0	0	4	2-0
652	Athletic Club-SD Eibar	2021-03-20	1	2	2	28	0	0	1	0	1	1	1	1	56	44	18	4	4	2	10	1	5	15	1	1	0	0	0	0	3	1-1
653	RC Celta-Real Madrid	2021-03-20	1	2	2	28	0	0	0	1	0	3	1	3	51	49	8	16	3	4	1	7	23	13	3	4	0	0	0	0	5	1-2
654	SD Huesca-CA Osasuna	2021-03-20	1	2	2	28	0	0	1	0	1	1	0	0	56	44	15	7	3	2	5	1	9	13	1	2	0	0	0	0	6	0-0
655	Real Valladolid CF-Sevilla FC	2021-03-20	1	2	2	28	0	0	1	0	1	1	1	1	31	69	3	11	2	4	2	8	17	10	3	1	0	0	0	1	5	1-0
656	Getafe CF-Elche CF	2021-03-21	1	2	2	28	0	0	1	0	1	1	1	1	48	52	12	6	5	2	4	8	17	21	3	7	0	0	0	1	8	1-1
657	Valencia CF-Granada CF	2021-03-21	1	2	2	28	0	1	0	0	3	0	2	1	49	51	18	15	9	3	3	4	11	11	0	3	0	0	0	0	7	2-1
658	Villarreal CF-Cádiz CF	2021-03-21	1	2	2	28	0	1	0	0	3	0	2	1	58	42	13	9	4	3	5	6	14	6	3	3	0	0	0	1	6	2-1
659	Atlético de Madrid-D. Alavés	2021-03-21	1	2	2	28	0	1	0	0	3	0	1	0	62	38	8	9	4	3	6	5	17	12	3	3	0	0	1	0	4	1-0
660	Real Sociedad-FC Barcelona	2021-03-21	1	2	2	28	0	0	0	1	0	3	1	6	31	69	10	14	5	10	1	1	11	12	3	2	0	0	0	0	5	1-6
661	Levante UD-SD Huesca	2021-04-02	1	2	2	29	0	0	0	1	0	3	0	2	62	38	13	6	3	2	8	2	15	7	2	2	0	0	0	0	5	0-2
662	Granada CF-Villarreal CF	2021-04-03	1	2	2	29	0	0	0	1	0	3	0	3	44	56	6	15	2	6	3	5	14	14	2	2	0	0	2	1	4	0-3
663	Real Madrid-SD Eibar	2021-04-03	1	2	2	29	0	1	0	0	3	0	2	0	64	36	21	10	8	4	6	9	6	8	0	2	0	0	0	0	4	2-0
664	CA Osasuna-Getafe CF	2021-04-03	1	2	2	29	0	0	1	0	1	1	0	0	59	41	4	6	1	2	2	4	23	18	2	3	0	0	0	0	4	0-0
665	D. Alavés-RC Celta	2021-04-04	1	2	2	29	0	0	0	1	0	3	1	3	54	46	17	8	7	6	6	2	9	21	4	5	0	1	0	0	5	1-3
666	Elche CF-Real Betis	2021-04-04	1	2	2	29	0	0	1	0	1	1	1	1	46	54	7	13	3	3	7	2	9	15	1	4	0	0	1	0	2	1-1
667	Cádiz CF-Valencia CF	2021-04-04	1	2	2	29	0	1	0	0	3	0	2	1	32	68	6	11	2	6	4	13	10	7	2	2	0	0	0	0	4	2-1
668	Sevilla FC-Atlético de Madrid	2021-04-04	1	2	2	29	0	1	0	0	3	0	1	0	57	43	18	9	5	4	3	2	13	11	2	4	0	0	0	1	5	1-0
669	FC Barcelona-Real Valladolid CF	2021-04-05	1	2	2	29	0	1	0	0	3	0	1	0	68	32	25	7	10	2	4	1	12	13	3	3	0	1	0	0	4	1-0
670	Real Sociedad-Athletic Club	2021-04-07	1	2	2	29	0	0	1	0	1	1	1	1	51	49	12	11	2	2	3	6	18	7	3	1	0	0	0	0	3	1-1
671	SD Huesca-Elche CF	2021-04-09	1	2	2	30	0	1	0	0	3	0	3	1	33	67	8	8	5	2	6	6	17	13	2	2	0	0	0	1	4	3-1
672	Getafe CF-Cádiz CF	2021-04-10	1	2	2	30	0	0	0	1	0	3	0	1	58	42	19	8	4	3	10	4	10	13	3	2	0	0	0	0	6	0-1
673	Athletic Club-D. Alavés	2021-04-10	1	2	2	30	0	0	1	0	1	1	0	0	44	56	11	9	4	0	6	6	13	15	2	2	0	0	0	0	4	0-0
674	SD Eibar-Levante UD	2021-04-10	1	2	2	30	0	0	0	1	0	3	0	1	53	47	10	6	4	1	6	3	9	7	3	2	0	0	0	0	3	0-1
675	Real Madrid-FC Barcelona	2021-04-10	1	2	2	30	0	1	0	0	3	0	2	1	31	69	14	18	3	4	5	6	16	10	3	4	1	0	0	0	5	2-1
676	Villarreal CF-CA Osasuna	2021-04-11	1	2	2	30	0	0	0	1	0	3	1	2	68	32	15	12	6	4	6	5	6	12	0	0	0	0	0	0	5	1-2
677	Valencia CF-Real Sociedad	2021-04-11	1	2	2	30	0	0	1	0	1	1	2	2	41	59	9	16	2	5	4	5	11	17	6	4	1	0	0	2	6	2-2
678	Real Valladolid CF-Granada CF	2021-04-11	1	2	2	30	0	0	0	1	0	3	1	2	55	45	7	12	3	6	3	4	14	15	4	2	0	0	0	1	6	1-2
679	Real Betis-Atlético de Madrid	2021-04-11	1	2	2	30	0	0	1	0	1	1	1	1	54	46	8	10	4	4	5	5	12	13	0	0	0	0	0	0	5	1-1
680	RC Celta-Sevilla FC	2021-04-12	1	2	2	30	0	0	0	1	0	3	3	4	42	58	12	13	5	6	5	2	18	15	3	2	0	0	0	1	4	3-4
681	CA Osasuna-Elche CF	2021-04-18	1	2	2	33	0	1	0	0	3	0	2	0	48	52	9	8	3	2	4	5	14	15	2	1	0	0	0	0	2	2-0
682	Real Sociedad-Sevilla FC	2021-04-18	1	2	2	33	0	0	0	1	0	3	1	2	49	51	5	15	2	7	7	3	20	15	3	2	0	0	0	0	4	1-2
683	D. Alavés-SD Huesca	2021-04-18	1	2	2	33	0	1	0	0	3	0	1	0	51	49	10	9	2	1	7	3	15	13	1	2	0	0	0	0	4	1-0
684	Atlético de Madrid-SD Eibar	2021-04-18	1	2	2	33	0	1	0	0	3	0	5	0	61	39	10	0	7	0	8	3	10	10	0	1	0	0	0	0	3	5-0
685	Real Betis-Valencia CF	2021-04-18	1	2	2	33	0	0	1	0	1	1	2	2	56	44	9	9	5	3	6	3	12	10	3	1	0	0	1	0	5	2-2
686	Cádiz CF-RC Celta	2021-04-18	1	2	2	33	0	0	1	0	1	1	0	0	23	77	5	11	2	4	4	7	6	13	0	1	0	0	0	0	3	0-0
687	Getafe CF-Real Madrid	2021-04-18	1	2	2	33	0	0	1	0	1	1	0	0	41	59	19	10	6	2	7	6	17	8	3	1	0	0	0	0	4	0-0
688	Levante UD-Villarreal CF	2021-04-18	1	2	2	33	0	0	0	1	0	3	1	5	44	56	12	14	3	7	4	5	9	7	2	1	0	0	0	0	2	1-5
689	Levante UD-Sevilla FC	2021-04-21	1	2	2	31	0	0	0	1	0	3	0	1	43	57	6	10	1	3	2	3	15	13	4	1	0	0	0	0	4	0-1
690	CA Osasuna-Valencia CF	2021-04-21	1	2	2	31	0	1	0	0	3	0	3	1	45	55	18	10	9	5	5	6	17	11	1	2	0	0	0	2	5	3-1
691	Real Betis-Athletic Club	2021-04-21	1	2	2	31	0	0	1	0	1	1	0	0	40	60	6	16	2	4	5	4	10	16	3	2	1	0	0	0	6	0-0
692	D. Alavés-Villarreal CF	2021-04-21	1	2	2	31	0	1	0	0	3	0	2	1	33	67	9	10	4	5	3	8	8	11	2	1	0	0	0	0	4	2-1
693	Elche CF-Real Valladolid CF	2021-04-21	1	2	2	31	0	0	1	0	1	1	1	1	45	55	9	12	3	4	4	4	23	11	5	3	0	0	0	0	4	1-1
694	Cádiz CF-Real Madrid	2021-04-21	1	2	2	31	0	0	0	1	0	3	0	3	39	61	13	14	3	4	7	3	13	20	4	3	0	0	1	0	3	0-3
695	Atlético de Madrid-SD Huesca	2021-04-22	1	2	2	31	0	1	0	0	3	0	2	0	53	47	17	5	12	2	8	1	9	11	2	0	0	0	0	0	4	2-0
696	Granada CF-SD Eibar	2021-04-22	1	2	2	31	0	1	0	0	3	0	4	1	33	67	8	16	4	3	4	7	13	10	1	1	0	0	0	0	3	4-1
697	Real Sociedad-RC Celta	2021-04-22	1	2	2	31	0	1	0	0	3	0	2	1	41	59	7	10	3	3	2	4	17	17	4	5	0	0	0	2	6	2-1
698	FC Barcelona-Getafe CF	2021-04-22	1	2	2	31	0	1	0	0	3	0	5	2	81	19	9	5	6	1	3	1	8	15	2	0	0	0	1	1	4	4-2
699	Elche CF-Levante UD	2021-04-24	1	2	2	32	0	1	0	0	3	0	1	0	34	66	8	6	3	1	4	2	10	14	3	4	0	0	0	0	6	1-0
700	Real Valladolid CF-Cádiz CF	2021-04-24	1	2	2	32	0	0	1	0	1	1	1	1	61	39	13	6	6	2	5	7	11	20	1	3	0	0	0	0	4	1-1
701	Valencia CF-D. Alavés	2021-04-24	1	2	2	32	0	0	1	0	1	1	1	1	54	46	9	6	2	2	7	2	17	15	4	0	0	0	0	0	6	1-1
702	Real Madrid-Real Betis	2021-04-24	1	2	2	32	0	0	1	0	1	1	0	0	58	42	17	6	5	2	8	2	17	13	1	2	0	0	0	0	4	0-0
703	SD Huesca-Getafe CF	2021-04-25	1	2	2	32	0	0	0	1	0	3	0	2	69	31	8	6	1	4	1	0	16	22	2	4	0	0	0	0	3	0-2
704	Villarreal CF-FC Barcelona	2021-04-25	1	2	2	32	0	0	0	1	0	3	1	2	44	56	10	15	4	5	6	1	16	10	2	3	1	0	0	0	6	1-2
705	RC Celta-CA Osasuna	2021-04-25	1	2	2	32	0	1	0	0	3	0	2	1	49	51	7	12	2	3	2	8	13	12	1	4	0	0	1	0	6	2-1
706	Sevilla FC-Granada CF	2021-04-25	1	2	2	32	0	1	0	0	3	0	2	1	65	35	10	4	4	2	5	5	11	14	2	3	0	0	1	1	4	2-1
707	Athletic Club-Atlético de Madrid	2021-04-25	1	2	2	32	0	1	0	0	3	0	2	1	38	62	11	14	3	3	4	11	20	7	4	2	0	0	0	0	3	2-1
708	SD Eibar-Real Sociedad	2021-04-26	1	2	2	32	0	0	0	1	0	3	0	1	53	47	14	5	5	2	2	3	8	20	5	1	0	0	0	0	3	0-1
709	Athletic Club-Real Valladolid CF	2021-04-28	1	2	2	33 (recovery)	0	0	1	0	1	1	2	2	51	49	13	14	7	4	5	7	8	13	1	1	0	0	0	0	3	2-2
710	FC Barcelona-Granada CF	2021-04-29	1	2	2	33 (recovery)	0	0	0	1	0	3	1	2	82	18	16	5	4	2	6	1	10	22	0	4	0	0	0	0	5	1-2
711	RC Celta-Levante UD	2021-04-30	1	2	2	34	0	1	0	0	3	0	2	0	54	46	8	10	5	2	1	5	12	13	2	2	0	0	0	0	5	2-0
712	SD Eibar-D. Alavés	2021-05-01	1	2	2	34	0	1	0	0	3	0	3	0	45	55	15	6	4	2	10	5	12	12	0	2	0	0	0	0	4	3-0
713	Elche CF-Atlético de Madrid	2021-05-01	1	2	2	34	0	0	0	1	0	3	0	1	51	49	6	11	1	4	3	2	20	16	3	3	0	0	0	1	5	0-1
714	SD Huesca-Real Sociedad	2021-05-01	1	2	2	34	0	1	0	0	3	0	1	0	47	53	10	7	3	3	2	7	14	11	2	2	0	0	0	0	4	1-0
715	Real Madrid-CA Osasuna	2021-05-01	1	2	2	34	0	1	0	0	3	0	2	0	66	34	22	3	6	2	8	0	9	12	0	2	0	0	0	0	3	2-0
716	Real Valladolid CF-Real Betis	2021-05-02	1	2	2	34	0	0	1	0	1	1	1	1	44	56	10	11	2	4	3	2	7	14	2	5	0	0	0	0	5	1-1
717	Villarreal CF-Getafe CF	2021-05-02	1	2	2	34	0	1	0	0	3	0	1	0	67	33	4	15	3	3	4	4	13	17	1	2	0	0	0	0	5	1-0
718	Granada CF-Cádiz CF	2021-05-02	1	2	2	34	0	0	0	1	0	3	0	1	65	35	9	8	2	4	6	5	12	10	7	2	1	0	0	0	7	0-1
719	Valencia CF-FC Barcelona	2021-05-02	1	2	2	34	0	0	0	1	0	3	2	3	32	68	9	14	4	7	2	1	12	14	2	1	0	0	1	0	4	2-3
720	Sevilla FC-Athletic Club	2021-05-03	1	2	2	34	0	0	0	1	0	3	0	1	74	26	18	8	3	2	7	2	13	15	1	0	0	0	0	0	6	0-1
721	Real Sociedad-Elche CF	2021-05-07	1	2	2	35	0	1	0	0	3	0	2	0	74	26	16	1	3	0	7	0	8	11	1	3	0	1	0	0	3	1-0
722	D. Alavés-Levante UD	2021-05-08	1	2	2	35	0	0	1	0	1	1	2	2	53	47	15	6	5	3	8	3	12	18	2	1	0	0	0	0	10	2-2
723	FC Barcelona-Atlético de Madrid	2021-05-08	1	2	2	35	0	0	1	0	1	1	0	0	59	41	12	11	7	6	5	7	13	26	3	3	0	0	0	0	3	0-0
724	Cádiz CF-SD Huesca	2021-05-08	1	2	2	35	0	1	0	0	3	0	2	1	33	67	11	13	1	5	3	3	14	13	4	0	0	0	0	0	6	2-1
725	Athletic Club-CA Osasuna	2021-05-08	1	2	2	35	0	0	1	0	1	1	2	2	45	55	13	13	3	4	10	4	4	10	1	2	0	0	0	0	3	2-2
726	Getafe CF-SD Eibar	2021-05-09	1	2	2	35	0	0	0	1	0	3	0	1	39	61	10	7	2	3	4	2	11	11	1	2	0	0	1	0	3	0-1
727	Valencia CF-Real Valladolid CF	2021-05-09	1	2	2	35	0	1	0	0	3	0	3	0	41	59	6	19	3	2	1	9	17	6	0	0	0	0	0	0	3	3-0
728	Villarreal CF-RC Celta	2021-05-09	1	2	2	35	0	0	0	1	0	3	2	4	60	40	16	11	7	6	5	3	11	16	3	3	0	1	2	1	6	2-4
729	Real Madrid-Sevilla FC	2021-05-09	1	2	2	35	0	0	1	0	1	1	2	2	59	41	17	7	7	3	7	3	8	8	1	2	0	0	1	0	7	1-2
730	Real Betis-Granada CF	2021-05-10	1	2	2	35	0	1	0	0	3	0	2	1	62	38	14	11	6	5	9	2	16	11	2	4	0	0	0	0	4	2-1
731	CA Osasuna-Cádiz CF	2021-05-11	1	2	2	36	0	1	0	0	3	0	3	2	64	36	14	10	4	4	3	5	15	12	2	2	0	0	1	1	4	2-2
732	Elche CF-D. Alavés	2021-05-11	1	2	2	36	0	0	0	1	0	3	0	2	67	33	11	9	4	2	7	5	21	15	2	4	0	0	0	0	3	0-2
733	Levante UD-FC Barcelona	2021-05-11	1	2	2	36	0	0	1	0	1	1	3	3	39	61	16	17	6	5	8	6	12	4	2	2	0	0	0	0	5	3-3
734	Sevilla FC-Valencia CF	2021-05-12	1	2	2	36	0	1	0	0	3	0	1	0	61	39	10	6	4	2	3	6	17	6	2	2	0	0	0	0	6	1-0
735	RC Celta-Getafe CF	2021-05-12	1	2	2	36	0	1	0	0	3	0	1	0	61	39	4	13	1	4	1	5	16	18	1	3	0	0	0	0	5	1-0
736	SD Huesca-Athletic Club	2021-05-12	1	2	2	36	0	1	0	0	3	0	1	0	51	49	18	4	6	3	5	0	9	14	0	1	0	0	0	0	2	1-0
737	Atlético de Madrid-Real Sociedad	2021-05-12	1	2	2	36	0	1	0	0	3	0	2	1	35	65	12	14	4	7	1	7	11	15	0	0	0	0	0	0	3	2-1
738	Real Valladolid CF-Villarreal CF	2021-05-13	1	2	2	36	0	0	0	1	0	3	0	2	39	61	11	9	2	3	3	6	15	14	3	1	0	0	0	0	4	0-1
739	SD Eibar-Real Betis	2021-05-13	1	2	2	36	0	0	1	0	1	1	1	1	64	36	14	9	4	4	5	4	12	8	3	1	0	0	0	0	5	1-1
740	Granada CF-Real Madrid	2021-05-13	1	2	2	36	0	0	0	1	0	3	1	4	35	65	10	16	5	7	2	3	15	9	3	3	0	0	0	0	3	1-4
741	D. Alavés-Granada CF	2021-05-16	1	2	2	37	0	1	0	0	3	0	4	2	53	47	14	5	9	2	6	1	7	11	2	4	0	0	0	0	4	4-2
742	Athletic Club-Real Madrid	2021-05-16	1	2	2	37	0	0	0	1	0	3	0	1	36	64	8	11	1	2	4	11	10	7	3	1	1	0	0	0	3	0-1
743	Atlético de Madrid-CA Osasuna	2021-05-16	1	2	2	37	0	1	0	0	3	0	2	1	73	27	26	5	9	2	8	0	2	13	2	2	0	0	0	0	6	2-1
744	FC Barcelona-RC Celta	2021-05-16	1	2	2	37	0	0	0	1	0	3	1	2	64	36	21	4	4	4	7	1	9	14	3	2	1	0	0	0	4	1-2
745	Real Betis-SD Huesca	2021-05-16	1	2	2	37	0	1	0	0	3	0	1	0	48	52	10	7	2	0	2	5	15	19	1	5	0	1	0	1	7	1-0
746	Getafe CF-Levante UD	2021-05-16	1	2	2	37	0	1	0	0	3	0	2	1	34	66	9	4	3	1	3	4	15	11	5	0	1	0	0	0	6	2-1
747	Cádiz CF-Elche CF	2021-05-16	1	2	2	37	0	0	0	1	0	3	1	3	32	68	7	20	3	5	1	8	13	15	3	4	0	0	0	1	5	1-3
748	Real Sociedad-Real Valladolid CF	2021-05-16	1	2	2	37	0	1	0	0	3	0	4	1	54	46	14	19	8	5	2	4	16	11	2	4	0	0	0	1	4	4-1
749	Valencia CF-SD Eibar	2021-05-16	1	2	2	37	2689	1	0	0	3	0	4	1	43	57	9	20	5	8	2	10	5	7	0	0	0	0	0	0	8	4-1
750	Villarreal CF-Sevilla FC	2021-05-16	1	2	2	37	4800	1	0	0	3	0	4	0	42	58	12	17	5	5	3	6	9	7	0	3	0	1	0	0	4	4-0
751	Levante UD-Cádiz CF	2021-05-21	1	2	2	38	4390	0	1	0	1	1	2	2	70	30	17	6	4	2	7	0	17	8	0	2	0	0	0	0	3	2-2
752	RC Celta-Real Betis	2021-05-22	1	2	2	38	1738	0	0	1	0	3	2	3	65	35	11	11	4	5	8	4	20	20	6	7	0	1	1	1	6	2-3
753	SD Eibar-FC Barcelona	2021-05-22	1	2	2	38	0	0	0	1	0	3	0	1	33	67	17	7	3	3	6	3	11	15	0	3	0	0	0	0	3	0-1
754	SD Huesca-Valencia CF	2021-05-22	1	2	2	38	0	0	1	0	1	1	0	0	54	46	23	11	8	4	9	3	17	15	2	1	0	0	0	0	6	0-0
755	CA Osasuna-Real Sociedad	2021-05-22	1	2	2	38	0	0	0	1	0	3	0	1	43	57	7	11	1	1	3	3	15	7	1	0	0	0	0	0	4	0-1
756	Real Madrid-Villarreal CF	2021-05-22	1	2	2	38	0	1	0	0	3	0	2	1	55	45	14	6	4	2	6	1	8	13	0	0	0	0	0	0	5	1-1
757	Real Valladolid CF-Atlético de Madrid	2021-05-22	1	2	2	38	0	0	0	1	0	3	1	2	49	51	10	14	4	3	4	6	11	11	4	6	0	0	0	0	3	1-2
758	Elche CF-Athletic Club	2021-05-22	1	2	2	38	3518	1	0	0	3	0	2	0	45	55	8	8	3	2	3	1	10	6	3	0	0	0	0	0	3	2-0
759	Granada CF-Getafe CF	2021-05-23	1	2	2	38	0	0	1	0	1	1	0	0	39	61	9	11	3	2	6	3	16	13	4	2	0	0	0	0	4	0-0
760	Sevilla FC-D. Alavés	2021-05-23	1	2	2	38	0	1	0	0	3	0	1	0	69	31	11	11	2	2	6	4	11	8	1	0	0	0	0	0	6	0-0
761	Fiorentina-Torino	2020-09-19	1	3	3	1	0	1	0	0	3	0	1	0	53	47	17	6	8	3	4	1	17	20	3	1	0	0	0	0	6	1-0
762	Hellas Verona-Roma	2020-09-19	1	3	3	1	0	0	1	0	1	1	0	0	45	55	10	21	7	7	0	6	19	20	2	0	0	0	0	0	3	0-0
763	Parma-Napoli	2020-09-20	1	3	3	1	1000	0	0	1	0	3	0	2	41	59	6	16	2	7	4	2	16	12	4	1	0	0	0	0	8	0-2
764	Genoa-Crotone	2020-09-20	1	3	3	1	0	1	0	0	3	0	4	1	49	51	12	12	8	5	6	4	13	14	4	2	0	0	0	0	3	4-1
765	Sassuolo-Cagliari	2020-09-20	1	3	3	1	1000	0	1	0	1	1	1	1	65	35	30	8	10	4	7	3	9	18	1	3	0	0	0	0	5	1-1
766	Juventus-Sampdoria	2020-09-20	1	3	3	1	1000	1	0	0	3	0	3	0	62	38	19	14	9	2	6	4	15	9	1	1	0	0	0	0	2	3-0
767	Milan-Bologna	2020-09-21	1	3	3	1	1000	1	0	0	3	0	2	0	61	39	17	12	6	5	7	4	13	17	3	5	0	1	0	1	4	2-0
768	Torino-Atalanta	2020-09-26	1	3	3	2	1000	0	0	1	0	3	2	4	46	54	7	17	5	7	2	6	11	12	1	2	0	0	0	0	5	2-4
769	Cagliari-Lazio	2020-09-26	1	3	3	2	1000	0	0	1	0	3	0	2	48	52	9	13	3	7	3	6	8	13	1	1	0	0	0	0	4	0-2
770	Sampdoria-Benevento	2020-09-26	1	3	3	2	1000	0	0	1	0	3	2	3	43	57	9	12	4	6	6	4	17	12	3	1	0	0	0	0	5	2-3
771	Inter-Fiorentina	2020-09-26	1	3	3	2	1000	1	0	0	3	0	4	3	63	37	16	10	7	4	5	1	15	10	1	1	0	0	0	0	4	4-3
772	Spezia-Sassuolo	2020-09-27	1	3	3	2	1000	0	0	1	0	3	1	4	39	61	13	16	6	8	3	5	13	8	2	1	0	0	1	0	4	1-4
773	Hellas Verona-Udinese	2020-09-27	1	3	3	2	1000	1	0	0	3	0	1	0	46	54	9	18	2	6	1	9	13	13	1	0	0	0	0	0	4	1-0
774	Napoli-Genoa	2020-09-27	1	3	3	2	1000	1	0	0	3	0	6	0	57	43	18	5	11	1	4	2	6	13	1	2	0	0	0	0	2	6-0
775	Crotone-Milan	2020-09-27	1	3	3	2	0	0	0	1	0	3	0	2	47	53	5	14	1	7	3	5	14	15	1	3	0	0	1	0	5	0-2
776	Roma-Juventus	2020-09-27	1	3	3	2	1000	0	1	0	1	1	2	2	43	57	9	7	6	3	5	7	19	9	2	3	0	1	1	1	4	2-2
777	Bologna-Parma	2020-09-28	1	3	3	2	1000	1	0	0	3	0	4	1	59	41	11	8	8	4	8	9	12	9	1	2	0	1	0	0	4	3-1
778	Benevento-Inter	2020-09-30	1	3	3	1 (recovery)	1000	0	0	1	0	3	2	5	34	66	11	19	7	12	5	1	10	15	1	0	0	0	0	0	3	2-5
779	Udinese-Spezia	2020-09-30	1	3	3	1 (recovery)	1000	0	0	1	0	3	0	2	50	50	11	4	5	3	2	2	13	17	0	5	0	1	0	0	6	0-1
780	Lazio-Atalanta	2020-09-30	1	3	3	1 (recovery)	1000	0	0	1	0	3	1	4	63	37	13	11	8	6	7	3	16	11	6	3	0	0	0	0	4	1-4
781	Fiorentina-Sampdoria	2020-10-02	1	3	3	3	1000	0	0	1	0	3	1	2	61	39	21	18	6	10	8	4	11	16	0	3	0	0	1	0	5	1-2
782	Sassuolo-Crotone	2020-10-03	1	3	3	3	1000	1	0	0	3	0	4	1	58	42	8	16	4	6	3	4	15	15	0	0	0	0	1	1	5	3-1
783	Udinese-Roma	2020-10-03	1	3	3	3	1000	0	0	1	0	3	0	1	45	55	10	13	5	3	4	1	15	10	1	0	0	0	0	0	5	0-1
784	Atalanta-Cagliari	2020-10-04	1	3	3	3	1000	1	0	0	3	0	5	2	56	44	22	11	14	3	3	9	11	9	0	0	0	0	0	0	3	5-2
785	Benevento-Bologna	2020-10-04	1	3	3	3	1000	1	0	0	3	0	1	0	39	61	8	16	3	7	4	10	13	15	2	1	0	0	0	0	5	1-0
786	Lazio-Inter	2020-10-04	1	3	3	3	1000	0	1	0	1	1	1	1	41	59	12	12	5	5	7	8	14	13	3	4	1	1	0	0	5	1-1
787	Parma-Hellas Verona	2020-10-04	1	3	3	3	1000	1	0	0	3	0	1	0	43	57	12	9	5	5	7	6	11	19	1	1	0	0	0	0	4	1-0
788	Milan-Spezia	2020-10-04	1	3	3	3	1000	1	0	0	3	0	3	0	60	40	14	3	5	2	4	6	14	19	1	2	0	0	0	0	3	3-0
789	Napoli-Atalanta	2020-10-17	1	3	3	4	1000	1	0	0	3	0	4	1	52	48	21	13	14	4	6	2	12	23	1	3	0	0	0	0	4	4-1
/	Inter-Milan	2020-10-17	1	3	3	4	same-stadium derby
790	Sampdoria-Lazio	2020-10-17	1	3	3	4	1000	1	0	0	3	0	3	0	53	47	12	9	8	1	4	3	12	10	2	2	0	0	0	0	3	3-0
791	Crotone-Juventus	2020-10-17	1	3	3	4	1000	0	1	0	1	1	1	1	45	55	11	8	3	3	3	4	17	14	3	3	0	1	0	1	7	1-1
792	Bologna-Sassuolo	2020-10-18	1	3	3	4	1000	0	0	1	0	3	3	4	45	55	14	23	7	12	7	11	20	12	2	1	0	0	0	0	8	3-4
793	Spezia-Fiorentina	2020-10-18	1	3	3	4	1000	0	1	0	1	1	2	2	50	50	12	9	2	6	5	5	15	18	2	2	0	0	0	0	6	2-2
794	Torino-Cagliari	2020-10-18	1	3	3	4	1000	0	0	1	0	3	2	3	54	46	10	10	6	7	2	4	14	16	2	3	0	0	0	1	5	2-3
795	Udinese-Parma	2020-10-18	1	3	3	4	1000	1	0	0	3	0	3	2	47	53	14	8	4	3	11	2	12	11	3	2	0	0	0	0	7	3-2
796	Roma-Benevento	2020-10-18	1	3	3	4	1000	1	0	0	3	0	5	2	54	46	18	10	10	4	6	4	17	7	3	2	0	0	1	1	3	5-2
797	Hellas Verona-Genoa	2020-10-19	1	3	3	4	1000	0	1	0	1	1	0	0	57	43	19	6	12	2	14	2	14	15	1	4	0	0	0	0	4	0-0
798	Sassuolo-Torino	2020-10-23	1	3	3	5	700	0	1	0	1	1	3	3	62	38	18	17	9	12	6	8	10	12	2	2	0	0	0	0	7	3-3
799	Atalanta-Sampdoria	2020-10-24	1	3	3	5	1000	0	0	1	0	3	1	3	69	31	16	6	5	4	3	1	11	18	3	4	0	0	1	1	4	1-2
800	Genoa-Inter	2020-10-24	1	3	3	5	1000	0	0	1	0	3	0	2	39	61	1	13	0	6	1	9	11	17	1	1	0	0	0	0	3	0-2
801	Lazio-Bologna	2020-10-24	1	3	3	5	1000	1	0	0	3	0	2	1	50	50	7	18	4	6	8	9	14	15	3	3	0	0	0	0	4	2-0
802	Cagliari-Crotone	2020-10-25	1	3	3	5	1000	1	0	0	3	0	4	2	46	54	17	12	8	6	5	1	13	13	2	4	0	1	0	0	5	4-2
803	Benevento-Napoli	2020-10-25	1	3	3	5	1000	0	0	1	0	3	1	2	41	59	7	16	3	8	3	15	18	13	3	1	0	0	0	0	7	1-2
804	Parma-Spezia	2020-10-25	1	3	3	5	1000	0	1	0	1	1	2	2	49	51	15	14	7	9	12	3	12	22	3	2	0	0	0	1	5	1-2
805	Fiorentina-Udinese	2020-10-25	1	3	3	5	1000	1	0	0	3	0	3	2	47	53	4	13	3	6	2	7	16	14	1	3	0	0	0	0	5	3-2
806	Juventus-Hellas Verona	2020-10-25	1	3	3	5	1000	0	1	0	1	1	1	1	59	41	21	5	8	2	6	3	14	19	1	4	0	0	0	0	7	1-1
807	Milan-Roma	2020-10-26	1	3	3	5	0	0	1	0	1	1	3	3	56	44	14	14	11	9	7	7	15	15	3	2	0	0	1	1	6	3-3
808	Crotone-Atalanta	2020-10-31	1	3	3	6	0	0	0	1	0	3	1	2	42	58	5	18	2	7	1	3	11	22	1	3	0	0	0	0	4	1-2
809	Inter-Parma	2020-10-31	1	3	3	6	0	0	1	0	1	1	2	2	64	36	22	5	9	3	15	2	13	7	1	1	0	0	0	0	5	1-2
810	Bologna-Cagliari	2020-10-31	1	3	3	6	0	1	0	0	3	0	3	2	54	46	21	8	11	4	7	3	12	19	3	3	0	0	0	0	7	3-2
811	Udinese-Milan	2020-11-01	1	3	3	6	0	0	0	1	0	3	1	2	47	53	11	11	3	4	2	4	14	12	2	2	0	0	0	1	4	1-2
812	Spezia-Juventus	2020-11-01	1	3	3	6	0	0	0	1	0	3	1	4	42	58	14	8	3	5	4	3	14	7	3	1	0	0	1	0	3	1-4
813	Torino-Lazio	2020-11-01	1	3	3	6	0	0	0	1	0	3	3	4	45	55	10	10	6	5	7	1	11	12	2	4	0	0	1	1	10	3-2
814	Napoli-Sassuolo	2020-11-01	1	3	3	6	0	0	0	1	0	3	0	2	44	56	23	9	7	5	12	3	7	9	2	2	0	0	1	0	8	0-1
815	Roma-Fiorentina	2020-11-01	1	3	3	6	0	1	0	0	3	0	2	0	43	57	16	6	7	1	7	4	17	16	3	2	0	1	0	0	4	2-0
/	Sampdoria-Genoa	2020-11-01	1	3	3	6	same-stadium derby
816	Hellas Verona-Benevento	2020-11-02	1	3	3	6	0	1	0	0	3	0	3	1	43	57	13	14	7	5	4	5	20	14	5	4	0	1	0	0	5	3-1
817	Genoa-Torino	2020-11-04	1	3	3	3 (recovery)	0	0	0	1	0	3	1	2	47	53	14	7	4	1	5	2	10	18	2	4	0	0	0	0	6	0-2
818	Sassuolo-Udinese	2020-11-06	1	3	3	7	0	0	1	0	1	1	0	0	59	41	4	1	1	0	3	6	17	13	2	2	0	0	0	0	4	0-0
819	Cagliari-Sampdoria	2020-11-07	1	3	3	7	0	1	0	0	3	0	2	0	57	43	13	5	7	1	2	6	12	16	0	2	0	1	0	1	5	2-0
820	Benevento-Spezia	2020-11-07	1	3	3	7	0	0	0	1	0	3	0	3	37	63	4	13	3	7	2	4	13	18	3	3	0	0	0	0	0	0-3
821	Parma-Fiorentina	2020-11-07	1	3	3	7	0	0	1	0	1	1	0	0	39	61	5	6	0	4	2	3	17	17	1	2	0	0	0	0	3	0-0
822	Lazio-Juventus	2020-11-08	1	3	3	7	0	0	1	0	1	1	1	1	54	46	9	10	3	6	4	2	12	12	2	2	0	0	0	0	5	0-1
823	Atalanta-Inter	2020-11-08	1	3	3	7	0	0	1	0	1	1	1	1	52	48	9	10	4	3	2	5	15	13	1	3	0	0	0	0	4	1-1
824	Genoa-Roma	2020-11-08	1	3	3	7	0	0	0	1	0	3	1	3	47	53	7	18	5	11	1	8	10	11	1	0	0	0	0	0	4	1-3
825	Torino-Crotone	2020-11-08	1	3	3	7	0	0	1	0	1	1	0	0	48	52	5	9	1	2	6	3	15	16	3	4	0	1	0	0	5	0-0
826	Bologna-Napoli	2020-11-08	1	3	3	7	0	0	0	1	0	3	0	1	50	50	8	12	4	4	4	7	12	11	3	0	0	0	0	0	6	0-1
827	Milan-Hellas Verona	2020-11-08	1	3	3	7	0	0	1	0	1	1	2	2	65	35	27	5	9	3	14	1	16	20	1	3	0	0	0	1	6	1-2
828	Crotone-Lazio	2020-11-21	1	3	3	8	0	0	0	1	0	3	0	2	51	49	13	13	7	9	2	6	11	11	3	4	0	0	0	0	3	0-2
829	Spezia-Atalanta	2020-11-21	1	3	3	8	0	0	1	0	1	1	0	0	55	45	8	10	3	5	1	2	19	18	3	3	0	0	0	0	5	0-0
830	Juventus-Cagliari	2020-11-21	1	3	3	8	0	1	0	0	3	0	2	0	62	38	19	3	8	0	9	1	11	7	3	2	0	0	0	0	4	2-0
831	Fiorentina-Benevento	2020-11-22	1	3	3	8	0	0	0	1	0	3	0	1	58	42	5	13	3	4	4	4	14	16	2	3	0	0	0	0	6	0-1
832	Hellas Verona-Sassuolo	2020-11-22	1	3	3	8	0	0	0	1	0	3	0	2	51	49	17	12	7	5	7	1	13	20	1	3	0	0	0	0	4	0-2
833	Inter-Torino	2020-11-22	1	3	3	8	0	1	0	0	3	0	4	2	57	43	9	11	7	6	1	1	20	14	3	2	0	0	1	1	5	4-2
834	Roma-Parma	2020-11-22	1	3	3	8	0	1	0	0	3	0	3	0	58	42	15	1	7	1	4	1	5	4	0	0	0	0	0	0	3	3-0
835	Sampdoria-Bologna	2020-11-22	1	3	3	8	0	0	0	1	0	3	1	2	45	55	9	9	4	5	9	10	12	9	2	2	0	0	0	0	6	1-2
836	Udinese-Genoa	2020-11-22	1	3	3	8	0	1	0	0	3	0	1	0	50	50	9	9	4	1	4	8	17	15	2	3	0	1	0	0	9	1-0
837	Napoli-Milan	2020-11-22	1	3	3	8	0	0	0	1	0	3	1	3	59	41	19	14	9	7	8	5	8	16	3	4	1	0	0	0	7	1-2
838	Sassuolo-Inter	2020-11-28	1	3	3	9	0	0	0	1	0	3	0	3	61	39	11	10	3	4	6	2	13	16	3	1	0	0	0	0	4	0-3
839	Benevento-Juventus	2020-11-28	1	3	3	9	0	0	1	0	1	1	1	1	37	63	9	15	5	5	5	8	13	13	6	1	0	0	0	0	7	1-1
840	Atalanta-Hellas Verona	2020-11-28	1	3	3	9	0	0	0	1	0	3	0	2	58	42	15	7	6	3	4	1	12	15	2	3	0	0	1	0	4	0-2
841	Lazio-Udinese	2020-11-29	1	3	3	9	0	0	0	1	0	3	1	3	51	49	11	9	6	4	4	4	16	10	3	4	0	0	0	1	4	1-3
842	Bologna-Crotone	2020-11-29	1	3	3	9	0	1	0	0	3	0	1	0	47	53	11	6	7	1	10	3	15	18	2	4	0	0	0	0	4	1-0
843	Milan-Fiorentina	2020-11-29	1	3	3	9	0	1	0	0	3	0	2	0	48	52	12	5	5	3	3	6	15	15	2	4	0	0	0	2	4	2-0
844	Cagliari-Spezia	2020-11-29	1	3	3	9	0	0	1	0	1	1	2	2	46	54	11	12	4	5	4	5	16	18	0	4	0	0	1	0	5	2-1
845	Napoli-Roma	2020-11-29	1	3	3	9	0	1	0	0	3	0	4	0	54	46	16	7	9	1	11	4	3	11	1	2	0	0	0	0	0	4-0
846	Torino-Sampdoria	2020-11-30	1	3	3	9	0	0	1	0	1	1	2	2	54	46	13	9	8	2	6	2	17	17	1	2	0	0	0	0	4	2-2
847	Genoa-Parma	2020-11-30	1	3	3	9	0	0	0	1	0	3	1	2	51	49	12	8	5	3	2	2	12	16	2	2	0	0	0	0	7	1-2
848	Spezia-Lazio	2020-12-05	1	3	3	10	0	0	0	1	0	3	1	2	59	41	13	3	6	2	7	0	15	12	3	1	0	0	0	0	5	1-2
849	Juventus-Torino	2020-12-05	1	3	3	10	0	1	0	0	3	0	2	1	61	39	13	6	5	2	13	1	17	10	3	3	0	0	0	0	7	2-1
850	Inter-Bologna	2020-12-05	1	3	3	10	0	1	0	0	3	0	3	1	48	52	14	10	9	7	7	3	12	13	1	2	0	0	0	0	4	3-1
851	Hellas Verona-Cagliari	2020-12-06	1	3	3	10	0	0	1	0	1	1	1	1	49	51	14	11	6	5	7	5	11	14	2	0	0	0	0	0	3	1-1
852	Parma-Benevento	2020-12-06	1	3	3	10	0	0	1	0	1	1	0	0	54	46	7	6	0	4	6	3	13	12	4	4	0	0	0	0	4	0-0
853	Roma-Sassuolo	2020-12-06	1	3	3	10	0	0	1	0	1	1	0	0	47	53	14	6	5	2	12	5	10	12	5	3	1	0	0	0	5	0-0
854	Crotone-Napoli	2020-12-06	1	3	3	10	0	0	0	1	0	3	0	4	40	60	5	12	1	6	4	1	14	9	3	3	1	0	0	0	3	0-3
855	Sampdoria-Milan	2020-12-06	1	3	3	10	0	0	0	1	0	3	1	2	40	60	8	12	3	6	9	6	11	16	2	1	0	0	1	0	5	1-2
856	Fiorentina-Genoa	2020-12-07	1	3	3	10	0	0	1	0	1	1	1	1	55	45	18	3	8	3	5	1	7	20	2	2	0	0	0	0	9	0-1
857	Sassuolo-Benevento	2020-12-11	1	3	3	11	0	1	0	0	3	0	1	0	45	55	6	24	2	7	1	10	12	14	2	4	1	0	0	1	5	1-0
858	Crotone-Spezia	2020-12-12	1	3	3	11	0	1	0	0	3	0	4	1	47	53	8	10	7	5	1	4	16	14	3	3	0	0	0	0	7	3-1
859	Torino-Udinese	2020-12-12	1	3	3	11	0	0	0	1	0	3	2	3	59	41	7	9	5	3	2	2	9	17	3	3	0	0	0	0	5	2-3
860	Lazio-Hellas Verona	2020-12-12	1	3	3	11	0	0	0	1	0	3	1	2	60	40	11	4	5	3	5	3	13	15	5	3	0	0	0	0	7	1-2
861	Cagliari-Inter	2020-12-13	1	3	3	11	0	0	0	1	0	3	1	3	44	56	7	20	2	11	3	9	10	17	2	1	0	0	0	0	5	1-2
862	Atalanta-Fiorentina	2020-12-13	1	3	3	11	0	1	0	0	3	0	3	0	52	48	14	3	10	2	11	2	17	13	1	2	0	0	0	0	3	3-0
863	Bologna-Roma	2020-12-13	1	3	3	11	0	0	0	1	0	3	1	5	55	45	6	13	1	8	1	5	16	9	4	2	0	0	0	0	2	1-5
864	Napoli-Sampdoria	2020-12-13	1	3	3	11	0	1	0	0	3	0	2	1	64	36	17	7	8	3	7	5	7	13	3	4	0	0	0	0	5	2-1
865	Genoa-Juventus	2020-12-13	1	3	3	11	0	0	0	1	0	3	1	3	29	71	3	17	2	9	0	10	14	14	3	3	0	0	2	0	3	1-3
866	Milan-Parma	2020-12-15	1	3	3	11	0	0	1	0	1	1	2	2	67	33	21	5	10	3	13	1	12	14	3	3	0	0	0	0	4	1-2
867	Udinese-Crotone	2020-12-15	1	3	3	12	0	0	1	0	1	1	0	0	57	43	13	4	6	2	9	1	13	17	1	4	0	0	0	0	3	0-0
868	Benevento-Lazio	2020-12-16	1	3	3	12	0	0	1	0	1	1	1	1	37	63	10	11	6	3	4	8	15	15	2	2	1	0	0	0	4	1-1
869	Juventus-Atalanta	2020-12-16	1	3	3	12	0	0	1	0	1	1	1	1	54	46	12	14	7	6	2	6	13	18	3	2	0	0	0	1	5	1-1
870	Fiorentina-Sassuolo	2020-12-16	1	3	3	12	0	0	1	0	1	1	1	1	47	53	13	12	7	7	4	1	19	11	4	4	0	0	0	1	3	1-1
871	Genoa-Milan	2020-12-16	1	3	3	12	0	0	1	0	1	1	2	2	41	59	8	12	4	4	4	10	17	13	2	3	0	0	0	0	4	2-2
872	Hellas Verona-Sampdoria	2020-12-16	1	3	3	12	0	0	0	1	0	3	1	2	56	44	9	9	6	3	6	3	20	17	2	4	1	0	0	1	6	1-2
873	Inter-Napoli	2020-12-16	1	3	3	12	0	1	0	0	3	0	1	0	42	58	4	10	2	5	4	3	16	9	5	3	0	1	0	1	5	1-0
874	Parma-Cagliari	2020-12-16	1	3	3	12	0	0	1	0	1	1	0	0	57	43	15	7	3	4	8	5	13	11	1	1	0	0	0	0	5	0-0
875	Spezia-Bologna	2020-12-16	1	3	3	12	0	0	1	0	1	1	2	2	46	54	7	9	5	6	3	4	19	11	6	1	0	0	1	0	7	2-1
876	Roma-Torino	2020-12-17	1	3	3	12	0	1	0	0	3	0	3	1	59	41	14	16	8	8	4	2	21	16	4	3	0	1	0	1	4	3-1
877	Fiorentina-Hellas Verona	2020-12-19	1	3	3	13	0	0	1	0	1	1	1	1	60	40	7	5	1	3	4	1	10	16	2	2	0	0	1	1	4	1-1
878	Sampdoria-Crotone	2020-12-19	1	3	3	13	0	1	0	0	3	0	3	1	44	56	6	5	4	3	3	1	14	15	2	2	0	0	1	0	4	3-1
879	Parma-Juventus	2020-12-19	1	3	3	13	0	0	0	1	0	3	0	4	37	63	9	14	5	7	4	9	8	10	0	1	0	0	0	0	2	0-4
880	Torino-Bologna	2020-12-20	1	3	3	13	0	0	1	0	1	1	1	1	54	46	13	14	5	9	4	8	16	17	1	3	0	0	0	0	4	1-1
881	Benevento-Genoa	2020-12-20	1	3	3	13	0	1	0	0	3	0	2	0	40	60	13	8	3	2	6	5	9	22	1	3	0	0	0	1	4	2-0
882	Cagliari-Udinese	2020-12-20	1	3	3	13	0	0	1	0	1	1	1	1	55	45	10	13	3	5	5	6	13	13	2	1	0	0	0	0	4	1-1
883	Inter-Spezia	2020-12-20	1	3	3	13	0	1	0	0	3	0	2	1	41	59	9	7	5	1	3	2	10	9	1	2	0	0	0	1	5	2-0
884	Sassuolo-Milan	2020-12-20	1	3	3	13	0	0	0	1	0	3	1	2	67	33	13	11	6	5	6	4	11	12	1	3	0	0	0	0	7	1-2
885	Atalanta-Roma	2020-12-20	1	3	3	13	0	1	0	0	3	0	4	1	56	44	12	5	8	4	2	2	15	14	2	3	0	0	0	0	1	4-1
886	Lazio-Napoli	2020-12-20	1	3	3	13	0	1	0	0	3	0	2	0	43	57	9	11	2	6	4	9	12	8	4	3	0	0	0	0	4	2-0
887	Crotone-Parma	2020-12-22	1	3	3	14	0	1	0	0	3	0	2	1	55	45	10	15	6	7	3	6	16	22	4	6	0	0	0	0	8	2-1
888	Juventus-Fiorentina	2020-12-22	1	3	3	14	0	0	0	1	0	3	0	3	53	47	10	9	3	6	5	5	9	18	1	4	1	0	0	0	0	0-3
889	Hellas Verona-Inter	2020-12-23	1	3	3	14	0	0	0	1	0	3	1	2	42	58	6	11	2	5	2	7	15	19	4	2	0	0	0	0	4	1-2
890	Bologna-Atalanta	2020-12-23	1	3	3	14	0	0	1	0	1	1	2	2	45	55	8	9	5	6	1	5	12	14	2	2	0	0	1	0	3	2-2
891	Milan-Lazio	2020-12-23	1	3	3	14	0	1	0	0	3	0	3	2	42	58	13	14	5	9	4	6	9	14	2	4	0	0	1	1	4	2-2
892	Napoli-Torino	2020-12-23	1	3	3	14	0	0	1	0	1	1	1	1	57	43	15	8	6	3	4	3	19	16	3	3	0	0	0	0	6	0-1
893	Roma-Cagliari	2020-12-23	1	3	3	14	0	1	0	0	3	0	3	2	61	39	14	6	9	3	6	0	18	20	3	2	0	0	1	0	4	3-1
894	Sampdoria-Sassuolo	2020-12-23	1	3	3	14	0	0	0	1	0	3	2	3	51	49	19	12	6	8	14	6	10	12	2	4	1	0	0	0	6	2-3
895	Spezia-Genoa	2020-12-23	1	3	3	14	0	0	0	1	0	3	1	2	65	35	8	7	5	6	4	2	19	20	3	4	0	0	1	0	6	1-2
896	Udinese-Benevento	2020-12-23	1	3	3	14	0	0	0	1	0	3	0	2	66	34	9	4	3	2	7	1	20	12	1	2	0	0	0	0	5	0-2
897	Inter-Crotone	2021-01-03	1	3	3	15	0	1	0	0	3	0	6	2	48	52	14	9	8	4	3	3	9	7	0	3	0	0	1	0	1	6-2
898	Atalanta-Sassuolo	2021-01-03	1	3	3	15	0	1	0	0	3	0	5	1	49	51	21	9	8	4	8	4	13	9	3	1	0	0	0	0	3	5-1
899	Cagliari-Napoli	2021-01-03	1	3	3	15	0	0	0	1	0	3	1	4	42	58	7	30	1	12	3	8	11	6	4	1	1	0	1	0	0	1-4
900	Fiorentina-Bologna	2021-01-03	1	3	3	15	0	0	1	0	1	1	0	0	45	55	10	6	1	4	8	5	8	11	4	3	0	0	0	0	3	0-0
901	Genoa-Lazio	2021-01-03	1	3	3	15	0	0	1	0	1	1	1	1	35	65	8	13	3	4	4	9	11	18	2	4	0	0	1	0	4	1-1
902	Parma-Torino	2021-01-03	1	3	3	15	0	0	0	1	0	3	0	3	59	41	15	14	6	8	9	3	20	16	2	2	0	0	0	0	6	0-2
903	Roma-Sampdoria	2021-01-03	1	3	3	15	0	1	0	0	3	0	1	0	64	36	16	4	8	2	9	2	18	14	3	5	0	0	0	0	3	1-0
904	Spezia-Hellas Verona	2021-01-03	1	3	3	15	0	0	0	1	0	3	0	1	54	46	6	11	1	4	3	5	22	10	6	0	1	0	0	0	4	0-1
905	Benevento-Milan	2021-01-03	1	3	3	15	0	0	0	1	0	3	0	2	51	49	24	10	7	5	12	4	9	14	1	3	0	1	1	1	4	0-2
906	Juventus-Udinese	2021-01-03	1	3	3	15	0	1	0	0	3	0	4	1	60	40	16	10	10	7	7	1	14	8	3	0	0	0	0	0	4	3-1
907	Cagliari-Benevento	2021-01-06	1	3	3	16	0	0	0	1	0	3	1	2	69	31	10	9	5	3	7	6	18	12	4	3	1	0	0	0	7	1-2
908	Atalanta-Parma	2021-01-06	1	3	3	16	0	1	0	0	3	0	3	0	50	50	17	3	6	1	12	3	10	6	1	1	0	0	0	0	2	3-0
909	Bologna-Udinese	2021-01-06	1	3	3	16	0	0	1	0	1	1	2	2	40	60	10	12	7	9	4	6	16	13	4	3	1	0	0	0	5	2-1
910	Crotone-Roma	2021-01-06	1	3	3	16	0	0	0	1	0	3	1	3	51	49	12	10	5	5	3	4	15	17	2	3	0	0	1	0	4	1-3
911	Lazio-Fiorentina	2021-01-06	1	3	3	16	0	1	0	0	3	0	2	1	50	50	11	9	6	8	2	9	11	11	3	1	0	0	1	0	6	2-1
912	Sampdoria-Inter	2021-01-06	1	3	3	16	0	1	0	0	3	0	2	1	38	62	8	23	6	11	4	11	13	18	3	4	0	0	1	1	6	2-1
913	Sassuolo-Genoa	2021-01-06	1	3	3	16	0	1	0	0	3	0	2	1	64	36	13	7	6	3	8	2	14	10	3	3	0	0	0	0	4	2-1
914	Torino-Hellas Verona	2021-01-06	1	3	3	16	0	0	1	0	1	1	1	1	47	53	15	8	5	2	9	3	12	18	1	3	0	0	0	0	4	1-1
915	Napoli-Spezia	2021-01-06	1	3	3	16	0	0	0	1	0	3	1	2	57	43	27	8	11	4	10	2	9	16	2	5	0	1	1	0	6	1-2
916	Milan-Juventus	2021-01-06	1	3	3	16	0	0	0	1	0	3	1	3	45	55	18	13	8	10	7	4	17	12	1	2	0	0	0	0	5	1-3
917	Benevento-Atalanta	2021-01-09	1	3	3	17	0	0	0	1	0	3	1	4	39	61	4	26	2	15	1	11	13	21	3	2	0	0	0	0	3	1-4
918	Genoa-Bologna	2021-01-09	1	3	3	17	0	1	0	0	3	0	2	0	34	66	9	12	7	4	1	4	11	9	2	0	0	0	0	0	3	2-0
919	Milan-Torino	2021-01-09	1	3	3	17	0	1	0	0	3	0	2	0	54	46	8	8	4	4	7	5	22	15	6	2	0	0	0	1	6	2-0
920	Roma-Inter	2021-01-10	1	3	3	17	0	0	1	0	1	1	2	2	50	50	14	16	8	6	3	7	18	11	3	3	0	0	0	0	5	2-2
921	Hellas Verona-Crotone	2021-01-10	1	3	3	17	0	1	0	0	3	0	2	1	47	53	11	7	7	3	6	4	16	16	3	3	0	0	0	0	3	2-1
922	Parma-Lazio	2021-01-10	1	3	3	17	0	0	0	1	0	3	0	2	48	52	9	21	3	5	5	6	11	7	4	1	0	0	0	0	3	0-2
923	Udinese-Napoli	2021-01-10	1	3	3	17	0	0	0	1	0	3	1	2	40	60	17	15	8	6	2	7	19	6	3	1	0	0	1	0	5	1-2
924	Fiorentina-Cagliari	2021-01-10	1	3	3	17	0	1	0	0	3	0	1	0	47	53	12	9	5	3	9	5	15	14	1	3	0	0	1	0	4	1-0
925	Juventus-Sassuolo	2021-01-10	1	3	3	17	0	1	0	0	3	0	3	1	57	43	20	10	10	2	6	3	11	4	4	1	0	1	0	0	3	2-1
926	Spezia-Sampdoria	2021-01-11	1	3	3	17	0	1	0	0	3	0	2	1	59	41	8	6	4	4	4	2	17	15	4	3	0	0	0	1	7	2-1
/	Lazio-Roma	2021-01-15	1	3	3	18	same-stadium derby
927	Bologna-Hellas Verona	2021-01-16	1	3	3	18	0	1	0	0	3	0	1	0	47	53	18	8	6	1	7	3	15	10	2	1	0	0	0	1	6	1-0
928	Torino-Spezia	2021-01-16	1	3	3	18	0	0	1	0	1	1	0	0	66	34	8	6	2	3	6	2	12	14	3	4	0	1	0	0	5	0-0
929	Sampdoria-Udinese	2021-01-16	1	3	3	18	0	1	0	0	3	0	2	1	53	47	16	14	9	7	11	5	8	11	1	1	0	0	0	1	4	2-1
930	Napoli-Fiorentina	2021-01-17	1	3	3	18	0	1	0	0	3	0	6	0	50	50	10	10	7	3	1	4	11	15	1	0	0	0	0	1	0	6-0
931	Crotone-Benevento	2021-01-17	1	3	3	18	0	1	0	0	3	0	4	1	48	52	6	14	3	6	4	13	14	14	1	3	0	1	0	0	3	4-1
932	Sassuolo-Parma	2021-01-17	1	3	3	18	0	0	1	0	1	1	1	1	51	49	15	11	6	2	5	2	18	11	3	2	0	0	0	1	5	0-1
933	Atalanta-Genoa	2021-01-17	1	3	3	18	0	0	1	0	1	1	0	0	63	37	15	6	4	3	9	1	15	13	1	2	0	0	0	0	6	0-0
934	Inter-Juventus	2021-01-17	1	3	3	18	0	1	0	0	3	0	2	0	48	52	16	8	6	4	3	4	8	14	2	2	0	0	0	0	5	2-0
935	Cagliari-Milan	2021-01-18	1	3	3	18	0	0	0	1	0	3	0	2	44	56	17	9	2	8	7	4	9	13	2	3	0	1	1	0	5	0-2
936	Udinese-Atalanta	2021-01-20	1	3	3	10 (recovery)	0	0	1	0	1	1	1	1	43	57	6	18	1	8	2	7	20	26	3	2	0	0	0	0	6	1-1
937	Benevento-Torino	2021-01-22	1	3	3	19	0	0	1	0	1	1	2	2	40	60	10	14	3	6	6	4	18	22	1	3	0	0	0	1	6	2-1
938	Roma-Spezia	2021-01-23	1	3	3	19	0	1	0	0	3	0	4	3	47	53	13	5	8	3	3	1	12	13	3	1	0	0	0	0	4	3-3
939	Milan-Atalanta	2021-01-23	1	3	3	19	0	0	0	1	0	3	0	3	51	49	10	19	3	10	5	7	11	14	2	1	0	0	1	0	7	0-3
940	Udinese-Inter	2021-01-23	1	3	3	19	0	0	1	0	1	1	0	0	44	56	6	10	1	4	3	4	11	16	3	2	0	0	0	0	5	0-0
941	Fiorentina-Crotone	2021-01-23	1	3	3	19	0	1	0	0	3	0	2	1	47	53	12	7	6	3	5	3	11	17	2	2	0	0	0	0	5	2-1
942	Juventus-Bologna	2021-01-24	1	3	3	19	0	1	0	0	3	0	2	0	53	47	22	12	12	3	7	6	11	17	3	2	0	0	0	0	3	2-0
943	Genoa-Cagliari	2021-01-24	1	3	3	19	0	1	0	0	3	0	1	0	41	59	8	13	6	7	4	7	11	6	1	2	0	0	0	0	5	1-0
944	Hellas Verona-Napoli	2021-01-24	1	3	3	19	0	1	0	0	3	0	3	1	47	53	15	12	7	4	3	2	13	8	2	3	0	0	0	0	4	3-1
945	Lazio-Sassuolo	2021-01-24	1	3	3	19	0	1	0	0	3	0	2	1	50	50	18	5	8	1	9	6	16	15	2	3	0	0	0	0	3	2-1
946	Parma-Sampdoria	2021-01-24	1	3	3	19	0	0	0	1	0	3	0	2	51	49	11	11	7	4	5	4	14	14	1	1	0	0	0	0	3	0-2
947	Torino-Fiorentina	2021-01-29	1	3	3	20	0	0	1	0	1	1	1	1	49	51	15	9	6	3	7	2	20	15	2	2	0	2	0	0	8	1-1
948	Bologna-Milan	2021-01-30	1	3	3	20	0	0	0	1	0	3	1	2	47	53	10	17	5	13	6	4	13	12	2	1	0	0	2	0	4	1-2
949	Sampdoria-Juventus	2021-01-30	1	3	3	20	0	0	0	1	0	3	0	2	41	59	6	10	2	4	5	8	11	10	4	2	0	0	0	0	5	0-1
950	Inter-Benevento	2021-01-30	1	3	3	20	0	1	0	0	3	0	4	0	64	36	13	0	8	0	7	3	9	14	0	2	0	0	0	0	0	4-0
951	Spezia-Udinese	2021-01-31	1	3	3	20	0	0	0	1	0	3	0	1	61	39	9	6	5	4	2	2	18	19	6	4	1	1	1	0	5	0-1
952	Atalanta-Lazio	2021-01-31	1	3	3	20	0	0	0	1	0	3	1	3	54	46	8	15	4	7	2	2	12	20	0	2	0	0	0	0	4	1-3
953	Cagliari-Sassuolo	2021-01-31	1	3	3	20	0	0	1	0	1	1	1	1	29	71	9	14	6	5	3	14	10	11	2	3	0	0	0	0	4	1-0
954	Crotone-Genoa	2021-01-31	1	3	3	20	0	0	0	1	0	3	0	3	49	51	9	10	4	6	3	11	15	22	3	1	0	0	0	0	3	0-3
955	Napoli-Parma	2021-01-31	1	3	3	20	0	1	0	0	3	0	2	0	45	55	10	4	6	1	7	6	15	17	2	4	0	0	0	0	4	2-0
956	Roma-Hellas Verona	2021-01-31	1	3	3	20	0	1	0	0	3	0	3	1	52	48	15	6	6	2	4	6	15	11	2	1	0	0	0	0	3	3-1
957	Fiorentina-Inter	2021-02-05	1	3	3	21	0	0	0	1	0	3	0	2	46	54	15	14	4	7	7	7	9	10	3	1	0	0	0	0	4	0-2
958	Atalanta-Torino	2021-02-06	1	3	3	21	0	0	1	0	1	1	3	3	55	45	10	19	5	11	4	3	24	17	3	2	0	0	1	0	5	3-3
959	Sassuolo-Spezia	2021-02-06	1	3	3	21	0	0	0	1	0	3	1	2	56	44	8	13	4	7	5	5	20	15	2	3	0	0	0	0	5	1-2
960	Juventus-Roma	2021-02-06	1	3	3	21	0	1	0	0	3	0	2	0	50	50	3	14	3	3	2	9	9	13	2	2	0	0	0	0	5	2-0
961	Genoa-Napoli	2021-02-06	1	3	3	21	0	1	0	0	3	0	2	1	32	68	4	24	2	11	1	6	13	11	2	2	0	0	0	0	4	2-1
962	Benevento-Sampdoria	2021-02-07	1	3	3	21	0	0	1	0	1	1	1	1	37	63	9	10	3	5	2	10	17	14	4	2	0	0	0	0	5	1-1
963	Milan-Crotone	2021-02-07	1	3	3	21	0	1	0	0	3	0	4	0	52	48	21	9	12	2	8	6	17	9	3	1	0	0	0	0	1	4-0
964	Udinese-Hellas Verona	2021-02-07	1	3	3	21	0	1	0	0	3	0	2	0	51	49	14	5	8	1	10	8	9	15	2	4	0	0	0	0	4	1-0
965	Parma-Bologna	2021-02-07	1	3	3	21	0	0	0	1	0	3	0	3	56	44	16	15	8	7	5	1	13	13	2	1	0	0	0	0	4	0-2
966	Lazio-Cagliari	2021-02-07	1	3	3	21	0	1	0	0	3	0	1	0	61	39	14	7	6	3	12	2	16	14	2	2	0	0	0	0	5	1-0
967	Bologna-Benevento	2021-02-12	1	3	3	22	0	0	1	0	1	1	1	1	58	42	11	13	3	8	8	3	17	10	3	2	0	0	0	0	5	1-1
968	Torino-Genoa	2021-02-13	1	3	3	22	0	0	1	0	1	1	0	0	48	52	10	6	2	3	3	5	13	15	2	4	0	0	0	0	3	0-0
969	Napoli-Juventus	2021-02-13	1	3	3	22	0	1	0	0	3	0	1	0	40	60	10	22	3	6	3	9	9	18	2	3	0	0	0	1	6	1-0
970	Spezia-Milan	2021-02-13	1	3	3	22	0	1	0	0	3	0	2	0	48	52	15	7	5	0	5	2	18	14	3	1	0	0	0	0	4	2-0
971	Roma-Udinese	2021-02-14	1	3	3	22	0	1	0	0	3	0	3	0	54	46	12	6	8	1	7	2	17	7	2	0	0	0	0	1	5	2-0
972	Cagliari-Atalanta	2021-02-14	1	3	3	22	0	0	0	1	0	3	0	1	39	61	4	10	1	5	6	6	17	14	3	3	0	0	0	0	6	0-1
973	Sampdoria-Fiorentina	2021-02-14	1	3	3	22	0	1	0	0	3	0	2	1	52	48	7	15	3	7	6	7	14	11	1	3	0	0	0	0	6	2-1
974	Crotone-Sassuolo	2021-02-14	1	3	3	22	0	0	0	1	0	3	1	2	39	61	9	21	6	4	7	8	15	17	1	1	0	0	1	0	5	1-2
975	Inter-Lazio	2021-02-14	1	3	3	22	0	1	0	0	3	0	3	1	39	61	11	12	7	7	4	0	7	4	2	1	0	0	0	1	4	3-1
976	Hellas Verona-Parma	2021-02-15	1	3	3	22	0	1	0	0	3	0	2	1	50	50	11	13	5	4	4	4	16	15	4	2	0	0	1	0	6	2-1
977	Fiorentina-Spezia	2021-02-19	1	3	3	23	0	1	0	0	3	0	3	0	41	59	10	11	5	3	0	6	20	11	4	0	0	0	0	0	5	3-0
978	Cagliari-Torino	2021-02-19	1	3	3	23	0	0	0	1	0	3	0	1	50	50	18	10	4	6	8	3	20	19	3	2	0	0	0	0	5	0-1
979	Lazio-Sampdoria	2021-02-20	1	3	3	23	0	1	0	0	3	0	1	0	56	44	11	11	8	2	4	5	14	17	4	3	0	0	0	0	5	1-0
980	Genoa-Hellas Verona	2021-02-20	1	3	3	23	0	0	1	0	1	1	2	2	48	52	12	9	4	4	5	1	11	17	1	1	0	0	0	0	7	1-2
981	Sassuolo-Bologna	2021-02-20	1	3	3	23	0	0	1	0	1	1	1	1	72	28	32	4	11	2	10	6	14	8	1	0	0	1	0	0	4	1-1
982	Parma-Udinese	2021-02-21	1	3	3	23	0	0	1	0	1	1	2	2	45	55	15	12	6	3	3	2	18	15	7	4	0	0	0	1	5	2-2
/	Milan-Inter	2021-02-21	1	3	3	23	same-stadium derby
983	Atalanta-Napoli	2021-02-21	1	3	3	23	0	1	0	0	3	0	4	2	49	51	15	5	7	4	6	2	20	11	2	1	0	0	0	0	6	4-2
984	Benevento-Roma	2021-02-21	1	3	3	23	0	0	1	0	1	1	0	0	35	65	6	14	3	8	1	9	11	18	4	1	1	0	0	0	8	0-0
985	Juventus-Crotone	2021-02-22	1	3	3	23	0	1	0	0	3	0	3	0	60	40	26	16	9	3	7	3	18	9	3	1	0	0	0	0	3	3-0
986	Spezia-Parma	2021-02-27	1	3	3	24	0	0	1	0	1	1	2	2	56	44	13	10	7	5	8	2	18	19	3	4	0	0	0	0	4	2-2
987	Bologna-Lazio	2021-02-27	1	3	3	24	0	1	0	0	3	0	2	0	42	58	14	20	8	7	4	7	9	18	1	2	0	0	1	0	5	2-0
988	Hellas Verona-Juventus	2021-02-27	1	3	3	24	0	0	1	0	1	1	1	1	39	61	13	15	6	6	8	5	18	14	2	2	0	0	0	0	3	1-1
989	Sampdoria-Atalanta	2021-02-28	1	3	3	24	0	0	0	1	0	3	0	2	50	50	7	20	3	11	5	6	7	17	1	3	0	0	0	0	3	0-2
990	Crotone-Cagliari	2021-02-28	1	3	3	24	0	0	0	1	0	3	0	2	53	47	11	9	4	4	7	4	17	14	2	4	0	1	1	0	4	0-2
991	Inter-Genoa	2021-02-28	1	3	3	24	0	1	0	0	3	0	3	0	54	46	23	3	14	2	9	1	12	8	0	2	0	0	0	0	3	3-0
992	Udinese-Fiorentina	2021-02-28	1	3	3	24	0	1	0	0	3	0	1	0	48	52	9	8	3	2	3	9	12	20	1	2	0	0	0	0	5	1-0
993	Napoli-Benevento	2021-02-28	1	3	3	24	0	1	0	0	3	0	2	0	62	38	20	4	8	4	8	2	13	15	3	2	1	0	0	0	4	2-0
994	Roma-Milan	2021-02-28	1	3	3	24	0	0	0	1	0	3	1	2	52	48	17	20	10	14	5	8	14	9	3	3	0	0	1	0	6	1-2
995	Juventus-Spezia	2021-03-02	1	3	3	25	0	1	0	0	3	0	3	0	46	54	20	10	9	2	5	10	14	13	2	0	0	0	1	0	6	3-0
996	Sassuolo-Napoli	2021-03-03	1	3	3	25	0	0	1	0	1	1	3	3	52	48	15	15	8	8	6	4	17	14	2	2	0	0	1	2	6	2-3
997	Atalanta-Crotone	2021-03-03	1	3	3	25	0	1	0	0	3	0	5	1	61	39	21	4	11	2	4	3	7	13	0	2	0	0	0	0	0	5-1
998	Benevento-Hellas Verona	2021-03-03	1	3	3	25	0	0	0	1	0	3	0	3	48	52	7	11	2	6	2	7	8	20	0	1	0	0	0	0	0	0-3
999	Cagliari-Bologna	2021-03-03	1	3	3	25	0	1	0	0	3	0	1	0	42	58	8	11	5	6	10	4	16	18	2	2	0	0	0	0	5	1-0
1000	Fiorentina-Roma	2021-03-03	1	3	3	25	0	0	0	1	0	3	1	2	47	53	6	12	2	6	2	3	10	15	1	2	0	0	0	0	5	1-2
/	Genoa-Sampdoria	2021-03-03	1	3	3	25	same-stadium derby
1001	Milan-Udinese	2021-03-03	1	3	3	25	0	0	1	0	1	1	1	1	61	39	11	6	7	2	7	2	23	13	4	1	0	0	0	1	7	0-1
1002	Parma-Inter	2021-03-04	1	3	3	25	0	0	0	1	0	3	1	2	53	47	11	12	3	8	2	2	8	11	0	1	0	0	0	0	5	1-2
1003	Spezia-Benevento	2021-03-06	1	3	3	26	0	0	1	0	1	1	1	1	72	28	14	5	7	2	3	1	13	17	2	4	0	0	0	0	6	1-1
1004	Udinese-Sassuolo	2021-03-06	1	3	3	26	0	1	0	0	3	0	2	0	36	64	12	8	8	2	5	6	10	11	1	0	0	0	0	0	5	1-0
1005	Juventus-Lazio	2021-03-06	1	3	3	26	0	1	0	0	3	0	3	1	50	50	8	13	5	5	4	4	10	13	0	1	0	0	0	1	4	3-1
1006	Roma-Genoa	2021-03-07	1	3	3	26	0	1	0	0	3	0	1	0	58	42	18	7	4	2	7	1	15	15	1	4	0	0	0	0	5	1-0
1007	Crotone-Torino	2021-03-07	1	3	3	26	0	1	0	0	3	0	4	2	47	53	19	17	10	6	8	8	19	22	4	2	0	1	0	1	5	3-2
1008	Fiorentina-Parma	2021-03-07	1	3	3	26	0	0	1	0	1	1	3	3	43	57	6	11	5	6	3	3	19	16	0	3	0	0	1	0	6	2-3
1009	Hellas Verona-Milan	2021-03-07	1	3	3	26	0	0	0	1	0	3	0	2	52	48	8	12	1	4	8	1	14	12	2	0	0	0	0	0	4	0-2
1010	Sampdoria-Cagliari	2021-03-07	1	3	3	26	0	0	1	0	1	1	2	2	54	46	11	10	5	5	3	5	15	14	4	3	0	0	0	0	6	2-1
1011	Napoli-Bologna	2021-03-07	1	3	3	26	0	1	0	0	3	0	3	1	45	55	15	17	8	7	6	3	12	13	2	0	0	0	0	0	5	3-1
1012	Inter-Atalanta	2021-03-08	1	3	3	26	0	1	0	0	3	0	1	0	46	54	5	10	1	3	7	7	11	17	0	1	0	0	0	0	4	1-0
1013	Lazio-Crotone	2021-03-12	1	3	3	27	0	1	0	0	3	0	3	2	59	41	23	6	9	3	5	1	10	11	0	3	0	0	1	0	4	3-2
1014	Atalanta-Spezia	2021-03-12	1	3	3	27	0	1	0	0	3	0	3	1	45	55	14	6	9	3	3	5	17	6	2	0	0	0	0	0	5	3-1
1015	Sassuolo-Hellas Verona	2021-03-13	1	3	3	27	0	1	0	0	3	0	3	2	43	57	14	12	8	7	6	5	15	18	3	2	0	0	0	0	4	3-2
1016	Benevento-Fiorentina	2021-03-13	1	3	3	27	0	0	0	1	0	3	1	4	59	41	16	11	6	7	8	3	15	18	3	1	0	0	0	0	3	1-4
1017	Genoa-Udinese	2021-03-13	1	3	3	27	0	0	1	0	1	1	1	1	55	45	10	9	3	3	6	3	14	6	3	1	0	0	1	0	3	1-1
1018	Bologna-Sampdoria	2021-03-14	1	3	3	27	0	1	0	0	3	0	3	1	45	55	10	20	7	9	2	6	16	11	2	2	0	0	0	0	4	3-1
1019	Parma-Roma	2021-03-14	1	3	3	27	0	1	0	0	3	0	2	0	42	58	5	20	4	6	0	12	18	16	3	3	0	0	0	1	4	2-0
1020	Torino-Inter	2021-03-14	1	3	3	27	0	0	0	1	0	3	1	2	37	63	6	13	4	4	1	8	11	12	0	1	0	0	1	0	3	1-2
1021	Cagliari-Juventus	2021-03-14	1	3	3	27	0	0	0	1	0	3	1	3	51	49	15	9	7	7	8	5	12	16	0	2	0	0	1	0	4	1-3
1022	Milan-Napoli	2021-03-14	1	3	3	27	0	0	0	1	0	3	0	1	55	45	12	14	4	5	5	4	12	10	1	2	1	0	0	0	6	0-1
1023	Torino-Sassuolo	2021-03-17	1	3	3	24 (recovery)	0	1	0	0	3	0	3	2	52	48	23	12	15	5	6	3	10	16	1	2	0	0	0	0	5	2-2
1024	Parma-Genoa	2021-03-19	1	3	3	28	0	0	0	1	0	3	1	2	59	41	12	7	9	3	1	3	22	8	5	2	0	0	0	0	5	1-2
1025	Crotone-Bologna	2021-03-20	1	3	3	28	0	0	0	1	0	3	2	3	52	48	15	19	7	10	10	3	11	16	4	7	0	0	0	1	3	2-3
1026	Spezia-Cagliari	2021-03-20	1	3	3	28	0	1	0	0	3	0	2	1	54	46	12	11	6	7	4	4	13	16	1	2	0	0	0	0	5	2-1
1027	Hellas Verona-Atalanta	2021-03-21	1	3	3	28	0	0	0	1	0	3	0	2	52	48	3	14	1	8	4	7	23	20	3	2	0	0	1	0	3	0-2
1028	Juventus-Benevento	2021-03-21	1	3	3	28	0	0	0	1	0	3	0	1	68	32	23	7	9	1	9	1	12	13	2	3	0	0	0	0	4	0-1
1029	Sampdoria-Torino	2021-03-21	1	3	3	28	0	1	0	0	3	0	1	0	38	62	7	9	5	1	1	7	15	18	0	1	0	0	0	0	6	1-0
1030	Udinese-Lazio	2021-03-21	1	3	3	28	0	0	0	1	0	3	0	1	51	49	14	16	6	8	6	11	9	13	1	3	0	0	0	0	5	0-1
1031	Fiorentina-Milan	2021-03-21	1	3	3	28	0	0	0	1	0	3	2	3	41	59	9	14	4	6	8	8	11	6	1	3	0	0	0	0	4	2-3
1032	Roma-Napoli	2021-03-21	1	3	3	28	0	0	0	1	0	3	0	2	53	47	7	10	5	5	6	4	18	13	5	3	0	0	0	0	5	0-2
1033	Milan-Sampdoria	2021-04-03	1	3	3	29	0	0	1	0	1	1	1	1	63	37	14	5	5	4	5	5	15	16	2	5	0	1	0	0	5	1-1
1034	Atalanta-Udinese	2021-04-03	1	3	3	29	0	1	0	0	3	0	3	2	48	52	22	8	11	4	4	1	15	19	0	2	0	0	0	0	3	3-2
1035	Benevanto-Parma	2021-04-03	1	3	3	29	0	0	1	0	1	1	2	2	33	67	4	15	4	7	3	3	21	18	2	1	0	0	0	0	7	2-2
1036	Cagliari-Hellas Verona	2021-04-03	1	3	3	29	0	0	0	1	0	3	0	2	55	45	15	9	4	5	6	5	17	18	1	3	0	0	0	0	9	0-1
1037	Genoa-Fiorentina	2021-04-03	1	3	3	29	0	0	1	0	1	1	1	1	55	45	8	11	2	3	4	2	17	10	2	1	0	1	0	0	5	1-1
1038	Lazio-Spezia	2021-04-03	1	3	3	29	0	1	0	0	3	0	2	1	49	51	11	7	5	3	3	4	18	21	3	3	2	0	0	1	8	2-1
1039	Napoli-Crotone	2021-04-03	1	3	3	29	0	1	0	0	3	0	4	3	62	38	28	8	11	4	4	6	5	17	0	4	0	0	0	0	5	4-3
1040	Sassuolo-Roma	2021-04-03	1	3	3	29	0	0	1	0	1	1	2	2	65	35	12	12	6	9	3	4	15	15	4	3	0	0	1	0	4	2-2
1041	Torino-Juventus	2021-04-03	1	3	3	29	0	0	1	0	1	1	2	2	34	66	10	18	7	9	5	6	16	15	3	2	0	0	0	0	4	2-2
1042	Bologna-Inter	2021-04-03	1	3	3	29	0	0	0	1	0	3	0	1	54	46	12	12	3	5	4	4	17	15	4	4	0	0	0	0	4	0-1
1043	Inter-Sassuolo	2021-04-07	1	3	3	28 (recovery)	0	1	0	0	3	0	2	1	32	68	8	14	5	5	1	8	8	13	2	3	0	0	0	0	4	2-1
1044	Juventus-Napoli	2021-04-07	1	3	3	3 (recovery)	0	1	0	0	3	0	2	1	48	52	12	15	3	5	2	6	17	12	1	2	0	0	1	0	5	2-1
1045	Spezia-Crotone	2021-04-10	1	3	3	30	0	1	0	0	3	0	3	2	56	44	9	9	7	6	3	4	12	15	1	1	0	0	0	0	5	2-2
1046	Parma-Milan	2021-04-10	1	3	3	30	0	0	0	1	0	3	1	3	61	39	15	11	5	7	7	3	14	11	4	4	0	1	0	0	5	1-2
1047	Udinese-Torino	2021-04-10	1	3	3	30	0	0	0	1	0	3	0	1	66	34	12	9	5	2	5	4	21	19	0	3	0	0	1	0	5	0-1
1048	Inter-Cagliari	2021-04-11	1	3	3	30	0	1	0	0	3	0	1	0	49	51	15	8	8	2	5	0	10	12	1	1	0	0	0	0	4	1-0
1049	Hellas Verona-Lazio	2021-04-11	1	3	3	30	0	0	0	1	0	3	0	1	42	58	4	14	1	5	5	4	15	13	0	2	0	0	0	0	4	0-1
1050	Juventus-Genoa	2021-04-11	1	3	3	30	0	1	0	0	3	0	3	1	59	41	23	11	14	3	8	6	15	11	3	3	0	0	0	0	4	3-1
1051	Sampdoria-Napoli	2021-04-11	1	3	3	30	0	0	0	1	0	3	0	2	45	55	11	20	5	9	8	7	14	10	0	3	0	0	0	0	6	0-2
1052	Roma-Bologna	2021-04-11	1	3	3	30	0	1	0	0	3	0	1	0	49	51	14	11	7	5	4	6	14	14	3	1	0	0	0	0	5	1-0
1053	Fiorentina-Atalanta	2021-04-11	1	3	3	30	0	0	0	1	0	3	2	3	41	59	8	14	2	9	0	6	15	13	3	1	0	0	1	0	4	2-3
1054	Benevento-Sassuolo	2021-04-12	1	3	3	30	0	0	0	1	0	3	0	1	36	64	9	14	5	4	3	8	12	14	3	2	0	0	0	0	4	0-1
1055	Crotone-Udinese	2021-04-17	1	3	3	31	0	0	0	1	0	3	1	2	52	48	7	14	3	7	5	7	12	19	0	2	0	1	0	1	6	1-2
1056	Sampdoria-Hellas Verona	2021-04-17	1	3	3	31	0	1	0	0	3	0	3	1	51	49	12	18	5	8	5	7	16	14	3	3	0	0	0	1	3	3-1
1057	Sassuolo-Fiorentina	2021-04-17	1	3	3	31	0	1	0	0	3	0	3	1	71	29	11	7	6	6	3	4	8	16	3	5	0	0	0	2	5	3-1
1058	Cagliari-Parma	2021-04-17	1	3	3	31	0	1	0	0	3	0	4	3	71	29	23	11	9	6	0	4	14	12	4	2	0	0	0	0	6	2-3
1059	Milan-Genoa	2021-04-18	1	3	3	31	0	1	0	0	3	0	2	1	59	41	18	11	5	6	5	4	10	13	0	1	0	0	0	0	4	2-1
1060	Atalanta-Juventus	2021-04-18	1	3	3	31	0	1	0	0	3	0	1	0	44	56	12	12	2	3	3	8	18	15	3	1	0	0	0	0	3	1-0
1061	Bologna-Spezia	2021-04-18	1	3	3	31	0	1	0	0	3	0	4	1	43	57	10	9	7	5	4	8	15	12	1	1	0	0	0	1	1	4-1
1062	Lazio-Benevento	2021-04-18	1	3	3	31	0	1	0	0	3	0	5	3	54	46	12	16	8	8	5	4	14	11	2	3	0	0	1	2	7	4-3
1063	Torino-Roma	2021-04-18	1	3	3	31	0	1	0	0	3	0	3	1	49	51	23	9	11	4	11	3	13	13	2	1	0	1	0	0	4	2-1
1064	Napoli-Inter	2021-04-18	1	3	3	31	0	0	1	0	1	1	1	1	55	45	12	10	3	5	3	3	12	12	5	2	0	0	0	0	5	1-1
1065	Hellas Verona-Fiorentina	2021-04-20	1	3	3	32	0	0	0	1	0	3	1	2	62	38	11	7	7	5	5	3	16	20	2	3	0	0	1	0	6	1-2
1066	Milan-Sassuolo	2021-04-21	1	3	3	32	0	0	0	1	0	3	1	2	49	51	18	15	7	7	3	7	18	13	0	1	0	0	0	0	3	1-2
1067	Bologna-Torino	2021-04-21	1	3	3	32	0	0	1	0	1	1	1	1	49	51	9	18	2	5	3	7	26	15	4	2	0	0	0	0	6	1-1
1068	Crotone-Sampdoria	2021-04-21	1	3	3	32	0	0	0	1	0	3	0	1	41	59	7	11	4	5	2	6	13	7	1	1	0	0	0	0	3	0-1
1069	Genoa-Benevento	2021-04-21	1	3	3	32	0	0	1	0	1	1	2	2	60	40	10	8	5	2	3	0	14	18	2	0	0	0	1	0	3	2-2
1070	Juventus-Parma	2021-04-21	1	3	3	32	0	1	0	0	3	0	3	1	62	38	14	10	8	4	6	6	12	18	2	2	0	0	0	0	4	3-1
1071	Spezia-Inter	2021-04-21	1	3	3	32	0	0	1	0	1	1	1	1	40	60	1	15	1	6	0	8	9	7	2	0	0	0	0	0	4	1-1
1072	Udinese-Cagliari	2021-04-21	1	3	3	32	0	0	0	1	0	3	0	1	58	42	14	13	4	5	2	5	11	15	0	2	0	0	1	0	5	0-1
1073	Roma-Atalanta	2021-04-22	1	3	3	32	0	0	1	0	1	1	1	1	61	39	14	22	3	9	4	8	16	7	4	2	1	1	0	0	6	1-1
1074	Napoli-Lazio	2021-04-22	1	3	3	32	0	1	0	0	3	0	5	2	54	46	10	14	8	4	2	2	7	18	4	4	0	0	0	1	4	5-2
1075	Genoa-Spezia	2021-04-24	1	3	3	33	0	1	0	0	3	0	2	0	35	65	11	7	6	1	0	3	18	14	2	2	0	0	0	0	5	2-0
1076	Parma-Crotone	2021-04-24	1	3	3	33	0	0	0	1	0	3	3	4	61	39	15	13	4	5	7	5	15	11	3	2	0	0	1	0	5	3-4
1077	Sassuolo-Sampdoria	2021-04-24	1	3	3	33	0	1	0	0	3	0	1	0	66	34	14	9	8	3	8	3	15	10	0	0	0	0	0	0	5	1-0
1078	Benevento-Udinese	2021-04-25	1	3	3	33	0	0	0	1	0	3	2	4	56	44	22	10	9	7	11	2	18	20	2	2	0	0	0	1	7	2-4
1079	Fiorentina-Juventus	2021-04-25	1	3	3	33	0	0	1	0	1	1	1	1	38	62	11	7	6	1	7	2	13	16	3	1	0	0	0	1	3	1-1
1080	Inter-Hellas Verona	2021-04-25	1	3	3	33	0	1	0	0	3	0	1	0	49	51	10	12	4	1	3	8	7	13	0	3	0	0	0	0	3	1-0
1081	Cagliari-Roma	2021-04-25	1	3	3	33	0	1	0	0	3	0	3	2	42	58	10	12	6	7	4	10	14	17	3	1	0	0	0	0	4	3-2
1082	Atalanta-Bologna	2021-04-25	1	3	3	33	0	1	0	0	3	0	5	0	55	45	26	9	12	3	8	3	11	8	0	1	0	1	0	1	0	5-0
1083	Torino-Napoli	2021-04-26	1	3	3	33	0	0	0	1	0	3	0	2	50	50	15	25	6	10	7	11	16	15	3	1	1	0	0	0	5	0-2
1084	Lazio-Milan	2021-04-26	1	3	3	33	0	1	0	0	3	0	3	0	43	57	14	15	6	6	1	9	10	11	2	0	0	0	0	0	3	3-0
1085	Hellas Verona-Spezia	2021-05-01	1	3	3	34	0	0	1	0	1	1	1	1	48	52	7	12	6	2	5	5	27	16	6	2	0	0	0	0	3	1-1
1086	Crotone-Inter	2021-05-01	1	3	3	34	0	0	0	1	0	3	0	2	40	60	6	23	1	10	4	11	10	9	1	2	0	0	0	0	4	0-1
1087	Milan-Benevento	2021-05-01	1	3	3	34	0	1	0	0	3	0	2	0	56	44	20	14	11	2	6	7	16	8	2	0	0	0	0	0	5	2-0
1088	Lazio-Genoa	2021-05-02	1	3	3	34	0	1	0	0	3	0	4	3	51	49	18	10	12	5	7	4	13	12	3	4	0	0	1	1	4	4-3
1089	Bologna-Fiorentina	2021-05-02	1	3	3	34	0	0	1	0	1	1	3	3	63	37	11	9	6	4	3	6	16	12	2	2	0	0	1	0	5	3-3
1090	Napoli-Cagliari	2021-05-02	1	3	3	34	0	0	1	0	1	1	1	1	56	44	18	12	6	7	3	1	8	14	1	3	0	0	0	0	7	1-0
1091	Sassuolo-Atalanta	2021-05-02	1	3	3	34	0	0	1	0	1	1	1	1	62	38	12	10	7	9	4	4	18	12	6	1	1	1	1	1	4	1-1
1092	Udinese-Juventus	2021-05-02	1	3	3	34	0	0	0	1	0	3	1	2	41	59	7	13	2	4	2	6	14	18	3	0	0	0	1	0	6	1-2
1093	Sampdoria-Roma	2021-05-02	1	3	3	34	0	1	0	0	3	0	2	0	53	47	12	10	9	5	8	8	14	13	0	3	0	0	1	0	3	2-0
1094	Torino-Parma	2021-05-03	1	3	3	34	0	1	0	0	3	0	1	0	53	47	13	8	5	1	5	2	10	17	0	3	0	0	0	0	3	1-0
1095	Spezia-Napoli	2021-05-08	1	3	3	35	0	0	0	1	0	3	1	4	52	48	6	13	3	7	1	2	15	18	3	2	0	0	0	0	4	1-4
1096	Udinese-Bologna	2021-05-08	1	3	3	35	0	0	1	0	1	1	1	1	48	52	9	16	5	4	5	10	12	18	1	1	0	0	1	0	4	1-1
1097	Inter-Sampdoria	2021-05-08	1	3	3	35	0	1	0	0	3	0	5	1	56	44	12	13	7	4	2	8	10	14	0	2	0	0	0	0	1	5-1
1098	Fiorentina-Lazio	2021-05-08	1	3	3	35	0	1	0	0	3	0	2	0	37	63	9	8	5	3	5	7	12	14	3	6	0	1	0	0	7	2-0
1099	Genoa-Sassuolo	2021-05-09	1	3	3	35	0	0	0	1	0	3	1	2	39	61	13	13	5	7	8	2	17	15	2	0	0	0	0	0	4	1-2
1100	Benevento-Cagliari	2021-05-09	1	3	3	35	0	0	0	1	0	3	1	3	58	42	7	7	7	4	4	5	17	20	1	2	0	0	0	0	6	1-2
1101	Hellas Verona-Torino	2021-05-09	1	3	3	35	0	0	1	0	1	1	1	1	59	41	19	6	7	4	9	3	16	22	3	3	0	0	0	0	6	1-1
1102	Parma-Atalanta	2021-05-09	1	3	3	35	0	0	0	1	0	3	2	5	43	57	5	18	2	13	1	3	12	15	1	1	0	0	0	0	4	2-4
1103	Roma-Crotone	2021-05-09	1	3	3	35	0	1	0	0	3	0	5	0	60	40	20	7	13	2	8	4	10	11	2	0	0	0	0	0	1	5-0
1104	Juventus-Milan	2021-05-09	1	3	3	35	0	0	0	1	0	3	0	3	54	46	16	11	4	6	8	2	17	12	2	2	0	0	1	0	4	0-3
1105	Napoli-Udinese	2021-05-11	1	3	3	36	0	1	0	0	3	0	5	1	52	48	21	5	12	2	8	3	8	14	0	1	0	0	0	0	2	4-1
1106	Cagliari-Fiorentina	2021-05-12	1	3	3	36	0	0	1	0	1	1	0	0	61	39	7	2	1	0	3	1	18	10	1	2	0	0	0	0	3	0-0
1107	Atalanta-Benevento	2021-05-12	1	3	3	36	0	1	0	0	3	0	2	0	68	32	14	3	4	1	7	5	19	11	2	5	0	1	0	0	3	2-0
1108	Bologna-Genoa	2021-05-12	1	3	3	36	0	0	0	1	0	3	0	2	63	37	17	12	8	9	12	4	9	11	1	2	0	0	1	0	4	0-2
1109	Inter-Roma	2021-05-12	1	3	3	36	0	1	0	0	3	0	3	1	49	51	13	17	5	6	5	8	4	12	0	4	0	0	0	0	3	3-1
1110	Lazio-Parma	2021-05-12	1	3	3	36	0	1	0	0	3	0	1	0	49	51	14	11	6	5	7	2	13	14	1	3	0	0	0	0	7	0-0
1111	Sampdoria-Spezia	2021-05-12	1	3	3	36	0	0	1	0	1	1	2	2	62	38	14	12	6	7	5	5	9	17	2	2	0	0	0	0	3	2-2
1112	Sassuolo-Juventus	2021-05-12	1	3	3	36	0	0	0	1	0	3	1	3	64	36	17	14	3	8	3	5	10	13	1	2	0	0	0	1	4	1-3
1113	Torino-Milan	2021-05-12	1	3	3	36	0	0	0	1	0	3	0	7	45	55	14	14	1	11	2	3	15	16	2	1	0	0	1	0	0	0-7
1114	Crotone-Hellas Verona	2021-05-13	1	3	3	36	0	1	0	0	3	0	2	1	44	56	9	11	4	2	0	8	20	11	3	1	0	0	0	0	4	2-1
1115	Genoa-Atalanta	2021-05-15	1	3	3	37	0	0	0	1	0	3	3	4	42	58	10	14	7	7	2	4	13	8	1	2	0	0	0	1	4	3-4
1116	Spezia-Torino	2021-05-15	1	3	3	37	0	1	0	0	3	0	4	1	44	56	14	6	11	3	3	6	25	17	3	5	0	0	1	1	6	4-1
1117	Juventus-Inter	2021-05-15	1	3	3	37	0	1	0	0	3	0	3	2	42	58	13	7	7	3	4	3	10	18	5	5	1	1	1	2	4	3-2
/	Roma-Lazio	2021-05-15	1	3	3	37	same-stadium derby
1118	Fiorentina-Napoli	2021-05-16	1	3	3	37	0	0	0	1	0	3	0	2	44	56	7	18	3	8	3	6	15	9	5	1	0	0	1	0	4	0-2
1119	Benevento-Crotone	2021-05-16	1	3	3	37	0	0	1	0	1	1	1	1	49	51	19	6	11	2	8	4	12	19	2	2	0	1	0	0	5	1-0
1120	Udinese-Sampdoria	2021-05-16	1	3	3	37	0	0	0	1	0	3	0	1	55	45	9	15	2	6	6	3	12	13	3	1	0	0	1	0	4	0-1
1121	Parma-Sassuolo	2021-05-16	1	3	3	37	0	0	0	1	0	3	1	3	46	54	16	15	8	12	2	12	13	13	1	0	0	0	1	0	4	1-3
1122	Milan-Cagliari	2021-05-16	1	3	3	37	0	0	1	0	1	1	0	0	62	38	20	6	4	2	9	7	8	8	2	2	0	0	0	0	5	0-0
1123	Hellas Verona-Bologna	2021-05-17	1	3	3	37	0	0	1	0	1	1	2	2	53	47	11	13	5	5	4	4	19	17	3	3	0	0	0	0	4	2-2
1124	Lazio-Torino	2021-05-18	1	3	3	25 (recovery)	0	0	1	0	1	1	0	0	66	34	21	6	11	4	4	0	11	13	4	0	0	0	0	1	8	0-0
1125	Cagliari-Genoa	2021-05-22	1	3	3	38	0	0	0	1	0	3	0	1	51	49	16	11	7	5	8	4	9	13	1	4	0	1	0	0	6	0-1
1126	Crotone-Fiorentina	2021-05-22	1	3	3	38	0	0	1	0	1	1	0	0	57	43	12	11	4	3	6	5	11	10	2	2	0	0	0	0	2	0-0
1127	Sampdoria-Parma	2021-05-22	1	3	3	38	0	1	0	0	3	0	3	0	45	55	12	11	4	1	3	4	10	12	1	1	0	0	0	0	0	3-0
1128	Inter-Udinese	2021-05-23	1	3	3	38	1000	1	0	0	3	0	5	1	49	51	14	8	9	2	3	2	13	16	1	0	0	0	1	1	0	5-1
1129	Atalanta-Milan	2021-05-23	1	3	3	38	0	0	0	1	0	3	0	2	68	32	11	7	1	3	3	0	17	11	3	2	1	0	2	0	5	0-1
1130	Bologna-Juventus	2021-05-23	1	3	3	38	0	0	0	1	0	3	1	4	44	56	18	19	5	11	3	0	7	16	1	2	0	0	0	0	2	1-4
1131	Napoli-Hellas Verona	2021-05-23	1	3	3	38	0	0	1	0	1	1	1	1	53	47	16	7	3	4	5	3	13	25	3	4	0	0	0	0	5	1-1
1132	Sassuolo-Lazio	2021-05-23	1	3	3	38	0	1	0	0	3	0	2	0	56	44	10	9	5	2	3	3	12	15	2	1	1	0	0	1	4	2-0
1133	Spezia-Roma	2021-05-23	1	3	3	38	0	0	1	0	1	1	2	2	42	58	18	14	9	10	5	2	13	14	0	1	0	0	0	0	4	2-2
1134	Torino-Benevento	2021-05-23	1	3	3	38	0	0	1	0	1	1	1	1	49	51	12	9	7	3	7	3	17	10	0	2	0	0	0	0	5	1-1
1135	FC Bayern München-FC Schalke 04	2020-09-18	1	4	4	1	0	1	0	0	3	0	8	0	61	39	22	5	12	1	9	2	11	12	1	2	0	0	0	1	0	8-0
1136	Eintracht Frankfurt-DSC Arminia Bielefeld	2020-09-19	1	4	4	1	6500	0	1	0	1	1	1	1	59	41	18	14	6	5	14	3	14	13	2	2	0	0	0	0	6	1-1
1137	1. FC Union Berlin-FC Augsburg	2020-09-19	1	4	4	1	4600	0	0	1	0	3	1	3	56	44	13	9	3	5	8	1	9	9	2	0	0	0	0	0	6	1-3
1138	1. FC Köln-TSG Hoffenheim	2020-09-19	1	4	4	1	0	0	0	1	0	3	2	3	48	52	13	13	6	7	1	6	12	13	3	4	0	0	1	0	6	2-2
1139	SV Werder Bremen-Herta Berlin	2020-09-19	1	4	4	1	8400	0	0	1	0	3	1	4	42	58	17	13	7	6	7	4	13	17	2	0	0	0	0	0	5	1-4
1140	VfB Stuttgart-Sport-Club Freiburg	2020-09-19	1	4	4	1	8000	0	0	1	0	3	2	3	59	41	22	7	7	6	7	2	12	16	2	2	0	0	0	0	8	2-3
1141	Borussia Dortmund-B. Mönchengladbach	2020-09-19	1	4	4	1	9300	1	0	0	3	0	3	0	48	52	9	8	4	2	1	3	10	9	1	1	0	0	0	1	0	3-0
1142	RB Leipzig-1. FSV Mainz 05	2020-09-20	1	4	4	1	8500	1	0	0	3	0	3	1	68	32	23	8	10	1	7	5	5	11	1	2	0	0	0	1	3	3-1
1143	VfL Wolfsburg-Bayer 04 Leverkusen	2020-09-20	1	4	4	1	500	0	1	0	1	1	0	0	42	58	9	6	1	2	4	4	13	12	1	2	0	0	0	0	3	0-0
1144	Herta Berlin-Eintracht Frankfurt	2020-09-25	1	4	4	2	4000	0	0	1	0	3	1	3	57	43	12	10	6	3	4	3	13	16	3	4	0	0	1	0	4	1-3
1145	B. Mönchengladbach-1. FC Union Berlin	2020-09-26	1	4	4	2	10383	0	1	0	1	1	1	1	60	40	14	15	5	2	7	5	11	15	1	2	0	0	0	0	3	1-1
1146	Bayer 04 Leverkusen-RB Leipzig	2020-09-26	1	4	4	2	6000	0	1	0	1	1	1	1	59	41	11	7	4	2	4	1	16	10	1	3	0	0	0	0	5	1-1
1147	1. FSV Mainz 05-VfB Stuttgart	2020-09-26	1	4	4	2	3403	0	0	1	0	3	1	4	52	48	11	15	3	7	3	9	10	17	2	4	1	1	0	0	3	1-4
1148	FC Augsburg-Borussia Dortmund	2020-09-26	1	4	4	2	6000	1	0	0	3	0	2	0	29	71	6	16	4	7	3	11	7	8	3	4	0	0	0	0	5	2-0
1149	DSC Arminia Bielefeld-1. FC Köln	2020-09-26	1	4	4	2	5460	1	0	0	3	0	1	0	50	50	7	12	3	2	4	7	12	15	3	3	0	0	0	0	4	1-0
1150	FC Schalke 04-SV Werder Bremen	2020-09-26	1	4	4	2	0	0	0	1	0	3	1	3	62	38	17	17	4	8	8	3	20	14	7	2	1	0	1	0	3	0-3
1151	TSG Hoffenheim-FC Bayern München	2020-09-27	1	4	4	2	6030	1	0	0	3	0	4	1	28	72	17	14	8	2	3	5	15	11	3	2	0	0	0	1	4	3-1
1152	Sport-Club Freiburg-VfL Wolfsburg	2020-09-27	1	4	4	2	3200	0	1	0	1	1	1	1	52	48	21	8	7	2	9	1	10	13	0	3	0	0	0	0	5	1-1
1153	1. FC Union Berlin-1. FSV Mainz 05	2020-10-02	1	4	4	3	4400	1	0	0	3	0	4	0	49	51	13	5	7	0	4	2	13	11	1	4	0	0	0	0	1	4-0
1154	Borussia Dortmund-Sport-Club Freiburg	2020-10-03	1	4	4	3	11500	1	0	0	3	0	4	0	63	37	16	6	7	2	3	2	8	12	1	1	0	0	0	0	4	3-0
1155	Eintracht Frankfurt-TSG Hoffenheim	2020-10-03	1	4	4	3	8000	1	0	0	3	0	2	1	50	50	15	11	8	4	5	7	12	8	2	3	0	0	0	0	4	2-1
1156	1. FC Köln-B. Mönchengladbach	2020-10-03	1	4	4	3	300	0	0	1	0	3	1	3	42	58	8	17	3	10	4	10	16	12	3	3	0	0	1	0	4	1-3
1157	SV Werder Bremen-DSC Arminia Bielefeld	2020-10-03	1	4	4	3	0	1	0	0	3	0	1	0	40	60	7	10	2	5	2	1	12	16	2	2	0	0	0	0	6	1-0
1158	VfB Stuttgart-Bayer 04 Leverkusen	2020-10-03	1	4	4	3	9500	0	1	0	1	1	1	1	50	50	11	15	2	7	7	12	8	17	3	2	0	0	0	0	5	1-1
1159	RB Leipzig-FC Schalke 04	2020-10-03	1	4	4	3	8500	1	0	0	3	0	4	0	62	38	21	4	7	1	8	1	13	10	1	3	0	0	0	1	2	4-0
1160	VfL Wolfsburg-FC Augsburg	2020-10-04	1	4	4	3	4632	0	1	0	1	1	0	0	61	39	17	9	6	1	12	2	7	13	0	1	0	0	0	0	5	0-0
1161	FC Bayern München-Hertha Berlin	2020-10-04	1	4	4	3	0	1	0	0	3	0	4	3	62	38	22	9	9	5	6	1	13	19	3	3	0	0	0	1	6	3-3
1162	TSG Hoffenheim-Borussia Dortmund	2020-10-17	1	4	4	4	6030	0	0	1	0	3	0	1	46	54	8	15	3	5	4	6	13	11	1	1	0	0	0	0	4	0-1
1163	Sport-Club Freiburg-SV Werder Bremen	2020-10-17	1	4	4	4	0	0	1	0	1	1	1	1	60	40	19	14	4	4	4	4	10	14	3	3	0	0	1	0	4	1-1
1164	Herta Berlin-VfB Stuttgart	2020-10-17	1	4	4	4	4000	0	0	1	0	3	0	2	62	38	16	7	4	2	6	4	14	10	2	2	0	0	0	0	3	0-2
1165	1. FSV Mainz 05-Bayer 04 Leverkusen	2020-10-17	1	4	4	4	250	0	0	1	0	3	0	1	41	59	5	9	0	4	6	2	12	6	3	1	0	0	0	0	5	0-1
1166	FC Augsburg-RB Leipzig	2020-10-17	1	4	4	4	0	0	0	1	0	3	0	2	37	63	6	15	2	6	5	8	9	13	0	1	0	0	0	0	4	0-2
1167	DSC Arminia Bielefeld-FC Bayern München	2020-10-17	1	4	4	4	0	0	0	1	0	3	1	4	38	62	11	16	5	10	6	10	6	6	1	0	0	1	0	0	2	1-4
1168	B. Mönchengladbach-VfL Wolfsburg	2020-10-17	1	4	4	4	300	0	1	0	1	1	1	1	48	52	13	14	2	5	5	4	14	13	2	2	0	0	0	1	5	1-1
1169	1. FC Köln-Eintracht Frankfurt	2020-10-18	1	4	4	4	300	0	1	0	1	1	1	1	44	56	9	16	5	4	2	8	19	18	3	2	0	0	1	0	4	1-1
1170	FC Schalke 04-1. FC Union Berlin	2020-10-18	1	4	4	4	300	0	1	0	1	1	1	1	54	46	8	13	4	7	5	7	7	13	3	1	0	0	0	0	3	1-1
1171	VfB Stuttgart-1. FC Köln	2020-10-23	1	4	4	5	0	0	1	0	1	1	1	1	57	43	9	14	4	4	3	5	11	13	2	5	0	0	1	0	3	1-1
1172	FC Bayern München-Eintracht Frankfurt	2020-10-24	1	4	4	5	0	1	0	0	3	0	5	0	63	37	20	9	10	3	10	2	11	12	3	0	0	0	0	0	2	5-0
1173	RB Leipzig-Hertha Berlin	2020-10-24	1	4	4	5	999	1	0	0	3	0	2	1	61	39	29	11	7	3	7	3	10	20	1	5	0	1	0	1	6	2-1
1174	1. FC Union Berlin-Sport-Club Freiburg	2020-10-24	1	4	4	5	4500	0	1	0	1	1	1	1	53	47	21	8	7	4	4	2	9	14	1	4	0	0	0	0	5	1-1
1175	1. FSV Mainz 05-B. Mönchengladbach	2020-10-24	1	4	4	5	100	0	0	1	0	3	2	3	42	58	15	21	7	12	3	7	18	11	5	3	0	0	1	0	4	2-3
1176	Borussia Dortmund-FC Schalke 04	2020-10-24	1	4	4	5	300	1	0	0	3	0	3	0	70	30	17	3	7	0	7	2	5	15	0	1	0	0	0	0	0	3-0
1177	VfL Wolfsburg-DSC Arminia Bielefeld	2020-10-25	1	4	4	5	4519	1	0	0	3	0	2	1	49	51	14	8	4	1	4	3	12	10	2	1	0	0	0	0	5	2-1
1178	SV Werder Bremen-TSG Hoffenheim	2020-10-25	1	4	4	5	0	0	1	0	1	1	1	1	51	49	5	15	2	5	1	4	10	20	2	2	0	0	0	0	3	1-1
1179	Bayer 04 Leverkusen-FC Augsburg	2020-10-26	1	4	4	5	0	1	0	0	3	0	3	1	64	36	15	7	7	3	3	3	14	8	1	2	0	0	0	1	4	2-1
1180	FC Schalke 04-VfB Stuttgart	2020-10-30	1	4	4	6	0	0	1	0	1	1	1	1	49	51	9	19	2	5	3	4	11	14	2	2	0	0	1	0	4	1-1
1181	Eintracht Frankfurt-SV Werder Bremen	2020-10-31	1	4	4	6	0	0	1	0	1	1	1	1	66	34	14	9	5	4	5	3	12	14	1	3	0	0	0	0	5	1-1
1182	1. FC Köln-FC Bayern München	2020-10-31	1	4	4	6	0	0	0	1	0	3	1	2	37	63	9	7	2	5	5	1	12	13	1	2	0	0	1	0	5	1-2
1183	FC Augsburg-1. FSV Mainz 05	2020-10-31	1	4	4	6	0	1	0	0	3	0	3	1	50	50	14	8	7	4	4	1	12	10	5	1	0	0	0	0	5	2-1
1184	DSC Arminia Bielefeld-Borussia Dortmund	2020-10-31	1	4	4	6	0	0	0	1	0	3	0	2	32	68	5	21	2	10	0	12	12	13	1	1	0	0	0	0	4	0-2
1185	B. Mönchengladbach-RB Leipzig	2020-10-31	1	4	4	6	0	1	0	0	3	0	1	0	51	49	5	15	4	3	2	4	13	17	2	4	0	0	0	0	5	1-0
1186	Sport-Club Freiburg-Bayer 04 Leverkusen	2020-11-01	1	4	4	6	0	0	0	1	0	3	2	4	41	59	8	18	5	7	4	6	10	11	2	2	0	0	0	0	4	2-4
1187	Hertha Berlin-VfL Wolfsburg	2020-11-01	1	4	4	6	0	0	1	0	1	1	1	1	50	50	18	11	5	4	8	6	8	15	3	1	0	0	0	0	4	1-1
1188	TSG Hoffenheim-1. FC Union Berlin	2020-11-02	1	4	4	6	0	0	0	1	0	3	1	3	59	41	10	9	5	6	3	6	19	13	1	2	1	0	1	0	5	1-2
1189	SV Werder Bremen-1. FC Köln	2020-11-06	1	4	4	7	0	0	1	0	1	1	1	1	62	38	18	8	4	1	1	3	20	20	2	2	0	0	0	1	4	1-1
1190	RB Leipzig-Sport-Club Freiburg	2020-11-07	1	4	4	7	0	1	0	0	3	0	3	0	56	44	15	8	7	3	3	4	14	14	2	3	0	0	0	1	4	3-0
1191	1. FC Union Berlin-DSC Arminia Bielefeld	2020-11-07	1	4	4	7	0	1	0	0	3	0	5	0	49	51	9	5	8	1	5	1	17	9	0	1	0	0	0	1	1	5-0
1192	1. FSV Mainz 05-FC Schalke 04	2020-11-07	1	4	4	7	0	0	1	0	1	1	2	2	37	63	14	22	7	3	4	9	19	13	1	1	0	0	0	2	5	2-2
1193	FC Augsburg-Hertha Berlin	2020-11-07	1	4	4	7	0	0	0	1	0	3	0	3	46	54	10	12	2	6	2	6	12	10	3	0	0	0	1	0	3	0-3
1194	VfB Stuttgart-Eintracht Frankfurt	2020-11-07	1	4	4	7	0	0	1	0	1	1	2	2	45	55	16	15	5	8	10	8	14	16	2	4	0	0	0	1	4	2-2
1195	Borussia Dortmund-FC Bayern München	2020-11-07	1	4	4	7	0	0	0	1	0	3	2	3	51	49	15	16	5	8	4	3	15	7	2	2	0	0	0	0	7	2-3
1196	VfL Wolfsburg-TSG Hoffenheim	2020-11-08	1	4	4	7	0	1	0	0	3	0	2	1	50	50	14	17	8	5	3	7	15	14	1	3	0	0	0	0	5	2-1
1197	Bayer 04 Leverkusen-B. Mönchengladbach	2020-11-08	1	4	4	7	0	1	0	0	3	0	4	3	60	40	15	15	5	6	6	2	15	12	4	2	0	0	1	0	5	4-2
1198	FC Bayern München-SV Werder Bremen	2020-11-21	1	4	4	8	0	0	1	0	1	1	1	1	68	32	15	9	3	4	7	3	10	10	1	4	0	0	0	0	4	1-1
1199	Borussia Mönchengladbach-FC Augsburg	2020-11-21	1	4	4	8	0	0	1	0	1	1	1	1	54	46	15	10	6	5	2	1	7	12	1	4	0	1	0	0	3	1-1
1200	TSG Hoffenheim-VfB Stuttgart	2020-11-21	1	4	4	8	0	0	1	0	1	1	3	3	44	56	13	20	8	9	3	4	15	18	3	2	0	0	0	1	6	3-2
1201	FC Schalke 04-VfL Wolfsburg	2020-11-21	1	4	4	8	0	0	0	1	0	3	0	2	43	57	13	19	6	8	6	4	12	11	0	1	0	0	0	0	4	0-2
1202	DSC Arminia Bielefeld-Bayer 04 Leverkusen	2020-11-21	1	4	4	8	0	0	0	1	0	3	1	2	37	63	1	10	1	4	0	10	6	10	0	1	0	0	0	0	5	1-2
1203	Eintracht Frankfurt-RB Leipzig	2020-11-21	1	4	4	8	0	0	1	0	1	1	1	1	42	58	8	10	3	3	5	6	18	12	3	2	0	0	0	0	3	1-1
1204	Hertha Berlin-Borussia Dortmund	2020-11-21	1	4	4	8	0	0	0	1	0	3	2	5	44	56	9	15	3	8	4	3	12	17	1	1	0	0	0	1	3	2-5
1205	Sport-Club Freiburg-1. FSV Mainz 05	2020-11-22	1	4	4	8	0	0	0	1	0	3	1	3	67	33	19	22	6	8	9	4	6	12	0	1	0	0	0	0	5	1-3
1206	1. FC Köln-1. FC Union Berlin	2020-11-22	1	4	4	8	0	0	0	1	0	3	1	2	50	50	10	10	4	3	5	4	12	15	1	2	0	0	1	0	4	1-2
1207	VfL Wolfsburg-SV Werder Bremen	2020-11-27	1	4	4	9	0	1	0	0	3	0	5	3	59	41	12	5	6	4	0	5	12	12	2	3	0	1	0	0	6	4-3
1208	Borussia Dortmund-1. FC Köln	2020-11-28	1	4	4	9	0	0	0	1	0	3	1	2	66	34	14	7	4	5	6	2	11	11	1	2	0	0	0	0	5	1-2
1209	RB Leipzig-DSC Arminia Bielefeld	2020-11-28	1	4	4	9	0	1	0	0	3	0	2	1	55	45	15	13	7	3	6	7	13	15	2	2	0	0	0	1	4	2-1
1210	1. FC Union Berlin-Eintracht Frankfurt	2020-11-28	1	4	4	9	0	0	1	0	1	1	3	3	44	56	15	13	7	5	4	5	12	16	2	3	0	0	0	1	4	3-3
1211	FC Augsburg-Sport-Club Freiburg	2020-11-28	1	4	4	9	0	0	1	0	1	1	1	1	59	41	10	10	2	5	4	1	15	8	3	1	0	0	0	0	3	1-1
1212	VfB Stuttgart-FC Bayern München	2020-11-28	1	4	4	9	0	0	0	1	0	3	1	3	47	53	14	13	5	6	4	3	11	13	0	0	0	0	0	0	3	1-3
1213	B. Mönchengladbach-FC Schalke 04	2020-11-28	1	4	4	9	0	1	0	0	3	0	4	1	55	45	19	13	9	2	5	4	8	14	2	3	0	0	0	0	1	4-1
1214	Bayer 04 Leverkusen-Hertha Berlin	2020-11-29	1	4	4	9	0	0	1	0	1	1	0	0	56	44	14	5	2	3	6	1	16	19	2	1	0	0	0	0	5	0-0
1215	1. FSV Mainz 05-TSG Hoffenheim	2020-11-29	1	4	4	9	0	0	1	0	1	1	1	1	40	60	10	9	4	5	11	5	16	10	0	0	0	1	0	0	5	1-1
1216	Hertha Berlin-1. FC Union Berlin	2020-12-04	1	4	4	10	0	1	0	0	3	0	3	1	70	30	10	4	7	1	9	2	15	9	1	3	0	1	0	0	6	3-1
1217	Sport-Club Freiburg-B. Mönchengladbach	2020-12-05	1	4	4	10	0	0	1	0	1	1	2	2	43	57	22	11	7	4	5	5	12	19	1	2	0	0	0	1	4	2-2
1218	Eintracht Frankfurt-Borussia Dortmund	2020-12-05	1	4	4	10	0	0	1	0	1	1	1	1	44	56	9	16	1	5	6	5	14	6	6	1	0	0	0	0	3	1-1
1219	1. FC Köln-VfL Wolfsburg	2020-12-05	1	4	4	10	0	0	1	0	1	1	2	2	40	60	6	16	3	6	3	8	12	11	0	1	0	0	0	0	3	2-2
1220	DSC Arminia Bielefeld-1. FSV Mainz 05	2020-12-05	1	4	4	10	0	1	0	0	3	0	2	1	49	51	11	15	5	5	2	3	16	18	3	2	0	0	0	0	5	2-1
1221	FC Bayern München-RB Leipzig	2020-12-05	1	4	4	10	0	0	1	0	1	1	3	3	60	40	10	8	6	4	10	2	5	8	0	1	0	0	0	0	3	3-3
1222	SV Werder Bremen-VfB Stuttgart	2020-12-06	1	4	4	10	0	0	0	1	0	3	1	2	51	49	14	11	4	7	2	4	10	15	4	4	0	0	1	0	5	0-1
1223	FC Schalke 04-Bayer 04 Leverkusen	2020-12-06	1	4	4	10	0	0	0	1	0	3	0	3	37	63	13	24	4	9	2	8	17	11	2	3	0	0	0	1	3	0-3
1224	TSG Hoffenheim-FC Augsburg	2020-12-07	1	4	4	10	0	1	0	0	3	0	3	1	60	40	10	13	7	3	4	3	15	9	0	1	0	0	0	0	3	3-1
1225	VfL Wolfsburg-Eintracht Frankfurt	2020-12-11	1	4	4	11	0	1	0	0	3	0	2	1	53	47	16	7	8	4	8	1	10	12	5	2	0	0	1	1	5	2-1
1226	Borussia Dortmund-VfB Stuttgart	2020-12-12	1	4	4	11	0	0	0	1	0	3	1	5	66	34	12	18	4	10	8	2	11	13	2	3	0	0	1	0	4	1-4
1227	RB Leipzig-SV Werder Bremen	2020-12-12	1	4	4	11	0	1	0	0	3	0	2	0	54	46	15	7	7	2	1	6	17	12	3	1	0	0	0	1	4	2-0
1228	B. Mönchengladbach-Hertha Berlin	2020-12-12	1	4	4	11	0	0	1	0	1	1	1	1	54	46	17	9	4	3	13	2	9	18	3	2	0	0	0	0	4	1-1
1229	Sport-Club Freiburg-DSC Arminia Bielefeld	2020-12-12	1	4	4	11	0	1	0	0	3	0	2	0	50	50	16	5	7	1	5	4	16	13	3	0	0	0	0	1	4	1-0
1230	1. FSV Mainz 05-1. FC Köln	2020-12-12	1	4	4	11	0	0	0	1	0	3	0	1	58	42	15	9	4	6	5	3	15	11	4	4	0	1	0	0	6	0-1
1231	1. FC Union Berlin-FC Bayern München	2020-12-12	1	4	4	11	0	0	1	0	1	1	1	1	38	62	13	15	6	5	4	7	17	8	3	2	0	0	0	0	5	1-1
1232	FC Augsburg-FC Schalke 04	2020-12-13	1	4	4	11	0	0	1	0	1	1	2	2	40	60	8	15	4	4	2	3	17	13	3	4	1	0	0	0	8	1-2
1233	Bayer 04 Leverkusen-TSG Hoffenheim	2020-12-13	1	4	4	11	0	1	0	0	3	0	4	1	59	41	13	11	8	4	6	5	12	13	3	6	0	2	0	1	2	3-1
1234	Eintracht Frankfurt-B. Mönchengladbach	2020-12-15	1	4	4	12	0	0	1	0	1	1	3	3	43	57	11	8	4	4	4	5	18	15	6	4	1	0	1	1	7	3-2
1235	Hertha Berlin-1. FSV Mainz 05	2020-12-15	1	4	4	12	0	0	1	0	1	1	0	0	63	37	9	5	0	0	5	4	17	11	3	1	0	0	0	0	6	0-0
1236	SV Werder Bremen-Borussia Dortmund	2020-12-15	1	4	4	12	0	0	0	1	0	3	1	2	48	52	6	15	3	9	4	4	10	13	3	2	0	0	1	0	5	1-2
1237	VfB Stuttgart-1. FC Union Berlin	2020-12-15	1	4	4	12	0	0	1	0	1	1	2	2	60	40	13	15	6	6	2	3	15	14	3	3	0	0	0	0	7	2-2
1238	FC Schalke 04-Sport-Club Freiburg	2020-12-16	1	4	4	12	0	0	0	1	0	3	0	2	52	48	10	12	2	5	2	3	15	9	2	1	0	0	0	0	4	0-2
1239	FC Bayern München-VfL Wolfsburg	2020-12-16	1	4	4	12	0	1	0	0	3	0	2	1	58	42	11	17	2	7	7	7	14	16	3	1	0	0	0	0	5	2-1
1240	TSG Hoffenheim-RB Leipzig	2020-12-16	1	4	4	12	0	0	0	1	0	3	0	1	46	54	7	4	4	3	5	5	16	14	2	0	0	0	0	0	6	0-1
1241	1. FC Köln-Bayer 04 Leverkusen	2020-12-16	1	4	4	12	0	0	0	1	0	3	0	4	38	62	7	14	0	7	2	6	12	13	1	1	0	0	0	0	0	0-4
1242	DSC Arminia Bielefeld-FC Augsburg	2020-12-16	1	4	4	12	0	0	0	1	0	3	0	1	52	48	12	8	2	2	1	3	14	15	1	2	0	0	0	0	4	0-1
1243	FC Union Berlin-Borussia Dortmund	2020-12-18	1	4	4	13	0	1	0	0	3	0	2	1	34	66	12	15	5	4	8	6	9	7	1	1	0	0	0	0	4	2-1
1244	RB Leipzig- FC Köln	2020-12-19	1	4	4	13	0	0	1	0	1	1	0	0	59	41	14	4	6	1	8	2	11	8	1	0	0	0	0	0	4	0-0
1245	B. Mönchengladbach-TSG Hoffenheim	2020-12-19	1	4	4	13	0	0	0	1	0	3	1	2	48	52	15	14	5	5	3	3	13	22	1	3	1	0	0	1	4	1-2
1246	FC Schalke 04-DSC Arminia Bielefeld	2020-12-19	1	4	4	13	0	0	0	1	0	3	0	1	48	52	11	8	5	3	1	6	17	19	6	5	0	0	0	0	6	0-1
1247	FSV Mainz 05-SV Werder Bremen	2020-12-19	1	4	4	13	0	0	0	1	0	3	0	1	46	54	9	13	1	7	2	5	15	11	2	2	0	0	0	0	6	0-1
1248	FC Augsburg-Eintracht Frankfurt	2020-12-19	1	4	4	13	0	0	0	1	0	3	0	2	47	53	15	15	4	6	2	4	9	10	1	4	0	0	0	0	5	0-2
1249	Bayer 04 Leverkusen-FC Bayern München	2020-12-19	1	4	4	13	0	0	0	1	0	3	1	2	52	48	8	14	3	3	5	7	13	6	1	1	0	0	0	0	4	1-1
1250	Sport-Club Freiburg-Hertha Berlin	2020-12-20	1	4	4	13	0	1	0	0	3	0	4	1	42	58	17	10	9	3	7	3	9	16	0	0	0	0	0	1	4	3-1
1251	VfL Wolfsburg-VfB Stuttgart	2020-12-20	1	4	4	13	0	1	0	0	3	0	1	0	50	50	13	9	4	1	4	6	15	7	2	3	0	0	0	0	4	1-0
1252	Eintracht Frankfurt-Bayer 04 Leverkusen	2021-01-02	1	4	4	14	0	1	0	0	3	0	2	1	36	64	10	10	4	2	2	7	9	6	0	0	0	0	0	0	4	2-1
1253	FC Köln-FC Augsburg	2021-01-02	1	4	4	14	0	0	0	1	0	3	0	1	47	53	12	11	2	4	8	3	20	12	2	3	0	0	0	0	4	0-1
1254	SV Werder Bremen-FC Union Berlin	2021-01-02	1	4	4	14	0	0	0	1	0	3	0	2	56	44	10	9	2	2	6	5	15	14	2	4	0	0	0	0	3	0-2
1255	DSC Arminia Bielefeld-B. Mönchengladbach	2021-01-02	1	4	4	14	0	0	0	1	0	3	0	1	45	55	7	22	0	7	3	14	8	7	2	1	0	0	0	0	5	0-1
1256	TSG Hoffenheim-Sport-Club Freiburg	2021-01-02	1	4	4	14	0	0	0	1	0	3	1	3	71	29	13	7	6	4	8	3	14	22	2	2	0	0	1	0	5	1-3
1257	Hertha Berlin-FC Schalke 04	2021-01-02	1	4	4	14	0	1	0	0	3	0	3	0	62	38	20	10	10	4	9	5	11	18	2	2	0	0	0	0	1	3-0
1258	VfB Stuttgart-RB Leipzig	2021-01-02	1	4	4	14	0	0	0	1	0	3	0	1	46	54	10	22	1	9	3	6	10	10	2	1	0	0	1	0	5	0-1
1259	Borussia Dortmund-VfL Wolfsburg	2021-01-03	1	4	4	14	0	1	0	0	3	0	2	0	56	44	14	22	7	5	10	5	9	12	3	1	0	0	0	0	4	1-0
1260	FC Bayern München-FSV Mainz 05	2021-01-03	1	4	4	14	0	1	0	0	3	0	5	2	68	32	19	12	12	7	10	2	11	9	2	1	0	0	0	1	2	5-2
1261	B. Mönchengladbach-FC Bayern München	2021-01-08	1	4	4	15	0	1	0	0	3	0	3	2	35	65	8	15	4	4	3	8	9	11	1	1	0	0	1	0	5	3-2
1262	FC Union Berlin-VfL Wolfsburg	2021-01-09	1	4	4	15	0	0	1	0	1	1	2	2	46	54	13	11	6	5	5	3	16	13	3	1	0	1	1	0	5	2-2
1263	FSV Mainz 05-Eintracht Frankfurt	2021-01-09	1	4	4	15	0	0	0	1	0	3	0	2	42	58	8	15	0	7	3	7	17	15	2	1	0	0	2	0	4	0-2
1264	FC Schalke 04-TSG Hoffenheim	2021-01-09	1	4	4	15	0	1	0	0	3	0	4	0	44	56	12	18	5	5	5	4	14	13	2	4	0	0	0	0	0	4-0
1265	Bayer 04 Leverkusen-SV Werder Bremen	2021-01-09	1	4	4	15	0	0	1	0	1	1	1	1	68	32	12	3	3	1	3	1	22	13	2	2	0	0	0	0	5	1-1
1266	Sport-Club Freiburg-FC Köln	2021-01-09	1	4	4	15	0	1	0	0	3	0	5	0	50	50	12	5	6	2	1	3	14	10	0	0	0	0	0	0	0	5-0
1267	RB Leipzig-Borussia Dortmund	2021-01-09	1	4	4	15	0	0	0	1	0	3	1	3	53	47	12	15	4	7	3	3	8	12	0	2	0	0	0	0	3	1-3
1268	FC Augsburg-VfB Stuttgart	2021-01-10	1	4	4	15	0	0	0	1	0	3	1	4	48	52	14	27	4	11	4	11	7	12	3	2	1	0	1	0	2	1-4
1269	DSC Arminia Bielefeld-Hertha Berlin	2021-01-10	1	4	4	15	0	1	0	0	3	0	1	0	49	51	12	10	2	6	8	3	8	18	1	1	0	0	0	0	7	1-0
1270	FC Union Berlin-Bayer 04 Leverkusen	2021-01-15	1	4	4	16	0	1	0	0	3	0	1	0	37	63	10	12	2	4	2	3	9	10	1	2	0	0	0	0	5	1-0
1271	SV Werder Bremen-FC Augsburg	2021-01-16	1	4	4	16	0	1	0	0	3	0	2	0	48	52	10	6	5	2	4	4	10	18	0	1	0	0	0	0	4	2-0
1272	FC Köln-Hertha Berlin	2021-01-16	1	4	4	16	0	0	1	0	1	1	0	0	48	52	8	14	2	3	5	4	13	19	2	3	0	0	0	0	4	0-0
1273	VfL Wolfsburg-RB Leipzig	2021-01-16	1	4	4	16	0	0	1	0	1	1	2	2	53	47	8	13	2	9	6	6	16	9	4	3	0	0	0	0	4	2-2
1274	TSG Hoffenheim-DSC Arminia Bielefeld	2021-01-16	1	4	4	16	0	0	1	0	1	1	0	0	60	40	11	8	5	2	5	3	9	21	1	1	0	0	0	0	4	0-0
1275	Borussia Dortmund-FSV Mainz 05	2021-01-16	1	4	4	16	0	0	1	0	1	1	1	1	69	31	18	8	8	3	1	2	10	19	1	2	0	0	0	1	3	1-1
1276	VfB Stuttgart-B. Mönchengladbach	2021-01-16	1	4	4	16	0	0	1	0	1	1	2	2	58	42	19	8	8	5	5	2	11	20	2	3	0	0	1	1	6	1-2
1277	FC Bayern München-Sport-Club Freiburg	2021-01-17	1	4	4	16	0	1	0	0	3	0	2	1	60	40	25	8	9	3	14	3	4	14	1	2	0	0	0	0	5	2-1
1278	Eintracht Frankfurt-FC Schalke 04	2021-01-17	1	4	4	16	0	1	0	0	3	0	3	1	64	36	20	5	11	1	8	2	8	10	0	1	0	0	0	0	4	2-1
1279	B. Mönchengladbach-SV Werder Bremen	2021-01-19	1	4	4	17	0	1	0	0	3	0	1	0	56	44	11	11	6	2	7	5	15	11	2	2	0	0	0	0	5	1-0
1280	Bayer 04 Leverkusen-Borussia Dortmund	2021-01-19	1	4	4	17	0	1	0	0	3	0	2	1	48	52	23	16	13	3	6	5	13	8	2	2	0	0	0	0	5	2-1
1281	Hertha Berlin-TSG Hoffenheim	2021-01-19	1	4	4	17	0	0	0	1	0	3	0	3	57	43	13	11	2	6	3	2	16	16	1	1	0	0	0	1	2	0-3
1282	FSV Mainz 05-VfL Wolfsburg	2021-01-19	1	4	4	17	0	0	0	1	0	3	0	2	38	62	8	8	0	2	2	5	17	15	1	2	0	0	0	0	3	0-2
1283	FC Schalke 04-FC Köln	2021-01-20	1	4	4	17	0	0	0	1	0	3	1	2	61	39	15	12	8	4	5	8	7	11	2	1	0	0	0	0	6	1-1
1284	RB Leipzig-FC Union Berlin	2021-01-20	1	4	4	17	0	1	0	0	3	0	1	0	64	36	15	4	5	1	5	1	6	11	1	1	0	0	0	0	4	1-0
1285	Sport-Club Freiburg-Eintracht Frankfurt	2021-01-20	1	4	4	17	0	0	1	0	1	1	2	2	42	58	11	17	4	4	4	5	10	15	3	3	0	0	0	0	5	2-2
1286	FC Augsburg-FC Bayern München	2021-01-20	1	4	4	17	0	0	0	1	0	3	0	1	40	60	9	17	0	4	5	7	15	11	2	0	0	0	1	1	5	0-1
1287	DSC Arminia Bielefeld-VfB Stuttgart	2021-01-20	1	4	4	17	0	1	0	0	3	0	3	0	39	61	9	11	3	3	2	6	9	9	1	0	0	0	0	0	1	3-0
1288	B. Mönchengladbach-Borussia Dortmund	2021-01-22	1	4	4	18	0	1	0	0	3	0	4	2	41	59	10	17	7	7	3	7	9	9	1	0	0	0	0	0	5	4-2
1289	Bayer 04 Leverkusen-VfL Wolfsburg	2021-01-23	1	4	4	18	0	0	0	1	0	3	0	1	60	40	10	8	4	4	6	2	13	7	1	1	0	0	0	0	5	0-1
1290	Sport-Club Freiburg-VfB Stuttgart	2021-01-23	1	4	4	18	0	1	0	0	3	0	2	1	42	58	9	27	5	11	3	5	20	11	2	0	0	0	1	0	5	2-1
1291	FSV Mainz 05-RB Leipzig	2021-01-23	1	4	4	18	0	1	0	0	3	0	3	2	39	61	10	12	4	5	3	9	13	16	2	4	0	0	0	0	6	3-2
1292	FC Augsburg-FC Union Berlin	2021-01-23	1	4	4	18	0	1	0	0	3	0	2	1	42	58	8	9	4	5	2	3	13	21	3	1	0	0	1	0	5	2-1
1293	DSC Arminia Bielefeld-Eintracht Frankfurt	2021-01-23	1	4	4	18	0	0	0	1	0	3	1	5	45	55	8	15	4	8	0	8	14	22	2	2	0	0	0	0	1	1-5
1294	Hertha Berlin-Werder Bremen	2021-01-23	1	4	4	18	0	0	0	1	0	3	1	4	62	38	18	7	10	5	7	1	16	12	2	3	0	0	0	1	3	1-4
1295	FC Schalke 04-FC Bayern München	2021-01-24	1	4	4	18	0	0	0	1	0	3	0	4	42	58	14	32	4	14	3	7	5	9	1	1	0	0	0	0	0	0-4
1296	TSG Hoffenheim-FC Köln	2021-01-24	1	4	4	18	0	1	0	0	3	0	3	0	53	47	13	13	4	4	6	9	8	13	2	3	0	0	1	2	0	3-0
1297	VfB Stuttgart-FSV Mainz 05	2021-01-29	1	4	4	19	0	1	0	0	3	0	2	0	53	47	9	10	3	2	2	4	9	20	1	4	0	0	0	0	4	2-0
1298	Werder Bremen-FC Schalke 04	2021-01-30	1	4	4	19	0	0	1	0	1	1	1	1	45	55	15	6	6	1	6	1	11	20	0	4	0	0	0	0	6	1-1
1299	FC Bayern München-TSG Hoffenheim	2021-01-30	1	4	4	19	0	1	0	0	3	0	4	1	60	40	15	14	9	5	10	4	10	8	1	0	0	0	0	0	1	4-1
1300	Borussia Dortmund-FC Augsburg	2021-01-30	1	4	4	19	0	1	0	0	3	0	3	1	63	37	14	5	5	1	10	1	12	11	0	1	0	0	0	1	3	3-1
1301	Eintracht Frankfurt-Hertha Berlin	2021-01-30	1	4	4	19	0	1	0	0	3	0	3	1	59	41	16	11	7	4	4	7	17	14	1	4	0	0	0	1	5	2-1
1302	FC Union Berlin-B. Mönchengladbach	2021-01-30	1	4	4	19	0	0	1	0	1	1	1	1	43	57	13	12	3	4	2	9	12	13	1	3	0	0	0	0	7	1-1
1303	RB Leipzig-Bayer 04 Leverkusen	2021-01-30	1	4	4	19	0	1	0	0	3	0	1	0	45	55	16	8	2	4	6	6	11	15	2	2	0	0	0	0	5	1-0
1304	FC Köln-DSC Arminia Bielefeld	2021-01-31	1	4	4	19	0	1	0	0	3	0	3	1	46	54	14	9	7	3	3	5	15	17	2	1	0	0	0	0	6	3-1
1305	VfL Wolfsburg-Sport-Club Freiburg	2021-01-31	1	4	4	19	0	1	0	0	3	0	3	0	47	53	12	9	6	2	5	10	13	10	0	0	0	0	0	0	0	3-0
1306	Hertha Berlin-FC Bayern München	2021-02-05	1	4	4	20	0	0	0	1	0	3	0	1	41	59	11	17	7	7	3	11	12	15	2	1	0	0	1	0	4	0-1
1307	FC Augsburg-VfL Wolfsburg	2021-02-06	1	4	4	20	0	0	0	1	0	3	0	2	43	57	9	17	1	9	7	4	10	15	2	0	0	0	0	0	4	0-2
1308	FSV Mainz 05-Union Berlin	2021-02-06	1	4	4	20	0	1	0	0	3	0	1	0	45	55	9	10	5	3	3	1	12	11	2	5	0	1	0	1	3	1-0
1309	FC Schalke 04-RB Leipzig	2021-02-06	1	4	4	20	0	0	0	1	0	3	0	3	38	62	3	24	1	10	1	7	14	16	2	1	0	0	0	0	1	0-3
1310	Bayer 04 Leverkusen-VfB Stuttgart	2021-02-06	1	4	4	20	0	1	0	0	3	0	5	2	56	44	25	14	11	7	4	4	12	9	0	0	0	0	0	0	4	5-2
1311	Sport-Club Freiburg-Borussia Dortmund	2021-02-06	1	4	4	20	0	1	0	0	3	0	2	1	37	63	6	16	3	5	1	1	12	12	1	2	0	0	0	0	4	2-1
1312	B. Mönchengladbach-FC Köln	2021-02-06	1	4	4	20	0	0	0	1	0	3	1	2	60	40	10	7	2	3	4	1	17	11	4	2	0	0	0	0	6	1-2
1313	TSG Hoffenheim-Eintracht Frankfurt	2021-02-07	1	4	4	20	0	0	0	1	0	3	1	3	55	45	8	9	2	5	4	7	15	12	0	3	0	0	0	0	4	1-3
1314	RB Leipzig-FC Augsburg	2021-02-12	1	4	4	21	0	1	0	0	3	0	2	1	58	42	16	4	6	2	3	4	23	15	3	5	0	0	1	1	4	2-1
1315	Borussia Dortmund-TSG Hoffenheim	2021-02-13	1	4	4	21	0	0	1	0	1	1	2	2	53	47	7	13	4	6	1	7	21	16	3	7	0	0	0	0	5	2-2
1316	Bayer 04 Leverkusen-FSV Mainz 05	2021-02-13	1	4	4	21	0	0	1	0	1	1	2	2	66	34	11	20	5	5	2	2	13	17	5	1	0	0	0	0	5	2-1
1317	Werder Bremen-Sport-Club Freiburg	2021-02-13	1	4	4	21	0	0	1	0	1	1	0	0	45	55	12	8	4	2	4	1	4	20	0	2	0	0	0	0	4	0-0
1318	VfB Stuttgart-Hertha Berlin	2021-02-13	1	4	4	21	0	0	1	0	1	1	1	1	53	47	11	11	3	3	1	5	21	17	2	2	0	0	0	0	4	1-1
1319	Union Berlin-FC Schalke 04	2021-02-13	1	4	4	21	0	0	1	0	1	1	0	0	38	62	19	6	3	1	1	6	14	15	3	2	0	0	0	0	3	0-0
1320	Eintracht Frankfurt-FC Köln	2021-02-14	1	4	4	21	0	1	0	0	3	0	2	0	58	42	17	6	7	1	7	2	14	4	3	1	0	0	0	0	3	2-0
1321	VfL Wolfsburg-B. Mönchengladbach	2021-02-14	1	4	4	21	0	0	1	0	1	1	0	0	55	45	18	12	6	4	9	6	10	11	1	3	0	0	0	0	3	0-0
1322	FC Bayern München-DSC Arminia Bielefeld	2021-02-15	1	4	4	21	0	0	1	0	1	1	3	3	65	35	19	7	11	3	5	2	7	13	1	1	0	0	0	0	3	3-3
1323	DSC Arminia Bielefeld-VfL Wolfsburg	2021-02-19	1	4	4	22	0	0	0	1	0	3	0	3	45	55	7	11	2	6	3	8	10	14	0	2	0	0	0	0	1	0-3
1324	FC Köln-VfB Stuttgart	2021-02-20	1	4	4	22	0	0	0	1	0	3	0	1	50	50	9	9	0	3	0	6	15	10	2	1	0	0	0	0	4	0-1
1325	Sport-Club Freiburg-Union Berlin	2021-02-20	1	4	4	22	0	0	0	1	0	3	0	1	63	37	9	15	1	4	2	4	15	14	2	2	0	0	0	0	6	0-1
1326	Eintracht Frankfurt-FC Bayern München	2021-02-20	1	4	4	22	0	1	0	0	3	0	2	1	43	57	12	22	6	6	6	10	12	7	2	1	0	0	0	0	4	2-1
1327	B. Mönchengladbach-FSV Mainz 05	2021-02-20	1	4	4	22	0	0	0	1	0	3	1	2	64	36	12	8	4	6	4	4	10	16	1	1	0	0	0	0	4	1-2
1328	FC Schalke 04-Borussia Dortmund	2021-02-20	1	4	4	22	0	0	0	1	0	3	0	4	42	58	13	9	2	6	4	2	9	13	2	2	0	0	0	0	0	0-4
1329	FC Augsburg-Bayer 04 Leverkusen	2021-02-21	1	4	4	22	0	0	1	0	1	1	1	1	33	67	6	10	3	3	1	4	16	13	2	4	0	0	0	0	5	1-0
1330	Hertha Berlin-RB Leipzig	2021-02-21	1	4	4	22	0	0	0	1	0	3	0	3	51	49	8	14	4	7	3	4	10	8	1	1	0	0	0	0	0	0-3
1331	TSG Hoffenheim-Werder Bremen	2021-02-21	1	4	4	22	0	1	0	0	3	0	4	0	51	49	12	3	6	1	6	3	16	12	2	2	0	0	0	0	1	4-0
1332	Werder Bremen-Eintracht Frankfurt	2021-02-26	1	4	4	23	0	1	0	0	3	0	2	1	37	63	9	13	5	4	2	8	9	15	4	3	0	0	0	0	6	2-1
1333	FC Bayern München-FC Köln	2021-02-27	1	4	4	23	0	1	0	0	3	0	5	1	54	46	15	6	7	3	4	4	7	9	2	1	0	0	0	0	0	5-1
1334	Borussia Dortmund-DSC Arminia Bielefeld	2021-02-27	1	4	4	23	0	1	0	0	3	0	3	0	61	39	20	8	9	2	5	2	12	16	0	3	0	0	0	1	3	3-0
1335	VfL Wolfsburg-Hertha Berlin	2021-02-27	1	4	4	23	0	1	0	0	3	0	2	0	58	42	11	7	2	2	3	5	15	14	5	0	1	0	0	0	6	2-0
1336	VfB Stuttgart-FC Schalke 04	2021-02-27	1	4	4	23	0	1	0	0	3	0	5	1	48	52	19	11	10	5	11	9	15	18	2	3	0	0	1	0	3	4-1
1337	RB Leipzig-B. Mönchengladbach	2021-02-27	1	4	4	23	0	1	0	0	3	0	3	2	58	42	21	5	11	2	3	4	20	15	2	2	0	0	1	0	7	2-2
1338	Union Berlin-TSG Hoffenheim	2021-02-28	1	4	4	23	0	0	1	0	1	1	1	1	49	51	4	15	1	4	3	4	13	12	0	2	0	0	0	1	5	1-1
1339	FSV Mainz 05-FC Augsburg	2021-02-28	1	4	4	23	0	0	0	1	0	3	0	1	58	42	10	8	5	3	5	3	9	7	1	2	0	0	0	0	4	0-1
1340	Bayer 04 Leverkusen-Sport-Club Freiburg	2021-02-28	1	4	4	23	0	0	0	1	0	3	1	2	65	35	21	6	5	3	8	3	12	11	2	3	0	0	0	0	4	1-2
1341	FC Schalke 04-FSV Mainz 05	2021-03-05	1	4	4	24	0	0	1	0	1	1	0	0	50	50	2	20	2	2	2	6	10	16	2	2	0	0	0	0	6	0-0
1342	Hertha Berlin-FC Augsburg	2021-03-06	1	4	4	24	0	1	0	0	3	0	2	1	66	34	17	7	7	4	6	1	15	13	2	3	0	0	0	1	4	2-1
1343	Eintracht Frankfurt-VfB Stuttgart	2021-03-06	1	4	4	24	0	0	1	0	1	1	1	1	58	42	19	8	8	1	13	4	15	17	2	3	0	0	0	0	5	1-1
1344	Sport-Club Freiburg-RB Leipzig	2021-03-06	1	4	4	24	0	0	0	1	0	3	0	3	46	54	5	13	1	8	1	2	10	13	1	1	0	0	0	0	1	0-3
1345	TSG Hoffenheim-VfL Wolfsburg	2021-03-06	1	4	4	24	0	1	0	0	3	0	2	1	40	60	9	17	4	5	2	6	13	15	2	4	0	1	0	0	6	2-1
1346	B. Mönchengladbach-Bayer 04 Leverkusen	2021-03-06	1	4	4	24	0	0	0	1	0	3	0	1	45	55	7	13	3	5	7	8	6	10	0	2	0	0	0	0	4	0-1
1347	FC Bayern München-Borussia Dortmund	2021-03-06	1	4	4	24	0	1	0	0	3	0	4	2	65	35	25	4	9	3	6	0	8	13	1	1	0	0	0	1	4	4-2
1348	FC Köln-Werder Bremen	2021-03-07	1	4	4	24	0	0	1	0	1	1	1	1	65	35	16	11	4	5	9	3	13	10	2	0	0	0	0	0	3	1-1
1349	DSC Arminia Bielefeld-Union Berlin	2021-03-07	1	4	4	24	0	0	1	0	1	1	0	0	43	57	5	7	3	3	3	3	9	5	0	0	0	0	0	0	4	0-0
1350	DSC Arminia Bielefeld-Werder Bremen	2021-03-10	1	4	4	20 (recovery)	0	0	0	1	0	3	0	2	60	40	22	5	7	2	9	0	12	9	0	2	1	0	0	0	6	0-2
1351	FC Augsburg-B. Mönchengladbach	2021-03-12	1	4	4	25	0	1	0	0	3	0	3	1	47	53	10	28	3	8	1	10	6	10	0	0	0	0	1	0	4	3-1
1352	Werder Bremen-FC Bayern München	2021-03-13	1	4	4	25	0	0	0	1	0	3	1	3	43	57	9	22	4	6	3	8	5	9	1	0	0	0	0	0	4	1-3
1353	FSV Mainz 05-Sport-Club Freiburg	2021-03-13	1	4	4	25	0	1	0	0	3	0	1	0	50	50	10	13	7	3	0	4	24	15	1	3	0	0	0	0	5	1-0
1354	Union Berlin-FC Köln	2021-03-13	1	4	4	25	0	1	0	0	3	0	2	1	41	59	13	9	8	5	6	6	20	13	2	3	0	0	1	1	6	2-1
1355	VfL Wolfsburg-FC Schalke 04	2021-03-13	1	4	4	25	0	1	0	0	3	0	5	0	52	48	16	7	7	1	3	8	12	8	0	1	0	0	0	0	0	5-0
1356	Borussia Dortmund-Hertha Berlin	2021-03-13	1	4	4	25	0	1	0	0	3	0	2	0	68	32	14	4	4	0	7	0	6	11	1	1	0	1	0	0	5	1-0
1357	Bayer 04 Leverkusen-DSC Arminia Bielefeld	2021-03-14	1	4	4	25	0	0	0	1	0	3	1	2	67	33	20	10	8	5	9	5	16	9	2	1	0	0	0	0	7	1-2
1358	RB Leipzig-Eintracht Frankfurt	2021-03-14	1	4	4	25	0	0	1	0	1	1	1	1	54	46	14	5	8	2	4	3	14	21	2	3	0	0	0	0	4	1-1
1359	VfB Stuttgart-TSG Hoffenheim	2021-03-14	1	4	4	25	0	1	0	0	3	0	2	0	45	55	7	16	4	5	4	4	14	9	0	2	0	0	0	0	4	2-0
1360	DSC Arminia Bielefeld-RB Leipzig	2021-03-19	1	4	4	26	0	0	0	1	0	3	0	1	25	75	6	20	0	8	1	7	10	12	2	1	0	0	0	0	3	0-1
1361	FC Bayern München-VfB Stuttgart	2021-03-20	1	4	4	26	0	1	0	0	3	0	4	0	43	57	15	13	7	5	1	3	10	12	1	2	1	0	0	0	0	4-0
1362	Werder Bremen-VfL Wolfsburg	2021-03-20	1	4	4	26	0	0	0	1	0	3	1	2	48	52	11	16	4	5	3	9	16	14	3	1	0	0	0	0	6	1-2
1363	Eintracht Frankfurt-Union Berlin	2021-03-20	1	4	4	26	0	1	0	0	3	0	5	2	55	45	9	25	5	8	2	4	9	10	1	2	0	0	0	0	4	4-2
1364	FC Köln-Borussia Dortmund	2021-03-20	1	4	4	26	0	0	1	0	1	1	2	2	44	56	10	13	2	4	5	2	4	12	1	1	0	0	0	1	5	2-2
1365	FC Schalke 04-B. Mönchengladbach	2021-03-20	1	4	4	26	0	0	0	1	0	3	0	3	34	66	4	21	1	7	2	7	8	8	1	2	0	0	0	0	0	0-3
1366	TSG Hoffenheim-FSV Mainz 05	2021-03-21	1	4	4	26	0	0	0	1	0	3	1	2	62	38	8	16	2	7	2	9	14	12	0	0	0	0	0	0	4	1-2
1367	Hertha Berlin-Bayer 04 Leverkusen	2021-03-21	1	4	4	26	0	1	0	0	3	0	3	0	34	66	13	11	10	1	4	8	10	20	0	2	0	0	0	0	2	3-0
1368	Sport-Club-Freiburg-FC Augsburg	2021-03-21	1	4	4	26	0	1	0	0	3	0	2	0	57	43	10	19	3	8	3	5	21	13	7	2	0	0	0	0	5	2-0
1369	VfL Wolfsburg-FC Köln	2021-04-03	1	4	4	27	0	1	0	0	3	0	1	0	54	46	13	10	6	1	5	4	16	11	2	1	0	0	0	0	7	1-0
1370	FC Augsburg-TSG Hoffenheim	2021-04-03	1	4	4	27	0	1	0	0	3	0	2	1	39	61	7	16	2	6	2	10	7	11	1	1	0	0	0	0	4	2-1
1371	FSV Mainz 05-DSC Arminia Bielefeld	2021-04-03	1	4	4	27	0	0	1	0	1	1	1	1	56	44	12	9	5	2	2	3	27	10	4	1	0	0	0	1	5	1-1
1372	Bayer 04 Leverkusen-FC Schalke 04	2021-04-03	1	4	4	27	0	1	0	0	3	0	2	1	60	40	6	4	2	2	5	4	13	9	1	0	0	0	0	0	3	2-1
1373	Borussia Dortmund-Eintracht Frankfurt	2021-04-03	1	4	4	27	0	0	0	1	0	3	1	2	56	44	20	15	7	3	10	2	9	12	0	3	0	0	0	0	5	1-2
1374	RB Leipzig-FC Bayern München	2021-04-03	1	4	4	27	0	0	0	1	0	3	0	1	52	48	13	9	3	5	8	4	13	9	3	2	0	0	0	0	4	0-1
1375	B. Mönchengladbach-Sport-Club Freiburg	2021-04-03	1	4	4	27	0	1	0	0	3	0	2	1	48	52	19	7	5	4	0	3	11	14	1	3	0	0	0	0	7	2-1
1376	VfB Stuttgart-Werder Bremen	2021-04-04	1	4	4	27	0	1	0	0	3	0	1	0	58	42	14	9	3	2	6	0	8	8	1	2	0	0	0	0	4	1-0
1377	Union Berlin-Hertha Berlin	2021-04-04	1	4	4	27	0	0	1	0	1	1	1	1	69	31	11	4	2	1	2	3	13	12	2	4	0	0	1	0	4	1-1
1378	DSC Arminia Bielefeld-Sport-Club Freiburg	2021-04-09	1	4	4	28	0	1	0	0	3	0	1	0	46	54	15	10	4	2	4	2	8	10	3	2	0	0	0	0	5	1-0
1379	Werder Bremen-RB Leipzig	2021-04-10	1	4	4	28	0	0	0	1	0	3	1	4	39	61	11	7	2	4	2	2	13	10	0	0	0	0	0	1	1	1-4
1380	FC Bayern München-Union Berlin	2021-04-10	1	4	4	28	0	0	1	0	1	1	1	1	58	42	14	6	2	2	8	1	10	12	2	0	0	0	0	0	4	1-1
1381	Eintracht Frankfurt-VfL Wolfsburg	2021-04-10	1	4	4	28	0	1	0	0	3	0	4	3	44	56	9	20	5	7	3	7	11	13	3	2	0	0	0	0	6	4-3
1382	Hertha Berlin-B. Mönchengladbach	2021-04-10	1	4	4	28	0	0	1	0	1	1	2	2	57	43	24	7	8	4	11	3	12	17	2	1	0	1	1	0	6	2-2
1383	VfB Stuttgart-Borussia Dortmund	2021-04-10	1	4	4	28	0	0	0	1	0	3	2	3	50	50	13	18	3	7	3	8	13	11	4	2	0	0	0	0	5	2-3
1384	FC Schalke 04-FC Augsburg	2021-04-11	1	4	4	28	0	1	0	0	3	0	1	0	45	55	7	13	2	4	4	6	10	14	0	2	0	0	0	0	4	1-0
1385	FC Köln-FSV Mainz 05	2021-04-11	1	4	4	28	0	0	0	1	0	3	2	3	62	38	22	9	4	6	2	5	14	14	2	1	0	0	0	1	7	2-2
1386	TSG Hoffenheim-Bayer 04 Leverkusen	2021-04-12	1	4	4	28	0	0	1	0	1	1	0	0	51	49	2	7	0	5	1	1	14	12	1	1	0	0	0	0	4	0-0
1387	Borussia Dortmund-Werder Bremen	2021-04-16	1	4	4	29	0	1	0	0	3	0	4	1	65	35	19	10	9	3	7	4	8	14	1	4	0	0	0	1	2	4-1
1388	RB Leipzig-TSG Hoffenheim	2021-04-17	1	4	4	29	0	0	1	0	1	1	0	0	59	41	15	7	2	0	4	1	14	13	0	2	0	0	0	0	8	0-0
1389	B. Mönchengladbach-Eintracht Frankfurt	2021-04-17	1	4	4	29	0	1	0	0	3	0	4	0	41	59	19	15	4	4	7	8	11	10	2	4	0	0	0	0	6	3-0
1390	Bayer 04 Leverkusen-FC Köln	2021-04-17	1	4	4	29	0	1	0	0	3	0	3	0	42	58	8	14	5	2	2	3	12	12	1	1	0	0	0	0	0	3-0
1391	VfL Wolfsburg-FC Bayern München	2021-04-17	1	4	4	29	0	0	0	1	0	3	2	3	48	52	7	14	3	9	6	5	16	8	2	1	0	0	0	0	8	2-3
1392	Sport-Club Freiburg-FC Schalke 04	2021-04-17	1	4	4	29	0	1	0	0	3	0	4	0	56	44	13	4	8	2	3	4	15	12	2	1	0	0	0	1	0	4-0
1393	Union Berlin-VfB Stuttgart	2021-04-17	1	4	4	29	0	1	0	0	3	0	2	1	45	55	9	9	4	2	4	4	15	12	2	3	0	0	0	0	5	2-1
1394	FC Augsburg-DSC Arminia Bielefeld	2021-04-18	1	4	4	29	0	0	1	0	1	1	0	0	50	50	9	8	3	1	7	3	10	9	4	1	0	0	0	0	4	0-0
1395	FC Köln-RB Leipzig	2021-04-20	1	4	4	30	0	1	0	0	3	0	2	1	36	64	5	23	3	6	0	8	9	16	2	3	0	0	0	0	6	2-1
1396	VfB Stuttgart-VfL Wolfsburg	2021-04-20	1	4	4	30	0	0	0	1	0	3	1	3	58	42	11	13	4	4	4	1	12	11	3	0	0	0	0	1	3	0-3
1397	Werder Bremen-FSV Mainz 05	2021-04-20	1	4	4	30	0	0	0	1	0	3	0	1	61	39	19	13	4	5	10	4	7	13	1	2	0	0	0	0	6	0-1
1398	DSC Arminia Bielefeld-FC Schalke 04	2021-04-20	1	4	4	30	0	1	0	0	3	0	1	0	45	55	16	6	5	0	4	2	14	12	3	5	0	1	0	1	5	1-0
1399	FC Bayern München-Bayer 04 Leverkusen	2021-04-21	1	4	4	30	0	1	0	0	3	0	2	0	59	41	25	6	9	3	7	3	6	14	0	0	0	0	0	0	3	2-0
1400	Eintracht Frankfurt-FC Augsburg	2021-04-21	1	4	4	30	0	1	0	0	3	0	2	0	60	40	12	14	4	4	7	5	18	8	3	1	0	0	1	0	4	2-0
1401	Borussia Dortmund-Union Berlin	2021-04-21	1	4	4	30	0	1	0	0	3	0	2	0	51	49	21	5	11	3	4	3	12	10	2	1	0	0	0	1	3	2-0
1402	TSG Hoffenheim-B. Mönchengladbach	2021-04-21	1	4	4	30	0	1	0	0	3	0	3	2	56	44	19	5	6	3	5	4	9	5	3	0	0	0	0	0	5	3-2
1403	RB Leipzig-VfB Stuttgart	2021-04-25	1	4	4	31	0	1	0	0	3	0	2	0	62	38	24	2	11	0	10	1	19	8	2	0	0	1	0	0	2	2-0
1404	B. Mönchengladbach-DSC Arminia Bielefeld	2021-04-25	1	4	4	31	0	1	0	0	3	0	5	0	59	41	20	10	12	5	4	1	11	8	1	1	0	0	0	0	0	5-0
1405	Bayer 04 Leverkusen-Eintracht Frankfurt	2021-04-24	1	4	4	31	0	1	0	0	3	0	3	1	50	50	18	12	10	4	5	6	9	8	1	1	0	0	0	0	4	2-0
1406	Sport-Club-Freiburg-TSG Hoffenheim	2021-04-24	1	4	4	31	0	0	1	0	1	1	1	1	47	53	15	16	7	4	6	5	10	12	1	2	0	0	0	1	6	1-1
1407	Union Berlin-Werder Bremen	2021-04-24	1	4	4	31	0	1	0	0	3	0	3	1	56	44	17	9	6	5	11	2	10	8	0	0	0	0	0	0	4	3-1
1408	FSV Mainz 05-FC Bayern München	2021-04-24	1	4	4	31	0	1	0	0	3	0	2	1	35	65	8	17	4	4	2	3	12	15	3	4	0	0	0	0	5	2-1
1409	FC Augsburg-FC Köln	2021-04-23	1	4	4	31	0	0	0	1	0	3	2	3	51	49	13	14	5	6	6	3	17	13	2	3	0	0	0	0	7	2-3
1410	VfL Wolfsburg-Borussia Dortmund	2021-04-24	1	4	4	31	0	0	0	1	0	3	0	2	53	47	21	8	2	4	10	2	10	12	1	3	0	1	0	0	5	0-2
1411	FSV Mainz 05-Hertha Berlin	2021-05-03	1	4	4	29 (recovery)	0	0	1	0	1	1	1	1	59	41	16	7	9	5	6	4	18	13	2	3	0	0	0	0	3	1-1
1412	Hertha Berlin-Sport-Club Freiburg	2021-05-06	1	4	4	30 (recovery)	0	1	0	0	3	0	3	0	41	59	13	15	6	4	4	6	10	13	4	3	0	0	0	0	4	3-0
1413	Hertha Berlin-DSC Arminia Bielefeld	2021-05-09	1	4	4	32	0	0	1	0	1	1	0	0	62	38	11	12	4	5	4	3	13	9	3	4	0	0	0	0	5	0-0
1414	VfB Stuttgart-FC Augsburg	2021-05-07	1	4	4	32	0	1	0	0	3	0	2	1	58	42	14	20	6	9	2	12	14	12	0	0	0	0	0	0	5	2-1
1415	Werder Bremen-Bayer 04 Leverkusen	2021-05-08	1	4	4	32	0	0	1	0	1	1	0	0	42	58	13	14	2	4	4	6	9	14	3	2	1	0	0	0	5	0-0
1416	FC Köln-Sport-Club Freiburg	2021-05-09	1	4	4	32	0	0	0	1	0	3	1	4	54	46	18	11	2	6	3	2	15	16	2	2	0	0	0	1	7	1-2
1417	Eintracht Frankfurt-FSV Mainz 05	2021-05-09	1	4	4	32	0	0	1	0	1	1	1	1	68	32	14	6	5	3	8	2	10	14	2	0	0	0	0	0	5	1-1
1418	TSG Hoffenheim-FC Schalke 04	2021-05-08	1	4	4	32	0	1	0	0	3	0	4	2	60	40	20	6	12	3	9	3	11	12	1	2	0	0	0	0	3	4-2
1419	Borussia Dortmund-RB Leipzig	2021-05-08	1	4	4	32	0	1	0	0	3	0	3	2	48	52	15	14	4	7	7	7	8	13	1	1	0	0	0	0	4	3-2
1420	FC Bayern München-B. Mönchengladbach	2021-05-08	1	4	4	32	0	1	0	0	3	0	6	0	59	41	22	14	7	2	5	3	3	9	0	2	1	0	0	1	1	6-0
1421	VfL Wolfsburg-Union Berlin	2021-05-08	1	4	4	32	0	1	0	0	3	0	3	0	60	40	17	9	8	1	4	3	9	9	1	0	0	0	0	0	2	3-0
1422	FC Schalke 04-Hertha Berlin	2021-05-12	1	4	4	31 (recovery)	0	0	0	1	0	3	1	2	49	51	12	18	1	6	1	7	9	11	3	5	0	1	0	0	6	1-2
1423	FC Schalke 04-Eintracht Frankfurt	2021-05-15	1	4	4	33	0	1	0	0	3	0	4	3	41	59	11	24	6	9	1	13	9	11	0	2	0	0	0	1	5	4-3
1424	DSC Arminia Bielefeld-TSG Hoffenheim	2021-05-15	1	4	4	33	0	0	1	0	1	1	1	1	41	59	17	7	6	3	10	4	5	8	1	2	0	0	0	0	4	1-1
1425	FC Augsburg-Werder Bremen	2021-05-15	1	4	4	33	0	1	0	0	3	0	2	0	38	62	15	16	7	5	5	5	12	17	3	3	1	1	0	1	4	2-0
1426	FSV Mainz 05-Borussia Dormund	2021-05-16	1	4	4	33	0	0	0	1	0	3	1	3	36	64	9	13	5	4	4	2	9	11	0	0	0	0	0	1	2	0-3
1427	Hertha Berlin-FC Köln	2021-05-15	1	4	4	33	0	0	1	0	1	1	0	0	45	55	1	11	1	3	1	5	11	12	2	2	0	0	0	0	3	0-0
1428	Sport-Club Freiburg-FC Bayern München	2021-05-15	1	4	4	33	0	0	1	0	1	1	2	2	42	58	13	16	4	6	4	8	10	13	1	2	0	0	1	0	3	2-2
1429	Bayer 04 Leverkusen-Union Berlin	2021-05-15	1	4	4	33	0	0	1	0	1	1	1	1	50	50	9	15	4	6	4	5	9	16	2	2	0	0	0	0	4	1-1
1430	B. Mönchengladbach-VfB Stuttgart	2021-05-15	1	4	4	33	0	0	0	1	0	3	1	2	52	48	9	11	4	7	2	1	14	14	2	4	0	0	0	0	4	1-2
1431	RB Leipzig-VfL Wolfsburg	2021-05-16	1	4	4	33	0	0	1	0	1	1	2	2	59	41	14	12	4	4	11	3	13	15	3	3	0	0	0	1	5	2-2
1432	FC Bayern München-FC Augsburg	2021-05-22	1	4	4	34	250	1	0	0	3	0	5	2	67	33	24	8	13	4	10	2	6	9	1	1	0	0	1	0	1	5-2
1433	Borussia Dortmund-Bayer 04 Leverkusen	2021-05-22	1	4	4	34	0	1	0	0	3	0	3	1	54	46	9	16	3	7	3	6	6	8	0	0	0	0	1	0	1	3-1
1434	TSG Hoffenheim-Hertha Berlin	2021-05-22	1	4	4	34	100	1	0	0	3	0	2	1	61	39	21	9	5	5	4	3	8	5	0	0	0	0	0	0	2	1-1
1435	VfL Wolfsburg-FSV Mainz 05	2021-05-22	1	4	4	34	0	0	0	1	0	3	2	3	61	39	16	14	5	8	7	7	12	19	3	3	0	0	0	0	3	2-3
1436	Eintracht Frankfurt-Sport-Club Freiburg	2021-05-22	1	4	4	34	0	1	0	0	3	0	3	1	54	46	18	11	11	6	8	1	7	10	1	0	0	0	0	1	4	2-1
1437	Union Berlin-RB Leipzig	2021-05-22	1	4	4	34	2000	1	0	0	3	0	2	1	40	60	10	18	4	7	7	3	15	10	2	1	0	0	0	0	3	1-1
1438	FC Köln-FC Schalke 04	2021-05-22	1	4	4	34	0	1	0	0	3	0	1	0	59	41	21	7	10	1	8	4	14	12	1	2	0	0	0	0	5	1-0
1439	Werder Bremen-B. Mönchengladbach	2021-05-22	1	4	4	34	100	0	0	1	0	3	2	4	49	51	16	16	8	8	2	5	9	12	1	2	0	0	0	0	4	2-4
1440	VfB Stuttgart-DSC Arminia Bielefeld	2021-05-22	1	4	4	34	0	0	0	1	0	3	0	2	65	35	11	11	0	3	3	6	12	11	1	0	0	0	1	0	2	0-2
1441	Bordeaux-Nantes	2020-08-21	1	5	5	1	4887	0	1	0	1	1	0	0	43	57	5	6	1	1	2	3	10	15	2	3	1	0	0	0	6	0-0
1442	Dijon-Angers	2020-08-22	1	5	5	1	4102	0	0	1	0	3	0	1	54	46	9	12	1	4	3	9	15	8	0	0	0	0	0	0	5	0-1
1443	Lille-Rennes	2020-08-22	1	5	5	1	3975	0	1	0	1	1	1	1	50	50	5	16	1	3	4	2	12	16	0	1	1	1	0	0	5	1-1
1444	Monaco-Reims	2020-08-23	1	5	5	1	2933	0	1	0	1	1	2	2	74	26	22	9	5	3	8	11	8	14	1	3	0	0	0	0	5	2-2
1445	Lorient-Strasbourg	2020-08-23	1	5	5	1	4432	1	0	0	3	0	3	1	52	48	10	7	7	1	6	1	17	10	3	2	0	0	0	1	4	3-1
1446	Nimes-Brest	2020-08-23	1	5	5	1	2026	1	0	0	3	0	4	0	44	56	12	10	5	3	4	4	14	17	2	3	0	1	0	0	2	4-0
1447	Nice-Lens	2020-08-23	1	5	5	1	0	1	0	0	3	0	2	1	57	43	4	17	2	4	1	7	17	18	2	3	0	0	1	0	5	2-1
1448	Lyon-Dijon	2020-08-28	1	5	5	2	3706	1	0	0	3	0	4	1	63	37	27	6	12	2	13	2	12	7	3	3	0	0	0	2	5	4-1
1449	Rennes-Montpellier	2020-08-29	1	5	5	2	4100	1	0	0	3	0	2	1	66	34	16	11	7	3	2	1	18	16	3	2	1	1	0	0	5	2-0
1450	Strasbourg-Nice	2020-08-29	1	5	5	2	4374	0	0	1	0	3	0	2	43	57	6	3	0	2	3	1	14	11	2	6	0	0	1	0	4	0-2
1451	Reims-Lille	2020-08-30	1	5	5	2	3614	0	0	1	0	3	0	1	52	48	4	10	0	3	1	2	20	11	4	1	0	0	0	0	4	0-1
1452	Nantes-Nimes	2020-08-30	1	5	5	2	4069	1	0	0	3	0	2	1	35	65	8	17	5	9	4	8	16	9	3	2	2	0	0	1	7	2-1
1453	Saint-Etienne-Lorient	2020-08-30	1	5	5	2	3050	1	0	0	3	0	2	0	52	48	13	6	5	1	2	5	14	23	2	1	0	0	0	0	4	2-0
1454	Angers-Bordeaux	2020-08-30	1	5	5	2	5129	0	0	1	0	3	0	2	57	43	12	7	2	7	5	7	12	19	1	3	0	0	0	0	5	2-0
1455	Metz-Monaco	2020-08-30	1	5	5	2	4463	0	0	1	0	3	0	1	55	45	14	3	4	2	10	1	14	20	0	5	0	1	0	0	6	0-1
1456	Brest-Marseille	2020-08-30	1	5	5	2	4819	0	0	1	0	3	2	3	58	42	19	7	4	4	10	2	17	13	2	4	0	0	0	0	6	2-3
1457	Lens-Paris SG	2020-09-10	1	5	5	2	5067	1	0	0	3	0	1	0	24	76	7	8	3	1	4	2	21	10	2	2	0	0	0	0	4	1-0
1458	Bordeaux-Lyon	2020-09-11	1	5	5	3	4428	0	1	0	1	1	0	0	44	56	5	20	0	3	4	5	12	19	2	3	0	0	0	0	5	0-0
1459	Montpellier-Nice	2020-09-12	1	5	5	3	3252	1	0	0	3	0	3	1	35	65	20	9	13	1	8	9	17	16	0	2	0	0	0	0	3	3-1
1460	Saint-Etienne-Strasbourg	2020-09-12	1	5	5	3	4300	1	0	0	3	0	2	0	50	50	10	14	4	7	6	3	13	18	1	3	0	0	0	1	6	2.0
1461	Lille-Metz	2020-09-13	1	5	5	3	4162	1	0	0	3	0	1	0	59	41	16	5	6	1	8	3	13	14	4	4	0	0	0	0	6	1-0
1462	Nimes-Rennes	2020-09-13	1	5	5	3	3467	0	0	1	0	3	2	4	46	54	17	10	9	6	8	4	17	13	2	6	0	0	0	0	8	2-3
1463	Lorient-Lens	2020-09-13	1	5	5	3	4968	0	0	1	0	3	2	3	47	53	6	12	3	6	4	2	20	16	4	3	0	1	1	1	5	1-3
1464	Angers-Reims	2020-09-13	1	5	5	3	5348	1	0	0	3	0	1	0	58	42	20	7	7	2	1	2	12	12	4	2	1	1	0	1	5	1-0
1465	Dijon-Brest	2020-09-13	1	5	5	3	4340	0	0	1	0	3	0	2	50	50	7	19	3	5	5	7	16	16	2	0	1	0	0	0	6	0-1
1466	Monaco-Nantes	2020-09-13	1	5	5	3	2864	1	0	0	3	0	2	1	56	44	18	7	5	2	9	4	14	11	3	1	0	0	0	0	5	2-1
1467	Paris SG-Marseille	2020-09-13	1	5	5	3	5000	0	0	1	0	3	0	1	67	33	14	5	4	2	4	2	17	19	6	8	3	2	0	0	10	0-1
1468	Montpellier-Lyon	2020-09-15	1	5	5	1 (recovery)	4114	1	0	0	3	0	2	1	42	58	10	19	3	7	4	11	13	13	3	2	1	1	1	1	6	2-1
1469	Paris SG-Metz	2020-09-16	1	5	5	1 (recovery)	3352	1	0	0	3	0	1	0	71	29	20	7	8	1	8	2	8	6	3	2	1	0	0	0	6	0-0
1470	Marseille-Saint-Etienne	2020-09-17	1	5	5	1 (recovery)	990	0	0	1	0	3	0	2	57	43	13	12	2	5	7	6	13	15	2	2	0	0	0	0	5	0-2
1471	Lyon-Nimes	2020-09-18	1	5	5	4	4385	0	1	0	1	1	0	0	70	30	16	10	3	3	9	2	17	12	3	2	0	0	0	0	7	0-0
1472	Lens-Bordeaux	2020-09-19	1	5	5	4	4871	1	0	0	3	0	2	1	56	44	19	7	5	3	7	0	15	15	5	5	0	1	0	1	6	2-0
1473	Rennes-Monaco	2020-09-19	1	5	5	4	4986	1	0	0	3	0	2	1	59	41	14	14	3	2	9	10	11	12	1	2	0	0	0	0	6	1-1
1474	Nice-Paris SG	2020-09-20	1	5	5	4	0	0	0	1	0	3	0	3	51	49	14	14	5	6	4	7	9	9	0	1	0	0	1	0	3	0-3
1475	Montpellier-Angers	2020-09-20	1	5	5	4	3538	1	0	0	3	0	4	1	49	51	14	14	9	3	6	3	14	5	4	3	0	0	0	0	3	4-1
1476	Brest-Lorient	2020-09-20	1	5	5	4	4553	1	0	0	3	0	3	2	57	43	14	9	6	4	4	6	20	13	2	1	0	0	0	0	5	3-1
1477	Metz-Reims	2020-09-20	1	5	5	4	5000	1	0	0	3	0	2	1	61	39	14	10	4	4	8	5	14	7	1	4	0	1	1	0	4	2-1
1478	Strasbourg-Dijon	2020-09-20	1	5	5	4	4392	1	0	0	3	0	1	0	57	43	17	6	6	2	8	2	10	16	1	1	0	0	0	0	6	1-0
1479	Nantes-Saint-Etienne	2020-09-20	1	5	5	4	5000	0	1	0	1	1	2	2	56	44	15	6	3	4	4	2	12	17	2	2	0	0	0	0	6	2-2
1480	Marseille-Lille	2020-09-20	1	5	5	4	983	0	1	0	1	1	1	1	54	46	11	14	2	7	5	4	12	18	3	3	0	0	0	0	4	1-1
1481	Lille-Nantes	2020-09-25	1	5	5	5	4012	1	0	0	3	0	2	0	55	45	12	12	4	6	4	7	16	12	0	2	0	0	0	1	5	2-0
1482	Saint-Etienne-Rennes	2020-09-26	1	5	5	5	910	0	0	1	0	3	0	3	50	50	6	10	4	6	6	4	11	12	1	1	0	0	0	0	5	0-3
1483	Marseille-Metz	2020-09-26	1	5	5	5	984	0	1	0	1	1	1	1	59	41	17	14	3	3	5	5	15	11	0	2	0	0	0	0	6	0-1
1484	Bordeaux-Nice	2020-09-27	1	5	5	5	0	0	1	0	1	1	0	0	43	57	18	13	5	2	7	7	9	15	1	1	0	0	0	0	4	0-0
1485	Dijon-Montpellier	2020-09-27	1	5	5	5	4398	0	1	0	1	1	2	2	43	57	15	14	6	5	6	13	15	11	4	1	0	0	1	0	4	2-1
1486	Nimes-Lens	2020-09-27	1	5	5	5	3309	0	1	0	1	1	1	1	50	50	13	15	4	5	5	7	10	16	0	3	0	0	0	0	6	1-1
1487	Monaco-Strasbourg	2020-09-27	1	5	5	5	1552	1	0	0	3	0	3	2	55	45	11	11	5	5	6	2	11	12	3	1	2	0	1	0	6	3-2
1488	Angers-Brest	2020-09-27	1	5	5	5	5471	1	0	0	3	0	3	2	53	47	12	14	5	6	6	1	17	21	3	2	0	0	1	0	6	3-2
1489	Lorient-Lyon	2020-09-27	1	5	5	5	4977	0	1	0	1	1	1	1	33	67	4	19	2	6	1	5	19	7	2	0	0	0	0	0	6	1-1
1490	Reims-Paris SG	2020-09-27	1	5	5	5	4988	0	0	1	0	3	0	2	38	62	8	21	3	7	3	7	11	10	2	2	0	0	0	0	5	0-2
1491	Paris SG-Angers	2020-10-02	1	5	5	6	995	1	0	0	3	0	6	1	58	42	18	8	12	2	6	2	11	9	1	2	0	0	0	0	1	6-1
1492	Lens-Saint-Etienne	2020-10-03	1	5	5	6	4945	1	0	0	3	0	2	0	62	38	13	2	5	1	12	0	23	10	1	1	0	2	0	1	2	2-0
1493	Nice-Nantes	2020-10-03	1	5	5	6	1000	1	0	0	3	0	2	1	70	30	18	11	7	1	9	2	13	8	2	1	0	1	1	0	3	2-1
1494	Montpellier-Nimes	2020-10-04	1	5	5	6	0	0	0	1	0	3	0	1	49	51	12	8	2	1	8	2	14	15	2	1	0	0	0	0	5	0-1
1495	Strasbourg-Lille	2020-10-04	1	5	5	6	4988	0	0	1	0	3	0	3	44	56	14	12	3	6	11	1	11	10	1	1	0	0	0	0	3	0-3
1496	Brest-Monaco	2020-10-04	1	5	5	6	5033	1	0	0	3	0	1	0	30	70	7	21	5	2	1	8	10	17	3	4	0	0	0	0	3	1-0
1497	Bordeaux-Dijon	2020-10-04	1	5	5	6	0	1	0	0	3	0	3	0	50	50	17	5	7	1	5	4	15	14	2	3	0	0	0	0	4	3-0
1498	Metz-Lorient	2020-10-04	1	5	5	6	5000	1	0	0	3	0	3	1	60	40	16	10	8	4	4	3	10	15	1	2	0	0	0	1	3	3-1
1499	Rennes-Reims	2020-10-04	1	5	5	6	1000	0	1	0	1	1	2	2	69	31	18	9	3	4	10	2	12	16	4	3	0	0	0	0	4	2-2
1500	Lyon-Marseille	2020-10-04	1	5	5	6	1000	0	1	0	1	1	1	1	66	34	24	3	3	1	19	5	14	9	1	1	0	1	0	1	5	1-1
1501	Dijon-Rennes	2020-10-16	1	5	5	7	1000	0	1	0	1	1	1	1	39	61	5	30	4	3	3	5	22	13	4	2	0	0	0	0	5	1-1
1502	Nimes-Paris SG	2020-10-16	1	5	5	7	3526	0	0	1	0	3	0	4	24	76	5	30	2	11	1	9	10	12	1	2	1	0	0	0	1	0-4
1503	Reims-Lorient	2020-10-17	1	5	5	7	3923	0	0	1	0	3	1	3	47	53	6	14	3	4	3	6	14	11	4	1	2	0	1	0	3	1-3
1504	Marseille-Bordeaux	2020-10-17	1	5	5	7	0	1	0	0	3	0	3	1	56	44	6	8	4	4	6	10	13	13	3	1	0	0	0	1	7	3-1
1505	Strasbourg-Lyon	2020-10-18	1	5	5	7	5000	0	0	1	0	3	2	3	53	47	20	14	9	8	4	2	13	8	2	3	0	0	0	0	4	2-3
1506	Angers-Metz	2020-10-18	1	5	5	7	5000	0	1	0	1	1	1	1	46	54	7	7	2	3	2	5	18	13	4	2	0	0	0	1	4	1-1
1507	Monaco-Montpellier	2020-10-18	1	5	5	7	1100	0	1	0	1	1	1	1	81	19	21	3	7	2	10	2	13	13	2	1	0	1	0	1	6	1-1
1508	Nantes-Brest	2020-10-18	1	5	5	7	1000	1	0	0	3	0	3	1	40	60	12	14	8	5	2	6	15	15	3	2	0	0	0	0	2	3-1
1509	Saint-Etienne-Nice	2020-10-18	1	5	5	7	1000	0	0	1	0	3	1	3	46	54	11	11	4	5	7	3	15	10	2	5	0	0	0	0	5	1-2
1510	Lille-Lens	2020-10-18	1	5	5	7	0	1	0	0	3	0	4	0	57	43	17	7	6	2	7	2	13	16	0	3	0	2	0	0	2	4-0
1511	Rennes-Angers	2020-10-23	1	5	5	8	4038	0	0	1	0	3	1	2	64	36	11	10	1	4	5	4	11	5	2	0	0	0	0	0	3	1-2
1512	Lorient-Marseille	2020-10-24	1	5	5	8	5000	0	0	1	0	3	0	1	35	65	13	15	3	3	6	4	10	12	3	3	0	0	0	0	5	0-1
1513	Paris SG-Dijon	2020-10-24	1	5	5	8	0	1	0	0	3	0	4	0	55	45	20	16	9	3	4	10	12	18	0	2	0	0	0	0	1	4-0
1514	Montpellier-Reims	2020-10-25	1	5	5	8	0	0	0	1	0	3	0	4	32	68	5	24	1	9	3	8	7	11	1	0	2	0	2	0	1	0-4
1515	Metz-Saint-Etienne	2020-10-25	1	5	5	8	5000	1	0	0	3	0	2	0	42	58	6	10	3	0	5	3	11	18	3	3	0	0	0	0	4	2-0
1516	Bordeaux-Nimes	2020-10-25	1	5	5	8	0	1	0	0	3	0	2	0	59	41	20	8	6	4	7	4	9	16	3	3	0	0	0	1	4	2-0
1517	Brest-Strasbourg	2020-10-25	1	5	5	8	4361	0	0	1	0	3	0	3	63	37	14	7	4	5	12	2	8	11	1	3	0	0	1	0	5	0-3
1518	Nice-Lille	2020-10-25	1	5	5	8	1000	0	1	0	1	1	1	1	53	47	8	12	3	4	5	3	13	18	1	6	0	0	0	0	4	1-1
1519	Lyon-Monaco	2020-10-25	1	5	5	8	0	1	0	0	3	0	4	1	34	66	15	18	6	5	2	12	12	15	2	3	1	0	1	1	4	4-1
1520	Rennes-Brest	2020-10-31	1	5	5	9	0	1	0	0	3	0	2	1	69	31	24	9	8	4	8	1	2	12	1	3	0	0	0	0	3	2-1
1521	Nantes-Paris SG	2020-10-31	1	5	5	9	0	0	0	1	0	3	0	3	37	63	6	13	1	4	2	4	12	13	2	1	0	0	1	1	3	0-3
1522	Saint-Etienne-Montpellier	2020-11-01	1	5	5	9	0	0	0	1	0	3	0	1	55	45	8	10	0	2	8	2	16	17	3	3	0	0	0	0	5	0-1
1523	Angers-Nice	2020-11-01	1	5	5	9	0	0	0	1	0	3	0	3	52	48	11	12	5	5	9	5	18	12	5	2	0	0	1	0	8	0-3
1524	Nimes-Metz	2020-11-01	1	5	5	9	0	0	0	1	0	3	0	1	67	33	16	8	2	5	10	1	13	15	3	2	0	1	0	0	6	0-1
1525	Dijon-Lorient	2020-11-01	1	5	5	9	0	0	1	0	1	1	0	0	53	47	11	9	2	1	9	7	18	13	2	1	0	0	1	0	4	0-0
1526	Reims-Strasbourg	2020-11-01	1	5	5	9	0	1	0	0	3	0	2	1	52	48	12	9	4	3	5	3	13	13	0	2	0	0	1	0	5	2-1
1527	Monaco-Bordeaux	2020-11-01	1	5	5	9	0	1	0	0	3	0	4	0	52	48	17	5	6	0	10	4	10	12	2	2	0	0	0	0	1	4-0
1528	Lille-Lyon	2020-11-01	1	5	5	9	0	0	1	0	1	1	1	1	60	40	15	8	6	1	9	4	14	10	3	3	0	1	0	0	5	1-1
1529	Strasbourg-Marseille	2020-11-06	1	5	5	10	0	0	0	1	0	3	0	1	52	48	9	1	2	1	2	2	13	17	0	4	0	0	0	0	4	0-1
1530	Bordeaux-Montpellier	2020-11-07	1	5	5	10	0	0	0	1	0	3	0	2	52	48	9	9	1	3	3	5	14	10	2	1	0	0	0	0	3	0-2
1531	Paris SG-Rennes	2020-11-07	1	5	5	10	0	1	0	0	3	0	3	0	49	51	9	16	6	3	2	7	19	15	3	0	0	0	0	0	3	3-0
1532	Brest-Lille	2020-11-08	1	5	5	10	0	1	0	0	3	0	3	2	37	63	12	22	8	7	3	11	13	15	3	3	0	0	1	0	5	3-2
1533	Metz-Dijon	2020-11-08	1	5	5	10	0	0	1	0	1	1	1	1	45	55	14	14	4	6	5	6	16	11	2	1	0	0	1	1	3	1-1
1534	Lens-Reims	2020-11-08	1	5	5	10	0	0	1	0	1	1	4	4	63	37	14	8	5	6	9	1	12	7	3	1	0	0	0	0	7	3-4
1535	Nimes-Angers	2020-11-08	1	5	5	10	0	0	0	1	0	3	1	5	61	39	11	15	4	8	6	2	12	15	2	5	0	0	1	0	8	0-4
1536	Lorient-Nantes	2020-11-08	1	5	5	10	0	0	0	1	0	3	0	2	47	53	18	16	4	4	5	5	17	9	3	1	0	0	0	0	3	0-2
1537	Nice-Monaco	2020-11-08	1	5	5	10	0	0	0	1	0	3	1	2	62	38	8	15	4	8	1	4	8	16	2	2	0	0	0	0	5	1-2
1538	Lyon-Saint-Etienne	2020-11-08	1	5	5	10	0	1	0	0	3	0	2	1	60	40	18	16	6	4	3	5	19	19	5	3	0	0	1	0	8	2-1
1539	Rennes-Bordeaux	2020-11-20	1	5	5	11	0	0	0	1	0	3	0	1	58	42	14	6	2	3	7	3	18	19	2	2	0	0	0	0	6	0-1
1540	Monaco-Paris SG	2020-11-20	1	5	5	11	0	1	0	0	3	0	3	2	52	48	15	9	5	4	2	1	12	19	2	3	0	1	1	1	6	3-2
1541	Brest-Saint-Etienne	2020-11-21	1	5	5	11	0	1	0	0	3	0	4	1	41	59	10	17	5	1	5	6	12	10	1	1	0	0	0	0	2	4-1
1542	Nantes-Metz	2020-11-22	1	5	5	11	0	0	1	0	1	1	1	1	67	33	17	10	5	4	6	2	18	15	2	3	0	0	1	0	5	1-1
1543	Montpellier-Strasbourg	2020-11-22	1	5	5	11	0	1	0	0	3	0	4	3	57	43	21	9	9	5	11	3	16	11	2	1	0	0	2	0	4	4-3
1544	Dijon-Lens	2020-11-22	1	5	5	11	0	0	0	1	0	3	0	1	53	47	11	8	2	4	8	6	15	7	2	0	0	0	0	0	6	0-1
1545	Reims-Nimes	2020-11-22	1	5	5	11	0	0	0	1	0	3	0	1	71	29	16	6	6	5	7	1	18	11	3	1	0	0	1	0	5	0-1
1546	Angers-Lyon	2020-11-22	1	5	5	11	0	0	0	1	0	3	0	1	51	49	19	5	8	2	8	3	12	12	2	3	0	0	0	0	5	0-1
1547	Lille-Lorient	2020-11-22	1	5	5	11	0	1	0	0	3	0	4	0	64	36	31	7	13	2	9	4	10	11	1	3	0	0	0	0	3	4-0
1548	Lens-Nantes	2020-11-25	1	5	5	8 (recovery)	0	0	1	0	1	1	1	1	49	51	7	11	1	3	6	2	14	18	4	2	0	0	1	0	7	1-1
1549	Strasbourg-Rennes	2020-11-27	1	5	5	12	0	0	1	0	1	1	1	1	31	69	6	21	3	7	2	7	11	12	0	0	1	0	0	0	3	1-1
1550	Marseille-Nantes	2020-11-28	1	5	5	12	0	1	0	0	3	0	3	1	57	43	15	6	9	2	3	7	16	11	4	2	0	0	0	1	6	3-1
1551	Paris SG-Bordeaux	2020-11-28	1	5	5	12	0	0	1	0	1	1	2	2	66	34	16	18	9	4	14	5	8	10	1	1	0	0	0	1	4	2-2
1552	Lyon-Reims	2020-11-29	1	5	5	12	0	1	0	0	3	0	3	0	64	36	15	9	4	2	4	2	19	11	2	1	0	1	0	0	3	3-0
1553	Lens-Angers	2020-11-29	1	5	5	12	0	0	0	1	0	3	1	3	64	36	13	18	5	7	1	7	15	13	2	2	0	0	0	0	4	1-2
1554	Lorient-Montpellier	2020-11-29	1	5	5	12	0	0	0	1	0	3	0	1	42	58	8	16	2	3	2	4	13	14	2	1	0	0	1	0	4	0-1
1555	Metz-Brest	2020-11-29	1	5	5	12	0	0	0	1	0	3	0	2	46	54	15	10	6	3	10	5	11	10	2	1	0	0	0	0	3	0-2
1556	Monaco-Nimes	2020-11-29	1	5	5	12	0	1	0	0	3	0	3	0	68	32	17	6	5	2	8	3	16	9	1	1	0	1	0	0	3	3-0
1557	Nice-Dijon	2020-11-29	1	5	5	12	0	0	0	1	0	3	1	3	61	39	24	9	7	4	11	1	7	20	3	2	0	0	0	1	7	1-3
1558	Saint-Etienne-Lille	2020-11-29	1	5	5	12	0	0	1	0	1	1	1	1	38	62	7	9	5	2	3	3	15	13	4	1	0	0	0	1	6	1-1
1559	Nimes-Marseille	2020-12-04	1	5	5	13	0	0	0	1	0	3	0	2	32	68	7	17	0	4	1	8	11	18	3	4	1	0	0	0	5	0-2
1560	Rennes-Lens	2020-12-05	1	5	5	13	0	0	0	1	0	3	0	2	60	40	10	6	4	4	8	3	18	16	1	3	0	0	0	0	3	0-2
1561	Montpellier-Paris SG	2020-12-05	1	5	5	13	0	0	0	1	0	3	1	3	35	65	17	13	2	6	3	3	12	14	1	3	0	0	0	0	5	1-2
1562	Lille-Monaco	2020-12-06	1	5	5	13	0	1	0	0	3	0	2	1	42	58	10	8	5	3	1	3	12	11	2	0	0	0	0	0	4	2-1
1563	Angers-Lorient	2020-12-06	1	5	5	13	0	1	0	0	3	0	2	0	48	52	10	12	3	3	2	12	13	11	3	0	0	0	0	0	7	1-0
1564	Bordeaux-Brest	2020-12-06	1	5	5	13	0	1	0	0	3	0	1	0	59	41	21	8	6	3	8	2	10	11	0	3	0	0	0	0	4	1-0
1565	Nantes-Strasbourg	2020-12-06	1	5	5	13	0	0	0	1	0	3	0	4	62	38	14	13	2	9	7	3	13	13	3	2	0	0	2	0	2	0-4
1566	Dijon-Saint-Etienne	2020-12-06	1	5	5	13	0	0	1	0	1	1	0	0	41	59	6	7	1	2	7	4	15	13	0	1	0	0	0	0	4	0-0
1567	Reims-Nice	2020-12-06	1	5	5	13	0	0	1	0	1	1	0	0	35	65	11	12	2	4	6	6	12	13	1	2	0	0	0	0	3	0-0
1568	Metz-Lyon	2020-12-06	1	5	5	13	0	0	0	1	0	3	1	3	46	54	12	18	5	5	5	6	14	14	1	1	1	1	0	1	5	1-3
1569	Saint-Etienne-Angers	2020-12-11	1	5	5	14	0	0	1	0	1	1	0	0	62	38	14	8	3	3	5	6	16	15	3	3	0	0	0	0	4	0-0
1570	Marseille-Monaco	2020-12-12	1	5	5	14	0	1	0	0	3	0	2	1	39	61	5	9	2	4	1	3	22	10	3	2	0	0	1	0	6	2-1
1571	Lens-Montpellier	2020-12-12	1	5	5	14	0	0	0	1	0	3	2	3	59	41	14	10	4	7	6	4	11	14	1	1	0	0	0	1	6	2-3
1572	Nice-Rennes	2020-12-13	1	5	5	14	0	0	0	1	0	3	0	1	54	46	11	16	3	6	3	6	16	10	2	1	0	0	0	0	5	0-1
1573	Brest-Reims	2020-12-13	1	5	5	14	0	1	0	0	3	0	2	1	52	48	10	10	6	4	3	4	12	11	1	1	0	0	0	1	5	2-1
1574	Strasbourg-Metz	2020-12-13	1	5	5	14	0	0	1	0	1	1	2	2	57	43	18	6	4	3	5	4	11	16	3	4	0	0	2	0	5	2-2
1575	Nantes-Dijon	2020-12-13	1	5	5	14	0	0	1	0	1	1	1	1	37	63	17	13	6	4	4	4	11	16	2	2	0	0	0	1	5	1-1
1576	Lorient-Nimes	2020-12-13	1	5	5	14	0	1	0	0	3	0	3	0	44	56	13	6	5	2	2	3	18	7	2	0	0	0	0	1	3	3-0
1577	Lille-Bordeaux	2020-12-13	1	5	5	14	0	1	0	0	3	0	2	1	56	44	15	4	5	3	8	3	14	10	0	2	0	0	0	0	3	2-1
1578	Paris SG-Lyon	2020-12-13	1	5	5	14	0	0	0	1	0	3	0	1	65	35	7	9	1	5	5	5	11	17	4	1	0	1	0	0	10	0-1
1579	Dijon-Lille	2020-12-16	1	5	5	15	0	0	0	1	0	3	0	2	47	53	6	10	1	5	5	4	21	8	0	0	0	0	0	0	8	0-1
1580	Montpellier-Metz	2020-12-16	1	5	5	15	0	0	0	1	0	3	0	2	59	41	14	9	3	5	10	2	11	9	3	3	0	0	1	0	4	0-2
1581	Angers-Strasbourg	2020-12-16	1	5	5	15	0	0	0	1	0	3	0	2	56	44	8	7	2	3	6	2	9	11	1	2	0	0	0	0	6	0-1
1582	Nimes-Nice	2020-12-16	1	5	5	15	0	0	0	1	0	3	0	2	44	56	15	14	4	6	4	5	8	10	1	2	0	1	0	0	5	0-1
1583	Reims-Nantes	2020-12-16	1	5	5	15	0	1	0	0	3	0	3	2	46	54	13	18	4	7	3	6	13	13	2	2	0	0	0	1	6	3-2
1584	Lyon-Brest	2020-12-16	1	5	5	15	0	0	1	0	1	1	2	2	56	44	28	8	11	2	12	2	13	5	3	0	0	1	1	1	7	2-1
1585	Paris SG-Lorient	2020-12-16	1	5	5	15	0	1	0	0	3	0	2	0	75	25	24	8	8	3	9	2	19	9	3	0	0	1	0	1	3	2-0
1586	Rennes-Marseille	2020-12-16	1	5	5	15	0	1	0	0	3	0	2	1	67	33	15	8	5	1	9	1	19	15	1	4	0	1	0	0	4	2-1
1587	Monaco-Lens	2020-12-16	1	5	5	15	0	0	0	1	0	3	0	3	32	68	7	8	1	4	3	3	8	17	2	4	1	0	0	0	2	0-3
1588	Bordeaux-Saint-Etienne	2020-12-16	1	5	5	15	0	0	0	1	0	3	1	2	52	48	11	19	3	8	3	4	12	14	3	2	0	0	0	0	4	1-2
1589	Metz-Lens	2020-12-19	1	5	5	16	0	1	0	0	3	0	2	0	39	61	12	17	4	3	8	4	17	8	1	1	0	0	0	0	5	1-0
1590	Marseille-Reims	2020-12-19	1	5	5	16	0	0	1	0	1	1	1	1	71	29	12	2	6	1	7	3	11	10	1	3	0	0	0	0	4	1-1
1591	Nice-Lyon	2020-12-19	1	5	5	16	0	0	0	1	0	3	1	4	55	45	8	13	1	9	8	2	17	9	1	1	0	0	1	0	4	1-4
1592	Brest-Montpellier	2020-12-20	1	5	5	16	0	0	1	0	1	1	1	1	55	45	17	10	7	4	6	4	14	15	2	1	0	0	0	0	4	2-2
1593	Dijon-Monaco	2020-12-20	1	5	5	16	0	0	0	1	0	3	0	1	52	48	11	13	1	6	2	6	13	14	2	1	0	0	0	0	6	0-1
1594	Nantes-Angers	2020-12-20	1	5	5	16	0	0	1	0	1	1	1	1	61	39	9	12	2	6	5	6	16	13	4	0	0	0	0	0	5	1-1
1595	Strasbourg-Bordeaux	2020-12-20	1	5	5	16	0	0	0	1	0	3	0	2	54	46	10	11	3	6	5	3	15	12	2	1	0	0	0	0	6	0-2
1596	Saint-Etienne-Nimes	2020-12-20	1	5	5	16	0	0	1	0	1	1	2	2	59	41	18	9	9	4	6	3	15	9	2	3	0	0	1	1	5	2-2
1597	Lorient-Rennes	2020-12-20	1	5	5	16	0	0	0	1	0	3	0	3	43	57	11	15	2	4	1	2	19	9	1	2	0	0	0	0	3	0-3
1598	Lille-Paris SG	2020-12-20	1	5	5	16	0	0	1	0	1	1	0	0	31	69	8	8	3	1	4	5	12	11	0	2	0	0	0	0	6	0-0
1599	Rennes-Metz	2020-12-23	1	5	5	17	0	1	0	0	3	0	1	0	62	38	11	9	6	4	6	5	14	18	1	1	0	0	0	0	3	1-0
1600	Lens-Brest	2020-12-23	1	5	5	17	0	1	0	0	3	0	2	1	47	53	11	10	4	3	3	6	13	13	0	2	0	0	1	1	5	1-1
1601	Bordeaux-Reims	2020-12-23	1	5	5	17	0	0	0	1	0	3	1	3	62	38	9	10	3	5	5	5	11	12	3	1	0	0	0	0	4	1-3
1602	Nice-Lorient	2020-12-23	1	5	5	17	0	0	1	0	1	1	2	2	42	58	3	24	3	6	0	10	11	13	1	3	1	0	1	0	5	2-2
1603	Nimes-Dijon	2020-12-23	1	5	5	17	0	0	0	1	0	3	1	3	46	54	8	14	1	4	7	3	10	11	2	2	1	0	0	0	5	1-2
1604	Montpellier-Lille	2020-12-23	1	5	5	17	0	0	0	1	0	3	2	3	47	53	17	9	6	7	6	4	13	11	3	2	0	0	1	0	7	2-3
1605	Lyon-Nantes	2020-12-23	1	5	5	17	0	1	0	0	3	0	3	0	65	35	22	18	11	4	9	7	11	13	1	3	0	0	0	0	3	3-0
1606	Paris SG-Strasbourg	2020-12-23	1	5	5	17	0	1	0	0	3	0	4	0	69	31	17	8	8	2	5	5	7	9	0	0	0	0	0	0	3	3-0
1607	Angers-Marseille	2020-12-23	1	5	5	17	0	1	0	0	3	0	2	1	29	71	9	9	2	3	2	8	14	14	2	4	0	0	1	0	7	2-1
1608	Monaco-Saint-Etienne	2020-12-23	1	5	5	17	0	0	1	0	1	1	2	2	39	61	2	18	2	6	0	10	12	13	3	2	1	0	1	0	2	2-2
1609	Nantes-Rennes	2021-01-06	1	5	5	18	0	0	1	0	1	1	0	0	28	72	7	8	2	0	6	3	13	13	2	2	0	0	0	0	3	0-0
1610	Lorient-Monaco	2021-01-06	1	5	5	18	0	0	0	1	0	3	2	5	40	60	11	16	5	9	5	8	9	9	1	3	1	0	0	0	0	2-5
1611	Metz-Bordeaux	2021-01-06	1	5	5	18	0	0	1	0	1	1	0	0	42	58	9	12	3	3	3	2	10	20	1	2	0	0	0	0	4	0-0
1612	Brest-Nice	2021-01-06	1	5	5	18	0	1	0	0	3	0	2	0	39	61	10	12	6	6	6	6	12	8	2	3	0	0	0	0	5	2-0
1613	Strasbourg-Nimes	2021-01-06	1	5	5	18	0	1	0	0	3	0	5	0	59	41	21	6	12	2	10	5	12	6	1	2	0	0	0	3	3	5-0
1614	Lyon-Lens	2021-01-06	1	5	5	18	0	1	0	0	3	0	3	2	51	49	11	11	6	3	7	4	7	10	1	2	0	0	0	1	4	3-2
1615	Lille-Angers	2021-01-06	1	5	5	18	0	0	0	1	0	3	1	2	66	34	7	7	2	3	8	6	12	10	3	1	0	0	0	0	7	1-2
1616	Saint-Etienne-Paris SG	2021-01-06	1	5	5	18	0	0	1	0	1	1	1	1	31	69	11	10	5	4	9	10	13	12	1	1	0	0	0	0	4	1-1
1617	Marseille-Montpellier	2021-01-06	1	5	5	18	0	1	0	0	3	0	3	1	56	44	17	13	7	5	5	1	4	6	0	0	0	0	0	0	2	3-1
1618	Reims-Dijon	2021-01-06	1	5	5	18	0	0	1	0	1	1	0	0	57	43	9	8	3	0	7	5	13	8	2	3	0	0	0	0	3	0-0
1619	Dijon-Marseille	2021-01-09	1	5	5	19	0	0	1	0	1	1	0	0	41	59	4	11	0	4	0	6	13	13	3	2	0	0	0	0	5	0-0
1620	Bordeaux-Lorient	2021-01-09	1	5	5	19	0	1	0	0	3	0	2	1	48	52	16	12	6	4	5	3	10	10	2	0	0	0	0	0	4	2-1
1621	Lens-Strasbourg	2021-01-09	1	5	5	19	0	0	0	1	0	3	0	1	65	35	11	10	2	4	4	4	16	15	1	1	0	0	0	0	4	0-1
1622	Montpellier-Nantes	2021-01-09	1	5	5	19	0	0	1	0	1	1	1	1	47	53	8	12	6	3	1	8	18	11	5	0	0	0	0	0	3	1-1
1623	Rennes-Lyon	2021-01-09	1	5	5	19	0	0	1	0	1	1	2	2	55	45	14	13	6	4	2	5	12	16	1	2	0	0	0	0	5	2-2
1624	Reims-Saint-Etienne	2021-01-09	1	5	5	19	0	1	0	0	3	0	3	1	35	65	7	14	3	6	0	3	19	17	2	4	0	0	0	1	4	3-1
1625	Nimes-Lille	2021-01-09	1	5	5	19	0	0	0	1	0	3	0	1	49	51	7	10	0	2	2	3	12	13	0	3	0	0	0	0	5	0-1
1626	Metz-Nice	2021-01-09	1	5	5	19	0	0	1	0	1	1	1	1	44	56	16	11	5	4	5	2	19	8	2	2	0	0	1	0	2	1-1
1627	Paris SG-Brest	2021-01-09	1	5	5	19	0	1	0	0	3	0	3	0	61	39	22	12	11	2	7	4	7	13	1	1	0	0	0	0	5	3-0
1628	Monaco-Angers	2021-01-09	1	5	5	19	0	1	0	0	3	0	3	0	56	44	13	6	4	2	5	2	9	10	2	0	0	0	0	0	4	3-0
1629	Montpellier-Monaco	2021-01-15	1	5	5	20	0	0	0	1	0	3	2	3	51	49	9	16	3	5	5	6	17	12	2	3	0	0	1	0	6	2-3
1630	Marseille-Nimes	2021-01-16	1	5	5	20	0	0	0	1	0	3	1	2	64	36	14	8	6	5	7	3	13	6	2	2	0	0	0	1	6	1-2
1631	Angers-Paris SG	2021-01-17	1	5	5	20	0	0	0	1	0	3	0	1	38	62	11	12	4	3	5	7	11	13	0	2	0	0	0	0	4	0-1
1632	Brest-Rennes	2021-01-17	1	5	5	20	0	0	0	1	0	3	1	2	42	58	14	7	4	4	3	3	9	8	1	1	0	0	1	0	4	1-2
1633	Nantes-Lens	2021-01-17	1	5	5	20	0	0	1	0	1	1	1	1	41	59	10	8	2	1	2	4	14	19	3	3	0	0	1	1	2	1-1
1634	Nice-Bordeaux	2021-01-17	1	5	5	20	0	0	0	1	0	3	0	3	50	50	10	17	1	9	3	10	8	7	0	1	0	0	0	0	4	0-3
1635	Strasbourg-Saint-Etienne	2021-01-17	1	5	5	20	0	1	0	0	3	0	1	0	41	59	15	8	3	3	7	3	23	9	2	2	0	0	1	0	4	1-0
1636	Lille-Reims	2021-01-17	1	5	5	20	0	1	0	0	3	0	2	1	61	39	16	8	8	4	3	5	13	11	2	1	0	0	0	0	5	1-1
1637	Lyon-Metz	2021-01-17	1	5	5	20	0	0	0	1	0	3	0	1	64	36	23	17	5	4	9	2	14	11	1	3	0	0	0	0	5	0-0
1638	Marseille-Lens	2020-01-20	1	5	5	9 (recovery)	0	0	0	1	0	3	0	1	46	54	4	13	1	4	3	9	13	12	5	3	0	0	0	0	3	0-1
1639	Paris SG-Montpellier	2021-01-22	1	5	5	21	0	1	0	0	3	0	4	0	73	27	26	5	8	1	7	1	16	12	2	1	0	1	0	0	0	4-0
1640	Lens-Nice	2021-01-23	1	5	5	21	0	0	0	1	0	3	0	1	55	45	13	7	3	2	6	2	9	14	2	1	0	0	0	0	6	0-1
1641	Monaco-Marseille	2021-01-23	1	5	5	21	0	1	0	0	3	0	3	1	54	46	8	5	6	1	5	4	18	21	3	5	0	0	0	0	4	2-1
1642	Bordeaux-Angers	2021-01-24	1	5	5	21	0	1	0	0	3	0	2	1	45	55	7	15	3	7	3	4	11	20	1	2	0	0	0	0	4	2-1
1643	Dijon-Strasbourg	2021-01-24	1	5	5	21	0	0	1	0	1	1	1	1	49	51	5	15	3	2	3	4	14	9	1	0	0	0	0	0	5	1-1
1644	Metz-Nantes	2021-01-24	1	5	5	21	0	1	0	0	3	0	2	0	44	56	14	8	4	0	4	6	15	15	3	1	0	0	0	0	5	1-0
1645	Reims-Brest	2021-01-24	1	5	5	21	0	1	0	0	3	0	1	0	36	64	12	15	2	0	2	4	16	11	3	0	0	0	0	0	4	1-0
1646	Rennes-Lille	2021-01-24	1	5	5	21	0	0	0	1	0	3	0	1	68	32	11	9	2	4	2	2	12	15	2	2	0	0	0	0	5	0-1
1647	Saint-Etienne-Lyon	2021-01-24	1	5	5	21	0	0	0	1	0	3	0	5	40	60	3	19	0	12	1	8	13	9	3	1	0	0	0	0	0	0-5
1648	Lorient-Dijon	2021-01-27	1	5	5	20 (recovery)	0	1	0	0	3	0	3	2	46	54	14	7	5	2	9	6	13	17	2	3	0	0	0	0	6	2-2
1649	Montpellier-Lens	2021-01-31	1	5	5	22	0	0	0	1	0	3	1	2	55	45	17	11	7	2	12	3	15	17	4	4	0	0	0	0	6	1-2
1650	Lyon-Bordeaux	2021-01-31	1	5	5	22	0	1	0	0	3	0	2	1	57	43	10	12	4	2	7	9	17	6	1	2	0	0	0	0	6	1-1
1651	Brest-Metz	2021-01-31	1	5	5	22	0	0	0	1	0	3	2	4	63	37	10	15	5	6	4	1	13	14	1	3	0	0	1	0	4	2-4
1652	Nantes-Monaco	2021-01-31	1	5	5	22	0	0	0	1	0	3	1	2	32	68	9	14	3	5	2	8	11	14	4	3	1	0	0	0	5	1-2
1653	Lorient-Paris SG	2021-01-31	1	5	5	22	0	1	0	0	3	0	3	2	35	65	16	14	5	3	7	9	15	9	4	2	0	0	2	0	4	2-2
1654	Nice-Saint-Etienne	2021-01-31	1	5	5	22	0	0	0	1	0	3	0	1	45	55	7	10	2	1	4	10	11	11	2	2	0	0	0	0	5	0-1
1655	Angers-Nimes	2021-01-31	1	5	5	22	0	1	0	0	3	0	3	1	40	60	12	8	5	4	4	8	9	7	1	3	0	0	1	0	3	3-1
1656	Lille-Dijon	2021-01-31	1	5	5	22	0	1	0	0	3	0	1	0	58	42	14	10	2	3	5	2	12	7	2	2	0	0	0	0	4	1-0
1657	Strasbourg-Reims	2021-01-31	1	5	5	22	0	0	0	1	0	3	0	1	47	53	12	10	2	5	4	3	17	8	1	2	0	0	0	0	5	0-1
1658	Lens-Marseille	2021-02-03	1	5	5	23	0	0	1	0	1	1	2	2	61	39	21	11	3	4	8	4	18	14	4	2	0	0	0	0	4	2-2
1659	Rennes-Lorient	2021-02-03	1	5	5	23	0	0	1	0	1	1	1	1	60	40	10	12	6	3	5	3	17	6	2	1	0	0	0	0	4	1-1
1660	Saint-Etienne-Nantes	2021-02-03	1	5	5	23	0	0	1	0	1	1	1	1	51	49	14	13	8	6	5	5	15	19	3	1	0	0	0	0	3	1-1
1661	Metz-Montpellier	2021-02-03	1	5	5	23	0	0	1	0	1	1	1	1	46	54	17	15	6	4	8	7	15	15	6	1	0	0	0	0	5	1-1
1662	Dijon-Lyon	2021-02-03	1	5	5	23	0	0	0	1	0	3	0	1	37	63	14	16	2	8	1	6	15	12	2	0	0	0	0	0	4	0-1
1663	Bordeaux-Lille	2021-02-03	1	5	5	23	0	0	0	1	0	3	0	3	54	46	10	11	4	6	1	2	8	17	1	2	0	0	0	0	4	0-3
1664	Monaco-Nice	2021-02-03	1	5	5	23	0	1	0	0	3	0	2	1	42	58	15	5	6	2	6	2	16	19	0	4	0	0	0	1	7	2-1
1665	Paris SG-Nimes	2021-02-03	1	5	5	23	0	1	0	0	3	0	3	0	66	34	14	19	6	6	4	7	13	11	0	1	0	0	0	0	3	3-0
1666	Strasbourg-Brest	2021-02-03	1	5	5	23	0	0	1	0	1	1	2	2	41	59	9	3	4	2	3	3	12	14	2	0	0	0	0	0	5	2-1
1667	Reims-Angers	2021-02-03	1	5	5	23	0	0	1	0	1	1	0	0	57	43	10	6	2	2	4	5	6	8	2	1	0	0	0	0	4	0-0
1668	Lorient-Reims	2021-02-06	1	5	5	24	0	1	0	0	3	0	1	0	41	59	10	13	4	3	2	5	12	12	0	4	0	0	0	0	6	1-0
1669	Lyon-Strasbourg	2021-02-06	1	5	5	24	0	1	0	0	3	0	3	0	70	30	16	8	8	1	6	2	7	10	2	2	0	1	0	0	1	3-0
1670	Lens-Rennes	2021-02-06	1	5	5	24	0	0	1	0	1	1	0	0	52	48	10	10	3	1	6	4	13	11	2	4	0	0	0	0	6	0-0
1671	Brest-Bordeaux	2021-02-07	1	5	5	24	0	1	0	0	3	0	2	1	47	53	24	8	6	4	6	4	11	15	1	3	0	0	0	0	4	2-1
1672	Saint-Etienne-Metz	2021-02-07	1	5	5	24	0	1	0	0	3	0	1	0	49	51	12	10	3	0	8	2	9	9	2	2	0	0	0	0	5	1-0
1673	Nimes-Monaco	2021-02-07	1	5	5	24	0	0	0	1	0	3	3	4	44	56	9	11	4	5	5	6	12	16	2	2	0	0	0	0	3	3-4
1674	Montpellier-Dijon	2021-02-07	1	5	5	24	0	1	0	0	3	0	4	2	59	41	24	13	11	5	9	4	12	14	3	3	0	1	1	0	6	3-2
1675	Nice-Angers	2021-02-07	1	5	5	24	0	1	0	0	3	0	3	0	51	49	11	10	2	3	5	9	11	9	2	1	0	0	0	0	5	3-0
1676	Nantes-Lille	2021-02-07	1	5	5	24	0	0	0	1	0	3	0	2	44	56	5	15	2	3	4	2	13	13	3	0	0	0	0	0	4	0-2
1677	Marseille-Paris SG	2021-02-07	1	5	5	24	0	0	0	1	0	3	0	2	53	47	12	9	4	2	7	1	12	12	1	2	1	0	0	0	4	0-2
1678	Paris SG-Nice	2021-02-13	1	5	5	25	0	1	0	0	3	0	2	1	55	45	17	13	4	5	4	1	12	6	2	0	0	0	0	0	3	2-1
1679	Reims-Lens	2021-02-13	1	5	5	25	0	0	1	0	1	1	1	1	36	64	9	17	6	6	4	6	9	7	2	0	0	0	1	0	7	1-1
1680	Lyon-Montpellier	2021-02-13	1	5	5	25	0	0	0	1	0	3	1	2	55	45	24	12	8	5	6	1	9	12	0	1	0	0	0	0	5	1-2
1681	Monaco-Lorient	2021-02-14	1	5	5	25	0	0	1	0	1	1	2	2	70	30	12	5	4	2	7	1	13	13	3	3	0	0	1	1	4	1-2
1682	Rennes-Saint-Etienne	2021-02-14	1	5	5	25	0	0	0	1	0	3	0	2	72	28	13	6	2	3	7	1	18	16	5	2	0	0	0	0	4	0-2
1683	Metz-Strasbourg	2021-02-14	1	5	5	25	0	0	0	1	0	3	1	2	46	54	14	12	3	2	7	7	13	12	2	1	0	0	0	0	3	1-2
1684	Angers-Nantes	2021-02-14	1	5	5	25	0	0	0	1	0	3	1	3	66	34	8	7	3	3	7	2	18	21	2	3	0	0	1	1	7	1-3
1685	Dijon-Nimes	2021-02-14	1	5	5	25	0	0	0	1	0	3	0	2	51	49	10	8	3	4	3	0	17	13	4	1	1	0	0	0	5	0-2
1686	Lille-Brest	2021-02-14	1	5	5	25	0	0	1	0	1	1	0	0	69	31	14	3	0	1	9	3	16	15	2	1	0	0	0	0	4	0-0
1687	Bordeaux-Marseille	2021-02-14	1	5	5	25	0	0	1	0	1	1	1	1	56	44	18	5	1	1	6	5	13	17	1	1	0	2	0	0	3	0-0
1688	Marseille-Nice	2021-02-17	1	5	5	11 (recovery)	0	1	0	0	3	0	3	2	45	55	8	10	4	4	5	3	10	13	2	1	0	0	0	0	5	3-2
1689	Brest-Lyon	2021-02-19	1	5	5	26	0	0	0	1	0	3	2	3	51	49	19	17	7	7	11	7	9	12	2	2	0	0	1	0	7	2-3
1690	Saint-Etienne-Reims	2021-02-20	1	5	5	26	0	0	1	0	1	1	1	1	48	52	18	4	8	2	1	2	10	11	0	2	0	0	0	0	4	1-1
1691	Nantes-Marseille	2021-02-20	1	5	5	26	0	0	1	0	1	1	1	1	34	66	6	7	1	3	2	1	11	15	4	1	0	1	0	0	6	1-1
1692	Montpellier-Rennes	2021-02-21	1	5	5	26	0	1	0	0	3	0	2	1	35	65	12	14	7	5	3	6	10	12	1	2	0	0	0	1	5	2-1
1693	Lens-Dijon	2021-02-21	1	5	5	26	0	1	0	0	3	0	2	1	55	45	11	12	4	4	5	4	13	12	3	0	0	1	0	0	8	2-1
1694	Nice-Metz	2021-02-21	1	5	5	26	0	0	0	1	0	3	1	2	66	34	12	11	3	4	3	3	16	12	1	1	0	0	0	1	2	1-2
1695	Strasbourg-Angers	2021-02-21	1	5	5	26	0	0	1	0	1	1	0	0	58	42	16	7	2	3	5	4	23	10	2	1	0	0	0	0	4	0-0
1696	Nimes-Bordeaux	2021-02-21	1	5	5	26	0	1	0	0	3	0	2	0	29	71	8	11	3	4	6	7	10	12	0	3	0	1	0	0	4	2-0
1697	Lorient-Lille	2021-02-21	1	5	5	26	0	0	0	1	0	3	1	4	44	56	8	16	3	7	1	5	9	9	2	0	0	0	0	0	3	1-3
1698	Paris SG-Monaco	2021-02-21	1	5	5	26	0	0	0	1	0	3	0	2	75	25	10	5	1	3	3	2	12	10	4	1	0	0	0	0	5	0-2
1699	Nimes-Lorient	2021-02-24	1	5	5	21 (recovery)	0	1	0	0	3	0	1	0	49	51	7	11	2	3	4	7	10	14	2	4	0	0	0	1	6	1-0
1700	Rennes-Nice	2021-02-26	1	5	5	27	0	0	0	1	0	3	1	2	63	37	17	14	5	7	6	1	17	18	0	2	0	0	1	0	4	1-2
1701	Bordeaux-Metz	2021-02-27	1	5	5	27	0	0	0	1	0	3	1	2	50	50	8	15	1	5	1	10	18	12	1	2	0	0	0	0	3	1-1
1702	Dijon-Paris SG	2021-02-27	1	5	5	27	0	0	0	1	0	3	0	4	40	60	5	7	1	5	2	4	10	9	2	1	0	0	1	0	3	0-4
1703	Monaco-Brest	2021-02-28	1	5	5	27	0	1	0	0	3	0	2	0	63	37	15	7	9	1	4	2	14	6	2	0	0	0	0	1	3	2-0
1704	Angers-Lens	2021-02-28	1	5	5	27	0	0	1	0	1	1	2	2	39	61	6	14	3	4	6	11	13	16	0	0	0	0	0	1	4	2-1
1705	Reims-Montpellier	2021-02-28	1	5	5	27	0	0	1	0	1	1	0	0	57	43	9	9	2	3	5	1	9	10	1	1	0	0	0	0	2	0-0
1706	Lorient-Saint-Etienne	2021-02-28	1	5	5	27	0	1	0	0	3	0	2	1	55	45	11	9	3	2	5	3	12	15	1	3	0	0	0	0	3	2-1
1707	Nimes-Nantes	2021-02-28	1	5	5	27	0	0	1	0	1	1	1	1	61	39	8	8	4	1	1	8	16	25	2	1	1	0	0	0	5	1-1
1708	Lille-Strasbourg	2021-02-28	1	5	5	27	0	0	1	0	1	1	1	1	68	32	14	10	5	3	9	2	10	14	0	2	0	0	0	0	6	1-1
1709	Marseille-Lyon	2021-02-28	1	5	5	27	0	0	1	0	1	1	1	1	53	47	12	11	2	1	7	2	13	11	4	4	0	1	0	1	6	1-1
1710	Lyon-Rennes	2021-03-03	1	5	5	28	0	1	0	0	3	0	1	0	47	53	15	12	7	1	6	4	12	15	1	3	0	0	0	0	4	1-0
1711	Metz-Angers	2021-03-03	1	5	5	28	0	0	0	1	0	3	0	1	65	35	15	8	1	4	6	1	18	9	2	2	1	0	1	0	5	0-1
1712	Saint-Etienne-Lens	2021-03-03	1	5	5	28	0	0	0	1	0	3	2	3	66	34	18	9	4	5	13	3	13	12	3	2	0	0	1	1	6	1-2
1713	Nice-Nimes	2021-03-03	1	5	5	28	0	1	0	0	3	0	2	1	55	45	10	22	4	7	0	6	14	8	3	3	0	0	0	0	7	2-1
1714	Brest-Dijon	2021-03-03	1	5	5	28	0	1	0	0	3	0	3	1	49	51	10	10	3	2	3	5	17	13	3	1	0	0	0	0	4	3-1
1715	Lille-Marseille	2021-03-03	1	5	5	28	0	1	0	0	3	0	2	0	60	40	23	3	8	1	11	1	12	7	0	1	0	0	0	0	4	1-0
1716	Bordeaux-Paris SG	2021-03-03	1	5	5	28	0	0	0	1	0	3	0	1	44	56	11	12	2	3	8	1	8	15	3	3	0	0	0	0	4	0-1
1717	Strasbourg-Monaco	2021-03-03	1	5	5	28	0	1	0	0	3	0	1	0	37	63	17	5	2	1	5	7	10	12	3	0	0	0	0	0	5	0-0
1718	Montpellier-Lorient	2021-03-03	1	5	5	28	0	0	1	0	1	1	1	1	53	47	10	14	4	6	5	3	17	15	2	3	0	0	1	0	5	1-1
1719	Nantes-Reims	2021-03-03	1	5	5	28	0	0	0	1	0	3	1	2	49	51	12	4	5	2	6	3	10	15	0	5	0	0	0	0	5	1-2
1720	Marseille-Rennes	2021-03-10	1	5	5	22 (recovery)	0	1	0	0	3	0	1	0	51	49	9	10	2	2	3	4	15	19	2	3	0	0	0	0	4	1-0
1721	Reims-Lyon	2021-03-12	1	5	5	29	0	0	1	0	1	1	1	1	32	68	14	17	5	6	2	5	11	12	3	1	0	0	0	0	6	1-0
1722	Angers-Saint-Etienne	2021-03-13	1	5	5	29	0	0	0	1	0	3	0	1	54	46	4	7	1	3	6	3	8	14	1	2	0	0	0	0	5	0-1
1723	Marseille-Brest	2021-03-13	1	5	5	29	0	1	0	0	3	0	3	1	40	60	12	6	6	1	3	6	15	12	3	1	0	0	0	0	3	2-1
1724	Nimes-Montpellier	2021-03-14	1	5	5	29	0	0	1	0	1	1	1	1	40	60	12	12	7	5	5	7	11	19	2	0	0	0	0	0	3	1-1
1725	Lens-Metz	2021-03-14	1	5	5	29	0	0	1	0	1	1	2	2	53	47	16	7	6	4	6	1	17	8	4	3	0	0	1	0	3	2-2
1726	Rennes-Strasbourg	2021-03-14	1	5	5	29	0	1	0	0	3	0	1	0	50	50	11	6	2	1	6	3	13	13	0	2	0	0	0	0	5	1-0
1727	Lorient-Nice	2021-03-14	1	5	5	29	0	0	1	0	1	1	1	1	50	50	17	6	7	2	5	2	2	12	2	2	0	0	0	0	2	1-1
1728	Dijon-Bordeaux	2021-03-14	1	5	5	29	0	0	0	1	0	3	1	3	46	54	13	10	3	6	5	6	15	7	5	1	0	0	0	0	4	1-3
1729	Monaco-Lille	2021-03-14	1	5	5	29	0	0	1	0	1	1	0	0	63	37	8	5	4	2	6	2	11	11	3	3	0	0	0	0	3	0-0
1730	Paris SG-Nantes	2021-03-14	1	5	5	29	0	0	0	1	0	3	1	2	74	26	11	8	5	5	9	1	14	15	2	2	0	0	0	0	7	1-2
1731	Saint-Etienne-Monaco	2021-03-19	1	5	5	30	0	0	0	1	0	3	0	4	40	60	9	15	3	4	2	6	7	11	1	2	0	0	1	0	1	0-4
1732	Metz-Rennes	2021-03-20	1	5	5	30	0	0	0	1	0	3	1	3	52	48	14	9	2	5	4	3	11	12	0	2	0	1	1	0	4	1-3
1733	Nice-Marseille	2021-03-20	1	5	5	30	0	1	0	0	3	0	3	0	43	57	17	7	7	2	7	5	11	16	1	1	0	0	0	0	4	2-0
1734	Strasbourg-Lens	2021-03-21	1	5	5	30	0	0	0	1	0	3	1	2	60	40	17	12	5	4	12	7	9	10	2	5	0	0	0	0	5	1-2
1735	Montpellier-Bordeaux	2021-03-21	1	5	5	30	0	1	0	0	3	0	3	1	44	56	23	13	9	3	6	6	8	10	1	2	0	0	0	0	4	3-1
1736	Brest-Angers	2021-03-21	1	5	5	30	0	0	1	0	1	1	0	0	52	48	11	15	2	5	3	6	17	11	1	3	0	0	0	0	3	0-0
1737	Dijon-Reims	2021-03-21	1	5	5	30	0	0	0	1	0	3	0	1	54	46	10	9	4	2	2	3	10	10	3	0	0	0	0	0	4	0-1
1738	Nantes-Lorient	2021-03-21	1	5	5	30	0	0	1	0	1	1	1	1	37	63	8	15	3	3	2	8	11	8	0	1	0	0	0	0	4	1-1
1739	Lille-Nimes	2021-03-21	1	5	5	30	0	0	0	1	0	3	1	2	73	27	15	10	4	4	8	0	19	10	2	0	0	0	0	0	5	1-2
1740	Lyon-Paris SG	2021-03-21	1	5	5	30	0	0	0	1	0	3	2	4	42	58	8	14	7	9	1	4	14	15	2	0	0	0	0	0	4	2-4
1741	Monaco-Metz	2021-04-03	1	5	5	31	0	1	0	0	3	0	4	0	61	39	15	6	6	1	8	1	16	15	0	6	0	1	0	2	2	4-0
1742	Paris SG-Lille	2021-04-03	1	5	5	31	0	0	0	1	0	3	0	1	65	35	16	3	3	3	5	0	18	12	6	4	1	1	0	0	6	0-1
1743	Lens-Lyon	2021-04-03	1	5	5	31	0	0	1	0	1	1	1	1	40	60	10	15	4	6	2	4	12	14	3	3	0	1	0	0	7	1-1
1744	Angers-Montpellier	2021-04-04	1	5	5	31	0	0	1	0	1	1	1	1	62	38	14	8	4	3	4	0	15	9	1	1	0	0	0	0	2	1-1
1745	Reims-Rennes	2021-04-04	1	5	5	31	0	0	1	0	1	1	2	2	43	57	9	19	4	8	1	6	7	11	3	3	1	0	1	0	4	2-2
1746	Nantes-Nice	2021-04-04	1	5	5	31	0	0	0	1	0	3	1	2	50	50	18	17	6	8	10	5	15	14	1	2	0	0	1	0	4	1-2
1747	Bordeaux-Strasbourg	2021-04-04	1	5	5	31	0	0	0	1	0	3	2	3	62	38	14	12	6	5	6	5	8	15	1	1	0	0	1	1	5	2-3
1748	Lorient-Brest	2021-04-04	1	5	5	31	0	1	0	0	3	0	1	0	46	54	13	5	4	1	6	5	9	23	3	2	0	1	0	0	6	1-0
1749	Nimes-Saint-Etienne	2021-04-04	1	5	5	31	0	0	0	1	0	3	0	2	53	47	14	15	3	5	5	3	12	19	5	2	0	0	0	1	6	0-2
1750	Marseille-Dijon	2021-04-04	1	5	5	31	0	1	0	0	3	0	2	0	64	36	16	4	3	1	7	1	11	9	2	4	0	0	0	0	3	2-0
1751	Metz-Lille	2021-04-09	1	5	5	32	0	0	0	1	0	3	0	2	51	49	18	9	7	6	10	2	16	13	2	2	0	0	0	1	3	0-2
1752	Strasbourg-Paris SG	2021-04-10	1	5	5	32	0	0	0	1	0	3	1	4	37	63	9	16	3	7	5	4	8	6	0	1	0	0	0	0	3	1-4
1753	Montpellier-Marseille	2021-04-10	1	5	5	32	0	0	1	0	1	1	3	3	43	57	20	13	7	8	6	3	17	12	2	2	0	1	0	0	5	2-3
1754	Rennes-Nantes	2021-04-11	1	5	5	32	0	1	0	0	3	0	1	0	64	36	14	4	4	2	3	3	16	15	6	2	0	0	0	0	4	1-0
1755	Lens-Lorient	2021-04-11	1	5	5	32	0	1	0	0	3	0	4	1	38	62	14	17	6	6	5	10	11	8	0	0	0	0	0	2	2	4-1
1756	Nice-Reims	2021-04-11	1	5	5	32	0	0	1	0	1	1	0	0	55	45	13	10	2	1	10	6	13	11	0	1	0	0	0	0	2	0-0
1757	Saint-Etienne-Bordeaux	2021-04-11	1	5	5	32	0	1	0	0	3	0	4	1	37	63	17	10	7	2	5	6	12	17	3	0	0	0	1	2	1	4-1
1758	Brest-Nimes	2021-04-11	1	5	5	32	0	0	1	0	1	1	1	1	64	36	22	5	4	3	9	2	15	16	4	1	0	0	0	0	3	1-1
1759	Monaco-Dijon	2021-04-11	1	5	5	32	0	1	0	0	3	0	3	0	64	36	16	6	10	1	6	4	10	16	1	1	0	0	0	2	3	3-0
1760	Lyon-Angers	2021-04-11	1	5	5	32	0	1	0	0	3	0	3	0	53	47	16	11	6	3	5	4	15	14	0	0	0	0	0	0	5	3-0
1761	Lille-Montpellier	2021-04-16	1	5	5	33	0	0	1	0	1	1	1	1	63	37	20	10	9	4	9	0	14	11	3	1	0	0	0	0	8	1-1
1762	Angers-Rennes	2021-04-17	1	5	5	33	0	0	0	1	0	3	0	3	41	59	10	9	3	3	2	3	11	10	2	0	0	0	0	0	4	0-2
1763	Marseille-Lorient	2021-04-17	1	5	5	33	0	1	0	0	3	0	3	2	73	27	13	12	5	6	8	3	9	15	1	0	0	0	0	0	4	2-2
1764	Paris SG-Saint-Etienne	2021-04-18	1	5	5	33	0	1	0	0	3	0	3	2	72	28	17	7	5	5	13	3	13	15	1	1	0	0	0	1	6	2-1
1765	Brest-Lens	2021-04-18	1	5	5	33	0	0	1	0	1	1	1	1	45	55	7	8	5	2	2	4	14	16	2	7	1	2	1	0	5	1-1
1766	Dijon-Nice	2021-04-18	1	5	5	33	0	1	0	0	3	0	2	0	43	57	9	10	3	2	1	9	8	13	1	1	0	0	0	1	4	2-0
1767	Reims-Metz	2021-04-18	1	5	5	33	0	0	1	0	1	1	0	0	48	52	15	11	6	2	10	4	13	17	3	1	0	0	0	0	5	0-0
1768	Nimes-Strasbourg	2021-04-18	1	5	5	33	0	0	1	0	1	1	1	1	52	48	5	7	1	3	2	1	10	17	0	2	0	1	1	1	6	1-1
1769	Bordeaux-Monaco	2021-04-18	1	5	5	33	0	0	0	1	0	3	0	3	41	59	7	13	2	6	4	5	13	11	4	1	1	0	0	0	4	0-3
1770	Nantes-Lyon	2021-04-18	1	5	5	33	0	0	0	1	0	3	1	2	49	51	12	11	3	4	5	4	16	10	0	1	0	0	1	0	5	1-2
1771	Reims-Marseille	2021-04-23	1	5	5	34	0	0	0	1	0	3	1	3	41	59	10	11	1	6	5	2	9	2	2	0	1	0	0	0	5	1-3
1772	Saint-Etienne-Brest	2021-04-24	1	5	5	34	0	0	0	1	0	3	1	2	43	57	6	12	3	7	3	2	17	11	2	1	0	0	0	0	4	1-2
1773	Metz-Paris SG	2021-04-24	1	5	5	34	0	0	0	1	0	3	1	3	33	67	8	19	3	8	1	9	12	12	1	4	0	0	1	0	4	1-3
1774	Nice-Montpellier	2021-04-25	1	5	5	34	0	1	0	0	3	0	3	1	59	41	18	14	8	3	7	6	13	17	1	2	0	0	0	0	4	3-1
1775	Lens-Nimes	2021-04-25	1	5	5	34	0	1	0	0	3	0	2	1	43	57	7	16	4	2	4	6	14	15	1	2	1	0	1	0	4	2-1
1776	Rennes-Dijon	2021-04-25	1	5	5	34	0	1	0	0	3	0	5	1	74	26	25	4	12	1	8	2	13	8	6	3	0	0	1	0	5	4-1
1777	Strasbourg-Nantes	2021-04-25	1	5	5	34	0	0	0	1	0	3	1	2	65	35	12	7	4	5	6	4	15	13	1	3	0	0	0	0	6	1-2
1778	Lorient-Bordeaux	2021-04-25	1	5	5	34	0	1	0	0	3	0	4	1	44	56	13	13	7	7	6	3	9	14	2	3	0	0	0	0	3	4-1
1779	Angers-Monaco	2021-04-25	1	5	5	34	0	0	0	1	0	3	0	1	41	59	4	10	0	3	4	1	18	11	2	2	0	0	0	0	5	0-1
1780	Lyon-Lille	2021-04-25	1	5	5	34	0	0	0	1	0	3	2	3	46	54	7	16	2	7	8	4	9	13	0	3	0	0	0	0	3	2-3
1781	Marseille-Strasbourg	2021-04-30	1	5	5	35	0	0	1	0	1	1	1	1	68	32	8	8	4	5	5	6	10	14	4	2	0	0	0	0	4	1-1
1782	Paris SG-Lens	2021-05-01	1	5	5	35	0	1	0	0	3	0	2	1	60	40	14	15	6	3	6	2	14	16	4	2	0	0	0	0	6	2-1
1783	Lille-Nice	2021-05-01	1	5	5	35	0	1	0	0	3	0	2	0	56	44	12	0	4	0	5	1	9	12	2	3	0	1	0	0	3	2-0
1784	Bordeaux-Rennes	2021-05-02	1	5	5	35	0	1	0	0	3	0	1	0	46	54	9	9	4	2	3	5	14	14	4	1	0	1	0	0	5	1-0
1785	Dijon-Metz	2021-05-02	1	5	5	35	0	0	0	1	0	3	1	5	45	55	10	14	4	6	6	3	11	16	1	1	1	0	0	0	1	1-5
1786	Nimes-Reims	2021-05-02	1	5	5	35	0	0	1	0	1	1	2	2	50	50	18	12	7	7	10	5	15	13	2	2	0	0	0	0	5	2-2
1787	Lorient-Angers	2021-05-02	1	5	5	35	0	1	0	0	3	0	2	0	50	50	13	9	4	3	5	0	8	13	3	3	1	1	0	1	5	2-0
1788	Brest-Nantes	2021-05-02	1	5	5	35	0	0	0	1	0	3	1	4	59	41	16	12	7	6	5	5	12	10	2	0	0	0	1	0	3	1-4
1789	Montpellier-Saint-Etienne	2021-05-02	1	5	5	35	0	0	0	1	0	3	1	2	46	54	13	19	2	7	7	7	15	12	2	1	0	0	0	0	5	1-2
1790	Monaco-Lyon	2021-05-02	1	5	5	35	0	0	0	1	0	3	2	3	47	53	12	17	4	5	5	5	23	16	1	4	0	1	0	1	7	2-3
1791	Lens-Lille	2021-05-07	1	5	5	36	0	0	0	1	0	3	0	3	49	51	11	11	5	6	5	4	15	9	3	2	1	0	1	0	2	0-3
1792	Nantes-Bordeaux	2021-05-08	1	5	5	36	0	1	0	0	3	0	3	0	49	51	11	10	3	2	5	2	13	20	0	5	0	0	0	1	3	3-0
1793	Lyon-Lorient	2021-05-08	1	5	5	36	0	1	0	0	3	0	4	1	59	41	25	8	11	2	5	1	17	10	2	2	0	0	0	1	3	4-1
1794	Saint-Etienne-Marseille	2021-05-09	1	5	5	36	0	1	0	0	3	0	1	0	45	55	18	15	5	4	10	4	22	12	1	3	0	0	0	0	6	1-0
1795	Strasbourg-Montpellier	2021-05-09	1	5	5	36	0	0	0	1	0	3	2	3	58	42	18	6	7	3	4	6	16	16	2	3	0	0	0	0	6	1-3
1796	Metz-Nimes	2021-05-09	1	5	5	36	0	0	0	1	0	3	0	3	59	41	11	10	2	5	0	6	13	12	1	2	0	0	1	0	4	0-3
1797	Nice-Brest	2021-05-09	1	5	5	36	0	1	0	0	3	0	3	2	63	37	14	9	5	2	7	5	8	11	1	1	1	0	0	0	5	3-2
1798	Angers-Dijon	2021-05-09	1	5	5	36	0	1	0	0	3	0	3	0	44	56	11	5	4	1	1	4	8	11	0	0	0	0	0	0	1	3-0
1799	Reims-Monaco	2021-05-09	1	5	5	36	0	0	0	1	0	3	0	1	39	61	8	7	2	2	3	3	11	13	1	3	0	0	0	0	5	0-1
1800	Rennes-Paris SG	2021-05-09	1	5	5	36	0	0	1	0	1	1	1	1	42	58	19	12	10	4	9	3	12	11	4	1	0	1	1	0	6	1-1
1801	Lille-Saint-Etienne	2021-05-16	1	5	5	37	0	0	1	0	1	1	0	0	59	41	14	8	3	1	3	6	11	14	1	2	0	0	0	0	5	0-0
1802	Paris SG-Reims	2021-05-16	1	5	5	37	0	1	0	0	3	0	4	0	57	43	28	2	10	0	9	5	14	4	0	0	0	1	0	1	2	4-0
1803	Monaco-Rennes	2021-05-16	1	5	5	37	0	1	0	0	3	0	2	1	39	61	11	9	3	2	4	4	12	14	2	2	0	1	0	0	5	2-1
1804	Nimes-Lyon	2021-05-16	1	5	5	37	0	0	0	1	0	3	2	5	43	57	8	21	4	13	3	6	7	13	0	0	0	0	0	0	2	2-5
1805	Marseille-Angers	2021-05-16	1	5	5	37	0	1	0	0	3	0	3	2	53	47	16	11	11	5	3	4	16	12	3	2	0	0	0	1	8	2-2
1806	Bordeaux-Lens	2021-05-16	1	5	5	37	0	1	0	0	3	0	3	0	33	67	11	14	4	4	1	6	16	15	2	2	0	0	0	1	3	2-0
1807	Montpellier-Brest	2021-05-16	1	5	5	37	0	0	1	0	1	1	0	0	41	59	4	22	2	9	1	11	18	13	0	3	1	0	0	0	4	0-0
1808	Nice-Strasbourg	2021-05-16	1	5	5	37	0	0	0	1	0	3	0	2	72	28	7	11	3	5	4	4	9	10	2	1	0	0	0	0	2	0-2
1809	Lorient-Metz	2021-05-16	1	5	5	37	0	1	0	0	3	0	2	1	38	62	6	3	2	1	2	1	16	19	1	4	0	0	0	1	4	2-1
1810	Dijon-Nantes	2021-05-16	1	5	5	37	0	0	0	1	0	3	0	4	71	29	10	16	1	4	3	6	12	10	2	1	0	0	0	0	5	0-2
1811	Metz-Marseille	2021-05-23	1	5	5	38	0	0	1	0	1	1	1	1	35	65	10	9	3	2	1	10	14	10	3	2	0	0	1	1	13	0-0
1812	Strasbourg-Lorient	2021-05-23	1	5	5	38	0	0	1	0	1	1	1	1	52	48	6	7	2	1	2	3	17	9	1	1	0	0	0	0	3	1-1
1813	Nantes-Montpellier	2021-05-23	1	5	5	38	0	0	0	1	0	3	1	2	49	51	15	8	5	5	9	5	8	11	2	2	0	0	1	0	6	1-2
1814	Reims-Bordeaux	2021-05-23	1	5	5	38	0	0	0	1	0	3	1	2	56	44	10	12	3	5	5	2	11	6	1	1	0	0	0	0	4	1-2
1815	Lens-Monaco	2021-05-23	1	5	5	38	0	0	1	0	1	1	0	0	35	65	4	19	1	3	2	7	16	6	3	2	0	0	0	0	3	0-0
1816	Brest-Paris SG	2021-05-23	1	5	5	38	0	0	0	1	0	3	0	2	37	63	6	9	5	4	5	4	7	6	1	2	0	0	1	0	4	0-2
1817	Angers-Lille	2021-05-23	1	5	5	38	0	0	0	1	0	3	1	2	57	43	11	5	4	2	4	2	10	14	0	2	0	0	1	0	3	0-2
1818	Lyon-Nice	2021-05-23	1	5	5	38	0	0	0	1	0	3	2	3	54	46	12	14	6	6	6	6	8	10	1	2	0	0	0	0	4	2-3
1819	Rennes-Nimes	2021-05-23	1	5	5	38	0	1	0	0	3	0	2	0	68	32	12	9	6	2	4	3	11	10	1	0	0	0	0	0	3	2-0
1820	Saint-Etienne-Dijon	2021-05-23	1	5	5	38	0	0	0	1	0	3	0	1	65	35	19	10	5	2	9	3	13	10	1	0	0	0	1	0	4	0-1
1821	Watford-Middlesbrough	2020-09-11	2	1	6	1	0	1	0	0	3	0	1	0	50	50	10	11	2	4	6	6	13	14	1	0	0	0	0	0	5	1-0
1822	Birmingham City-Brentford	2020-09-12	2	1	6	1	0	1	0	0	3	0	1	0	37	63	11	16	3	4	6	3	16	11	4	1	0	0	0	0	5	1-0
1823	Wycombe Wanderers-Rotherham United	2020-09-12	2	1	6	1	0	0	0	1	0	3	0	1	45	55	10	12	3	2	3	4	12	19	1	1	0	0	0	0	5	0-0
1824	Barnsley-Luton Town	2020-09-12	2	1	6	1	0	0	0	1	0	3	0	1	53	47	10	3	1	1	5	6	14	10	1	3	0	0	0	0	6	0-1
1825	AFC Bournemouth-Blackburn Rovers	2020-09-12	2	1	6	1	0	1	0	0	3	0	3	2	49	51	12	14	5	2	5	2	12	16	2	0	0	0	0	0	6	3-2
1826	Bristol City-Coventry City	2020-09-12	2	1	6	1	0	1	0	0	3	0	2	1	46	54	11	16	6	4	5	7	10	12	2	1	0	0	0	0	5	2-1
1827	Cardiff City-Sheffield Wednesday	2020-09-12	2	1	6	1	0	0	0	1	0	3	0	2	62	38	7	8	2	4	4	6	10	19	0	1	0	0	0	0	4	0-2
1828	Derby County-Reading	2020-09-12	2	1	6	1	0	0	0	1	0	3	0	2	58	42	9	8	2	3	6	2	15	7	3	2	0	0	0	0	5	0-2
1829	Huddersfield Town-Norwich City	2020-09-12	2	1	6	1	0	0	0	1	0	3	0	1	48	52	7	16	1	5	3	7	19	15	1	3	0	0	0	0	6	0-1
1830	Millwall-Stoke City	2020-09-12	2	1	6	1	0	0	1	0	1	1	0	0	45	55	9	13	1	4	2	8	15	13	1	1	0	0	0	0	3	0-0
1831	Preston North End-Swansea City	2020-09-12	2	1	6	1	0	0	0	1	0	3	0	1	60	40	11	6	4	1	2	3	16	11	0	0	0	0	0	0	4	0-1
1832	Queens Park Rangers-Nottingham Forest	2020-09-12	2	1	6	1	0	1	0	0	3	0	2	0	49	51	9	6	3	0	4	2	13	11	1	2	0	0	0	1	5	1-0
1833	Coventry City-Queens Park Rangers	2020-09-18	2	1	6	2	0	1	0	0	3	0	3	2	37	63	12	7	5	4	7	4	10	11	1	2	0	0	1	0	4	3-2
1834	Nottingham Forest-Cardiff City	2020-09-19	2	1	6	2	0	0	0	1	0	3	0	2	57	43	13	9	3	4	9	2	8	12	0	0	0	0	0	0	5	0-2
1835	Blackburn Rovers-Wycombe Wanderers	2020-09-19	2	1	6	2	0	1	0	0	3	0	5	0	69	31	23	9	16	1	12	2	17	13	0	1	0	1	0	1	3	5-0
1836	Brentford-Huddersfield Town	2020-09-19	2	1	6	2	0	1	0	0	3	0	3	0	44	56	23	10	6	4	6	3	13	9	1	0	0	0	0	0	4	2-0
1837	Luton Town-Derby County	2020-09-19	2	1	6	2	0	1	0	0	3	0	2	1	35	65	9	14	3	3	4	5	15	13	2	0	0	0	0	0	7	2-1
1838	Middlesbrough-AFC Bournemouth	2020-09-19	2	1	6	2	0	0	1	0	1	1	1	1	51	49	18	9	7	4	7	7	12	20	1	2	0	0	0	0	5	1-1
1839	Norwich City-Preston North End	2020-09-19	2	1	6	2	0	0	1	0	1	1	2	2	55	45	13	16	5	6	4	9	6	13	1	2	0	0	1	0	7	2-2
1840	Reading-Barnsley	2020-09-19	2	1	6	2	0	1	0	0	3	0	2	0	58	42	6	9	5	2	6	5	11	20	1	4	0	2	0	0	4	2-0
1841	Rotherham United-Millwall	2020-09-19	2	1	6	2	0	0	0	1	0	3	0	1	51	49	14	8	1	2	8	3	14	11	1	2	0	0	0	0	5	0-1
1842	Sheffield Wednesday-Watford	2020-09-19	2	1	6	2	0	0	1	0	1	1	0	0	50	50	8	8	1	3	2	8	17	22	2	2	0	0	0	0	5	0-0
1843	Swansea City-Birmingham City	2020-09-19	2	1	6	2	0	0	1	0	1	1	0	0	61	39	8	10	5	3	5	8	10	13	0	1	0	0	0	0	3	0-0
1844	Stoke City-Bristol City	2020-09-20	2	1	6	2	0	0	0	1	0	3	0	2	51	49	8	10	0	4	7	4	14	9	1	1	0	0	0	0	7	0-2
1845	Huddersfield Town-Nottingham Forest	2020-09-25	2	1	6	3	0	1	0	0	3	0	1	0	45	55	15	14	7	4	3	4	12	19	2	4	0	0	0	0	6	1-0
1846	Watford-Luton Town	2020-09-26	2	1	6	3	0	1	0	0	3	0	1	0	49	51	14	4	5	0	11	1	12	15	0	2	0	0	0	0	7	1-0
1847	Wycombe Wanderers-Swansea City	2020-09-26	2	1	6	3	0	0	0	1	0	3	0	2	36	64	8	17	2	6	5	7	9	8	2	0	0	0	0	0	4	0-2
1848	Barnsley-Coventry City	2020-09-26	2	1	6	3	0	0	1	0	1	1	0	0	48	52	13	10	2	0	5	7	11	17	3	2	0	0	0	0	4	0-0
1849	Birmingham City-Rotherham United	2020-09-26	2	1	6	3	0	0	1	0	1	1	1	1	57	43	13	9	5	3	5	6	17	17	1	1	0	0	1	1	4	1-1
1850	Cardiff City-Reading	2020-09-26	2	1	6	3	0	0	0	1	0	3	1	2	53	47	12	6	5	5	6	3	15	9	2	1	0	0	0	0	10	1-2
1851	Derby County-Blackburn Rovers	2020-09-26	2	1	6	3	0	0	0	1	0	3	0	4	63	37	15	23	5	10	9	4	14	11	2	3	0	0	0	0	3	0-4
1852	Millwall-Brentford	2020-09-26	2	1	6	3	0	0	1	0	1	1	1	1	46	54	9	8	3	1	3	5	11	9	3	1	0	0	1	0	3	1-1
1853	Preston North End-Stoke City	2020-09-26	2	1	6	3	0	0	0	1	0	3	0	1	36	64	14	15	4	4	7	7	14	16	1	3	1	0	0	0	6	0-1
1854	Queens Park Rangers-Middlesbrough	2020-09-26	2	1	6	3	0	0	1	0	1	1	1	1	57	43	14	7	7	2	7	5	11	12	0	1	0	0	0	0	4	1-1
1855	Bristol City-Sheffield Wednesday	2020-09-27	2	1	6	3	0	1	0	0	3	0	2	0	58	42	16	7	3	2	6	2	12	18	2	1	0	0	0	0	7	1-0
1856	AFC Bournemouth-Norwich City	2020-09-27	2	1	6	3	0	1	0	0	3	0	1	0	36	64	13	14	5	5	3	8	8	13	1	1	0	0	0	0	5	1-0
1857	Coventry City-AFC Bournemouth	2020-10-02	2	1	6	4	0	0	0	1	0	3	1	3	37	63	5	19	2	10	1	6	10	13	1	3	1	0	0	1	4	1-3
1858	Norwich City-Derby County	2020-10-03	2	1	6	4	0	0	0	1	0	3	0	1	66	34	13	9	5	3	7	2	13	6	3	2	0	0	0	1	5	0-1
1859	Blackburn Rovers-Cardiff City	2020-10-03	2	1	6	4	0	0	1	0	1	1	0	0	61	39	16	16	6	5	5	6	13	15	2	4	0	1	0	0	6	0-0
1860	Luton Town-Wycombe Wanderers	2020-10-03	2	1	6	4	0	1	0	0	3	0	2	0	56	44	16	5	7	1	7	4	10	18	1	1	0	0	0	0	5	2-0
1861	Middlesbrough-Barnsley	2020-10-03	2	1	6	4	0	1	0	0	3	0	2	1	39	61	13	13	6	1	4	3	17	11	6	2	0	0	1	0	6	2-1
1862	Nottingham Forest-Bristol City	2020-10-03	2	1	6	4	0	0	0	1	0	3	1	2	52	48	20	7	6	5	11	5	13	9	0	2	0	0	0	0	6	1-2
1863	Reading-Watford	2020-10-03	2	1	6	4	0	1	0	0	3	0	1	0	44	56	9	11	4	2	1	6	13	19	3	3	0	0	0	0	6	1-0
1864	Rotherham United-Huddersfield Town	2020-10-03	2	1	6	4	0	0	1	0	1	1	1	1	27	73	5	11	2	1	2	6	17	12	1	1	0	0	0	0	8	1-0
1865	Sheffield Wednesday-Queens Park Rangers	2020-10-03	2	1	6	4	0	0	1	0	1	1	1	1	44	56	11	9	2	2	5	7	11	13	2	1	0	0	0	0	8	1-0
1866	Swansea City-Millwall	2020-10-03	2	1	6	4	0	1	0	0	3	0	2	1	58	42	14	12	4	5	5	7	6	12	1	1	0	0	0	0	6	2-1
1867	Brentford-Preston North End	2020-10-04	2	1	6	4	0	0	0	1	0	3	2	4	44	56	13	12	4	7	4	4	10	9	0	0	0	0	0	0	4	2-4
1868	Stoke City-Birmingham City	2020-10-04	2	1	6	4	0	0	1	0	1	1	1	1	65	35	11	4	1	1	5	4	7	14	3	1	0	0	0	0	5	1-1
1869	Derby County-Watford	2020-10-16	2	1	6	5	0	0	0	1	0	3	0	1	53	47	9	8	1	1	3	3	10	10	1	1	0	0	0	0	4	0-1
1870	Barnsley-Bristol City	2020-10-17	2	1	6	5	0	0	1	0	1	1	2	2	52	48	17	13	5	9	4	6	14	10	2	0	0	0	0	1	12	1-2
1871	Birmingham City-Sheffield Wednesday	2020-10-17	2	1	6	5	0	0	0	1	0	3	0	1	60	40	10	14	2	3	5	4	12	12	1	1	0	0	1	0	7	0-1
1872	Blackburn Rovers-Nottingham Forest	2020-10-17	2	1	6	5	0	0	0	1	0	3	0	1	61	39	6	13	2	4	5	3	11	13	2	1	0	0	0	0	5	0-1
1873	AFC Bournemouth-Queens Park Rangers	2020-10-17	2	1	6	5	0	0	1	0	1	1	0	0	54	46	8	6	0	2	3	4	11	14	1	3	0	0	0	0	3	0-0
1874	Brentford-Coventry City	2020-10-17	2	1	6	5	0	1	0	0	3	0	2	0	56	44	17	10	5	5	8	6	13	6	1	1	0	0	0	0	6	2-0
1875	Luton Town-Stoke City	2020-10-17	2	1	6	5	0	0	0	1	0	3	0	2	57	43	18	8	7	3	16	3	13	12	2	2	0	0	0	0	7	0-2
1876	Middlesbrough-Reading	2020-10-17	2	1	6	5	0	0	1	0	1	1	0	0	37	63	8	10	0	1	3	2	19	19	2	3	0	0	0	0	4	0-0
1877	Rotherham United-Norwich City	2020-10-17	2	1	6	5	0	0	0	1	0	3	1	2	37	63	14	21	3	7	7	6	18	12	1	1	1	0	1	1	8	1-1
1878	Swansea City-Huddersfield Town	2020-10-17	2	1	6	5	0	0	0	1	0	3	1	2	51	49	17	10	6	3	15	2	18	16	1	4	0	0	0	1	6	1-2
1879	Wycombe Wanderers-Millwall	2020-10-17	2	1	6	5	0	0	0	1	0	3	1	2	40	60	9	18	3	6	1	2	17	15	1	0	0	0	1	0	9	1-2
1880	Preston North End-Cardiff City	2020-10-18	2	1	6	5	0	0	0	1	0	3	0	1	56	44	7	10	4	3	9	3	9	10	1	0	0	0	0	0	5	0-1
1881	Bristol City-Middlesbrough	2020-10-20	2	1	6	6	0	0	0	1	0	3	0	1	57	43	7	9	0	1	1	4	9	7	0	2	0	0	0	0	0	0-1
1882	Coventry City-Swansea City	2020-10-20	2	1	6	6	0	0	1	0	1	1	1	1	50	50	9	6	3	3	3	2	12	11	0	1	0	0	0	0	5	1-1
1883	Huddersfield Town-Derby County	2020-10-20	2	1	6	6	0	1	0	0	3	0	1	0	54	46	20	12	3	2	6	5	15	11	1	3	0	0	0	0	6	1-0
1884	Millwall-Luton Town	2020-10-20	2	1	6	6	0	1	0	0	3	0	2	0	42	58	21	10	6	1	8	3	15	13	2	1	0	0	0	0	4	2-0
1885	Norwich City-Birmingham City	2020-10-20	2	1	6	6	0	1	0	0	3	0	1	0	73	27	23	6	4	2	6	3	10	12	1	5	0	1	0	0	7	1-0
1886	Nottingham Forest-Rotherham United	2020-10-20	2	1	6	6	0	0	1	0	1	1	1	1	53	47	20	7	4	2	3	3	13	25	0	2	0	0	1	0	5	1-1
1887	Reading-Wycombe Wanderers	2020-10-20	2	1	6	6	0	1	0	0	3	0	1	0	66	34	5	10	1	3	2	1	12	17	2	0	0	0	0	0	5	1-0
1888	Cardiff City-AFC Bournemouth	2020-10-21	2	1	6	6	0	0	1	0	1	1	1	1	33	67	13	17	3	6	6	6	18	15	2	0	0	0	0	0	6	1-1
1889	Queens Park Rangers-Preston North End	2020-10-21	2	1	6	6	0	0	0	1	0	3	0	2	57	43	6	8	0	3	2	2	14	9	0	1	0	0	2	0	5	0-2
1890	Sheffield Wednesday-Brentford	2020-10-21	2	1	6	6	0	0	0	1	0	3	1	2	47	53	6	14	3	5	3	4	14	11	1	0	0	0	0	0	6	1-2
1891	Stoke City-Barnsley	2020-10-21	2	1	6	6	0	0	1	0	1	1	2	2	54	46	8	13	3	7	3	5	11	15	0	0	1	0	0	0	5	2-2
1892	Watford-Blackburn Rovers	2020-10-21	2	1	6	6	0	1	0	0	3	0	3	1	34	66	10	19	4	7	1	8	24	12	3	0	0	0	1	0	6	3-1
1893	Nottingham Forest-Derby County	2020-10-23	2	1	6	7	0	0	1	0	1	1	1	1	59	41	12	12	5	4	8	5	18	8	2	0	0	0	0	0	4	1-1
1894	Watford-AFC Bournemouth	2020-10-24	2	1	6	7	0	0	1	0	1	1	1	1	38	62	9	14	5	5	3	10	16	16	3	2	0	0	0	0	8	1-0
1895	Bristol City-Swansea City	2020-10-24	2	1	6	7	0	0	1	0	1	1	1	1	58	42	9	10	4	2	6	4	10	17	1	5	0	0	0	1	8	1-1
1896	Cardiff City-Middlesbrough	2020-10-24	2	1	6	7	0	0	1	0	1	1	1	1	59	41	17	10	3	1	4	8	16	14	1	0	0	0	0	0	5	1-1
1897	Coventry City-Blackburn Rovers	2020-10-24	2	1	6	7	0	0	0	1	0	3	0	4	34	66	3	24	1	9	0	5	9	12	1	2	1	0	1	0	4	0-4
1898	Huddersfield Town-Preston North End	2020-10-24	2	1	6	7	0	0	0	1	0	3	1	2	55	45	14	17	4	7	8	6	12	14	3	5	1	0	0	0	7	1-2
1899	Millwall-Barnsley	2020-10-24	2	1	6	7	0	0	1	0	1	1	1	1	58	42	12	6	3	2	7	6	8	8	0	2	0	0	0	0	4	1-1
1900	Norwich City-Wycombe Wanderers	2020-10-24	2	1	6	7	0	1	0	0	3	0	2	1	76	24	25	8	6	2	10	6	14	14	1	1	1	0	0	0	7	1-1
1901	Queens Park Rangers-Birmingham City	2020-10-24	2	1	6	7	0	0	1	0	1	1	0	0	62	38	15	10	1	3	3	3	6	11	1	0	0	0	0	0	4	0-0
1902	Reading-Rotherham United	2020-10-24	2	1	6	7	0	1	0	0	3	0	3	0	37	63	7	10	6	2	4	5	9	13	0	2	0	0	0	1	4	2-0
1903	Sheffield Wednesday-Luton Town	2020-10-24	2	1	6	7	0	0	0	1	0	3	0	1	53	47	14	7	3	2	4	2	16	12	1	1	1	0	0	0	5	0-1
1904	Stoke City-Brentford	2020-10-24	2	1	6	7	0	1	0	0	3	0	3	2	33	67	7	9	4	3	2	3	11	10	2	1	0	0	0	0	6	3-1
1905	Barnsley-Queens Park Rangers	2020-10-27	2	1	6	8	0	1	0	0	3	0	3	0	61	39	15	10	11	2	1	5	8	11	0	0	0	1	0	1	3	3-0
1906	Blackburn Rovers-Reading	2020-10-27	2	1	6	8	0	0	0	1	0	3	2	4	66	34	13	5	6	4	3	3	13	9	2	2	0	0	0	0	6	2-4
1907	Brentford-Norwich City	2020-10-27	2	1	6	8	0	0	1	0	1	1	1	1	44	56	13	14	5	3	3	3	19	14	1	1	0	0	0	0	4	1-1
1908	Middlesbrough-Coventry City	2020-10-27	2	1	6	8	0	1	0	0	3	0	2	0	53	47	17	3	5	1	1	2	11	10	2	1	0	0	0	0	7	2-0
1909	Swansea City-Stoke City	2020-10-27	2	1	6	8	0	1	0	0	3	0	2	0	50	50	18	3	6	0	10	2	13	17	2	3	0	0	0	0	5	2-0
1910	Wycombe Wanderers-Watford	2020-10-27	2	1	6	8	0	0	1	0	1	1	1	1	32	68	14	13	6	4	5	7	7	10	0	1	0	0	0	0	6	1-1
1911	Preston North End-Millwall	2020-10-28	2	1	6	8	0	0	0	1	0	3	0	2	57	43	5	13	1	4	2	7	16	4	2	0	0	0	1	0	6	0-2
1912	Birmingham City-Huddersfield Town	2020-10-28	2	1	6	8	0	1	0	0	3	0	2	1	23	77	14	12	4	2	2	4	18	10	2	1	0	0	0	0	10	2-1
1913	AFC Bournemouth-Bristol City	2020-10-28	2	1	6	8	0	1	0	0	3	0	1	0	56	44	12	8	3	3	5	4	10	12	0	0	0	0	0	0	5	1-0
1914	Derby County-Cardiff City	2020-10-28	2	1	6	8	0	0	1	0	1	1	1	1	44	56	15	8	5	2	5	3	12	10	3	3	0	0	0	0	5	1-1
1915	Luton Town-Nottingham Forest	2020-10-28	2	1	6	8	0	0	1	0	1	1	1	1	56	44	6	7	2	1	5	2	15	15	3	0	0	0	0	0	4	1-1
1916	Rotherham United-Sheffield Wednesday	2020-10-28	2	1	6	8	0	1	0	0	3	0	3	0	57	43	15	7	8	2	8	0	12	17	3	2	0	1	0	1	5	3-0
1917	Coventry City-Reading	2020-10-30	2	1	6	9	0	1	0	0	3	0	3	2	41	59	14	14	4	7	4	5	16	9	5	0	0	0	0	0	6	3-1
1918	Bristol City-Norwich City	2020-10-31	2	1	6	9	0	0	0	1	0	3	1	3	44	56	15	19	6	8	5	4	8	16	0	4	0	0	0	1	5	1-3
1919	Barnsley-Watford	2020-10-31	2	1	6	9	0	1	0	0	3	0	1	0	34	66	7	7	2	0	2	3	9	9	1	1	0	0	0	0	5	1-0
1920	AFC Bournemouth-Derby County	2020-10-31	2	1	6	9	0	0	1	0	1	1	1	1	69	31	10	10	5	4	4	1	13	13	2	1	0	0	0	0	6	1-1
1921	Luton Town-Brentford	2020-10-31	2	1	6	9	0	0	0	1	0	3	0	3	48	52	4	12	1	5	5	4	10	12	1	1	0	0	0	0	4	0-3
1922	Middlesbrough-Nottingham Forest	2020-10-31	2	1	6	9	0	1	0	0	3	0	1	0	46	54	12	5	3	1	8	2	8	18	1	2	0	0	0	0	4	1-0
1923	Millwall-Huddersfield Town	2020-10-31	2	1	6	9	0	0	0	1	0	3	0	3	45	55	10	12	4	7	10	2	8	8	2	0	0	0	0	0	4	0-2
1924	Preston North End-Birmingham City	2020-10-31	2	1	6	9	0	0	0	1	0	3	1	2	60	40	11	19	6	6	4	4	17	15	1	0	0	0	0	0	6	1-2
1925	Queens Park Rangers-Cardiff City	2020-10-31	2	1	6	9	0	1	0	0	3	0	3	2	47	53	12	16	6	5	8	4	10	9	4	3	0	0	2	0	8	2-2
1926	Stoke City-Rotherham United	2020-10-31	2	1	6	9	0	1	0	0	3	0	1	0	45	55	8	7	3	0	7	2	16	14	1	2	0	0	0	0	7	1-0
1927	Swansea City-Blackburn Rovers	2020-10-31	2	1	6	9	0	1	0	0	3	0	2	0	41	59	11	11	3	4	9	5	10	10	3	0	0	0	0	0	4	2-0
1928	Wycombe Wanderers-Sheffield Wednesday	2020-10-31	2	1	6	9	0	1	0	0	3	0	1	0	28	72	11	15	3	3	7	9	17	10	2	2	0	0	0	0	7	1-0
1929	Brentford-Swansea City	2020-11-03	2	1	6	10	0	0	1	0	1	1	1	1	55	45	7	13	1	5	2	9	14	20	3	0	0	0	0	0	6	1-1
1930	Huddersfield Town-Bristol City	2020-11-03	2	1	6	10	0	0	0	1	0	3	1	2	63	37	7	10	2	3	3	4	15	10	3	0	0	0	0	0	7	1-2
1931	Norwich City-Millwall	2020-11-03	2	1	6	10	0	0	1	0	1	1	0	0	61	39	27	6	7	0	8	2	14	10	0	1	0	0	0	0	6	0-0
1932	Sheffield Wednesday-AFC Bournemouth	2020-11-03	2	1	6	10	0	1	0	0	3	0	1	0	41	59	10	15	2	5	4	7	23	16	4	2	1	1	0	1	9	1-0
1933	Blackburn Rovers-Middlesbrough	2020-11-03	2	1	6	10	0	0	1	0	1	1	0	0	49	51	6	20	1	3	3	12	19	9	5	1	0	0	0	0	6	0-0
1934	Cardiff City-Barnsley	2020-11-03	2	1	6	10	0	1	0	0	3	0	3	0	50	50	15	4	9	3	2	3	8	15	0	1	0	0	0	1	3	3-0
1935	Reading-Preston North End	2020-11-04	2	1	6	10	0	0	0	1	0	3	0	3	59	41	17	10	5	5	4	1	11	7	1	2	0	0	1	0	5	0-2
1936	Watford-Stoke City	2020-11-04	2	1	6	10	0	1	0	0	3	0	3	2	66	34	12	5	3	3	4	1	12	10	2	2	0	0	0	1	7	2-2
1937	Birmingham City-Wycombe Wanderers	2020-11-04	2	1	6	10	0	0	0	1	0	3	1	2	54	46	17	13	4	3	7	5	12	7	1	0	0	0	0	0	5	1-1
1938	Derby County-Queens Park Rangers	2020-11-04	2	1	6	10	0	0	0	1	0	3	0	1	52	48	7	14	4	3	5	6	9	11	1	0	0	0	0	0	5	0-1
1939	Nottingham Forest-Coventry City	2020-11-04	2	1	6	10	0	1	0	0	3	0	2	1	52	48	15	15	4	7	5	4	16	13	1	2	0	0	0	1	7	1-1
1940	Rotherham United-Luton Town	2020-11-04	2	1	6	10	0	0	0	1	0	3	0	1	56	44	16	10	5	5	5	7	10	18	1	1	0	0	0	0	5	0-1
1941	Cardiff City-Bristol City	2020-11-06	2	1	6	11	0	0	0	1	0	3	0	1	55	45	17	4	5	1	11	2	13	14	1	1	0	0	0	0	6	0-1
1942	Reading-Stoke City	2020-11-07	2	1	6	11	0	0	0	1	0	3	0	3	70	30	15	10	5	3	8	1	7	15	0	2	0	0	0	0	6	0-2
1943	Birmingham City-AFC Bournemouth	2020-11-07	2	1	6	11	0	0	0	1	0	3	1	3	38	62	15	21	3	7	5	10	17	5	2	1	0	0	0	0	5	1-3
1944	Blackburn Rovers-Queens Park Rangers	2020-11-07	2	1	6	11	0	1	0	0	3	0	3	1	51	49	17	11	9	4	12	7	10	9	1	3	0	0	1	0	7	2-1
1945	Brentford-Middlesbrough	2020-11-07	2	1	6	11	0	0	1	0	1	1	0	0	61	39	7	7	1	1	1	4	16	7	1	0	0	0	0	0	6	0-0
1946	Derby County-Barnsley	2020-11-07	2	1	6	11	0	0	0	1	0	3	0	2	71	29	9	17	3	5	4	3	10	13	3	2	0	0	0	0	6	0-2
1947	Huddersfield Town-Luton Town	2020-11-07	2	1	6	11	0	0	1	0	1	1	1	1	67	33	13	7	2	2	4	2	11	13	1	5	0	0	0	0	7	1-1
1948	Norwich City-Swansea City	2020-11-07	2	1	6	11	0	1	0	0	3	0	1	0	57	43	20	19	5	5	4	11	15	21	1	5	0	0	0	0	6	1-0
1949	Nottingham Forest-Wycombe Wanderers	2020-11-07	2	1	6	11	0	1	0	0	3	0	2	0	60	40	13	12	5	6	6	8	12	13	1	2	0	0	0	0	4	2-0
1950	Rotherham United-Preston North End	2020-11-07	2	1	6	11	0	1	0	0	3	0	2	1	43	57	11	8	4	3	3	2	15	13	1	2	0	0	0	0	7	2-1
1951	Sheffield Wednesday-Millwall	2020-11-07	2	1	6	11	0	0	1	0	1	1	0	0	61	39	15	11	7	0	5	4	10	5	2	0	0	0	0	0	8	0-0
1952	Watford-Coventry City	2020-11-07	2	1	6	11	0	1	0	0	3	0	3	2	53	47	12	13	5	3	7	1	16	15	1	2	0	0	0	1	5	3-2
1953	Conventry City-Birminghan City	2020-11-20	2	1	6	12	0	0	1	0	1	1	0	0	52	48	6	7	1	2	1	2	9	11	1	0	0	0	0	0	5	0-0
1954	AFC Bournemouth-Reading	2020-11-21	2	1	6	12	0	1	0	0	3	0	4	2	60	40	10	9	6	5	10	2	13	7	3	1	0	0	1	0	5	4-2
1955	Barnsley-Notthingham Forest	2020-11-21	2	1	6	12	0	1	0	0	3	0	2	0	41	59	13	10	2	3	4	8	9	14	0	1	0	0	0	0	5	2-0
1956	Bristol City-Derby County	2020-11-21	2	1	6	12	0	1	0	0	3	0	1	0	37	63	11	13	3	2	1	6	7	11	1	1	0	0	0	0	6	1-0
1957	Luton Town-Blackburn Rovers	2020-11-21	2	1	6	12	0	0	1	0	1	1	1	1	42	58	13	15	6	5	4	6	11	14	0	4	0	0	0	0	6	1-1
1958	Middlesbroungh-Norwich City	2020-11-21	2	1	6	12	0	0	0	1	0	3	0	1	38	62	9	12	4	2	5	5	14	16	0	1	0	0	1	1	6	0-1
1959	Millwall-Cardiff City	2020-11-21	2	1	6	12	0	0	1	0	1	1	1	1	41	59	7	14	2	6	0	5	13	14	3	0	0	0	0	0	6	1-1
1960	Preston North End-Sheffield Wednesday	2020-11-21	2	1	6	12	0	1	0	0	3	0	1	0	74	26	9	5	1	0	6	6	10	8	0	1	0	1	0	0	5	1-0
1961	Queens Park Rangers-Watford	2020-11-21	2	1	6	12	0	0	1	0	1	1	1	1	56	44	14	10	3	3	7	7	14	12	1	2	0	0	0	0	5	1-1
1962	Stoke City-Huddersfield Town	2020-11-21	2	1	6	12	0	1	0	0	3	0	4	3	32	68	14	10	7	4	4	2	16	14	2	1	0	0	0	0	6	4-3
1963	Swansea City-Rotherham United	2020-11-21	2	1	6	12	0	1	0	0	3	0	1	0	54	46	11	8	4	3	8	7	16	11	1	1	0	0	0	0	6	1-0
1964	Wycombe Wanderers-Brentford	2020-11-21	2	1	6	12	0	0	1	0	1	1	0	0	38	62	11	12	3	4	3	5	11	9	4	2	0	0	0	0	5	0-0
1965	Luton Town-Birminghan City	2020-11-24	2	1	6	13	0	0	1	0	1	1	1	1	57	43	16	11	7	3	8	4	9	11	1	1	0	0	1	0	4	1-1
1966	Queens Park Rangers-Rottherham United	2020-11-24	2	1	6	13	0	1	0	0	3	0	3	2	52	48	14	13	5	5	5	4	9	19	0	3	0	0	0	1	5	3-2
1967	Stoke City-Norwich City	2020-11-24	2	1	6	13	0	0	0	1	0	3	2	3	49	51	24	5	5	3	9	5	19	12	2	4	0	1	0	0	6	2-3
1968	Wycombe Wanderers-Huddersfied Town	2020-11-24	2	1	6	13	0	0	1	0	1	1	0	0	35	65	9	9	1	3	6	4	12	7	0	1	0	0	0	0	7	0-0
1969	Barnsley-Brentford	2020-11-24	2	1	6	13	0	0	0	1	0	3	0	1	32	68	3	13	1	6	2	12	10	6	1	0	0	0	0	0	4	0-1
1970	Preston North End-Blackburn Rovers	2020-11-24	2	1	6	13	0	0	0	1	0	3	0	3	25	75	4	17	0	4	0	4	12	9	1	1	1	0	1	0	5	0-3
1971	AFC Bournemouth-Nottingham Forest	2020-11-24	2	1	6	13	0	1	0	0	3	0	2	0	56	44	12	11	4	3	5	7	11	13	2	0	0	0	0	1	4	2-0
1972	Middlesbrough-Derby County	2020-11-25	2	1	6	13	0	1	0	0	3	0	3	0	37	63	10	10	5	2	4	5	11	16	0	4	0	0	0	0	5	3-0
1973	Millwall-Reading	2020-11-25	2	1	6	13	0	0	1	0	1	1	1	1	51	49	13	7	8	3	5	0	15	14	4	4	0	0	0	0	6	1-1
1974	Britol City-Watford	2020-11-25	2	1	6	13	0	0	1	0	1	1	0	0	36	64	9	7	2	1	5	8	15	10	0	0	0	0	0	0	4	0-0
1975	Coventry City-Cardiff City	2020-11-25	2	1	6	13	0	1	0	0	3	0	1	0	49	51	11	8	5	3	3	5	13	14	1	2	0	0	0	0	8	1-0
1976	Swansea City-Sheffield Wednesday	2020-11-25	2	1	6	13	0	0	1	0	1	1	1	1	64	36	10	4	4	2	6	3	11	14	4	0	0	0	0	0	7	1-1
1977	Brentford-Queens Park Rangers	2020-11-27	2	1	6	14	0	1	0	0	3	0	2	1	43	57	14	10	6	2	2	9	8	13	2	4	0	1	0	0	6	2-1
1978	Reading-Bristol City	2020-11-28	2	1	6	14	0	1	0	0	3	0	3	1	45	55	21	4	10	2	5	1	14	13	0	2	0	0	0	0	6	2-1
1979	Birmingham City-Millwall	2020-11-28	2	1	6	14	0	0	1	0	1	1	0	0	54	46	8	9	2	1	3	6	16	10	2	1	0	0	0	0	5	0-0
1980	Blackburn Rovers-Barnsley	2020-11-28	2	1	6	14	0	1	0	0	3	0	2	1	62	38	7	23	6	5	3	11	14	13	2	0	0	0	0	0	6	2-1
1981	Cardiff City-Luton Town	2020-11-28	2	1	6	14	0	1	0	0	3	0	4	0	39	61	20	5	6	0	11	4	12	7	1	0	0	0	0	0	3	4-0
1982	Derby County-Wycombe Wanderers	2020-11-28	2	1	6	14	0	0	1	0	1	1	1	1	55	45	11	8	5	2	5	3	13	14	0	1	0	0	0	0	10	1-1
1983	Huddersfield Town- Middlesbrough	2020-11-28	2	1	6	14	0	1	0	0	3	0	3	2	62	38	13	10	5	3	5	9	17	12	4	3	0	0	1	0	7	3-2
1984	Norwich City-Coventry City	2020-11-28	2	1	6	14	0	0	1	0	1	1	1	1	63	37	9	13	6	4	1	8	13	9	2	0	0	0	0	1	6	1-1
1985	Rotherham United- AFC Bournemouth	2020-11-28	2	1	6	14	0	0	1	0	1	1	2	2	35	65	13	11	5	5	7	4	20	16	2	3	0	0	1	0	5	2-2
1986	Sheffield Wednesday-Stoke CIty	2020-11-28	2	1	6	14	0	0	1	0	1	1	0	0	37	63	5	8	0	2	1	5	16	12	4	2	0	0	0	0	6	0-0
1987	Watford-Preston North End	2020-11-28	2	1	6	14	0	1	0	0	3	0	4	1	59	41	26	9	11	4	9	3	7	2	1	0	0	0	0	1	3	4-1
1988	Nottingham Forest- Swansea City	2020-11-29	2	1	6	14	0	0	0	1	0	3	0	1	49	51	13	13	1	3	6	8	17	12	4	2	0	0	0	0	6	0-1
1989	Cardiff CIty-Huddersfield Town	2020-12-01	2	1	6	15	0	1	0	0	3	0	3	0	33	67	10	10	4	4	4	2	17	9	1	1	0	0	0	0	4	3-0
1990	Bimingham City-Barnsley	2020-12-01	2	1	6	15	0	0	0	1	0	3	1	2	53	47	5	12	1	3	1	1	13	10	2	1	0	0	1	0	6	1-2
1991	AFC Bournemouth-Preston Notrh End	2020-12-01	2	1	6	15	0	0	0	1	0	3	2	3	54	46	15	8	4	5	1	4	11	16	2	3	0	0	0	0	12	2-3
1992	Derby County-Coventry City	2020-12-01	2	1	6	15	0	0	1	0	1	1	1	1	54	46	12	9	3	3	2	2	13	13	4	1	0	0	0	0	5	0-1
1993	Queens Park Rangers-Bristol City	2020-12-01	2	1	6	15	0	0	0	1	0	3	1	2	64	36	19	12	4	3	9	2	16	8	2	1	0	0	0	0	6	1-2
[truncated: 1,907 more rows]

## Sheet: 2014-2015 -> 2019-2020
Season	Team	Victory_H	Draw_H	Victory_A
2019/2020	closed doors (no France, interrupted)	349	216	276
2019/2020	open doors (France included)	1235	794	832
2018/2019	FC Barcelona	15	3	11
2018/2019	Atlético de Madrid	15	3	7
2018/2019	Real Madrid	13	1	8
2018/2019	Valencia CF	7	10	8
2018/2019	Getafe CF	11	3	4
2018/2019	Sevilla FC	12	3	5
2018/2019	RCD Espanyol de Barcelona	11	3	3
2018/2019	Athletic Club	9	8	4
2018/2019	Real Sociedad	7	6	6
2018/2019	Real Betis	8	5	6
2018/2019	D. Alavés	7	8	6
2018/2019	SD Eibar	9	6	2
2018/2019	CD Leganés	7	8	4
2018/2019	Villarreal CF	5	8	5
2018/2019	Levante UD	6	7	5
2018/2019	Real Valladolid CF	5	5	5
2018/2019	RC Celta	8	5	2
2018/2019	Girona FC	3	6	6
2018/2019	SD Huesca	5	6	2
2018/2019	Rayo Vallecano	5	6	3
2018/2019	Manchester City	18	0	14
2018/2019	Liverpool	17	2	13
2018/2019	Chelsea	12	6	9
2018/2019	Tottenham	12	2	11
2018/2019	Arsenal	14	3	7
2018/2019	Manchester United	10	6	9
2018/2019	Wolves	10	4	6
2018/2019	Everton	10	4	5
2018/2019	Leicester	8	3	7
2018/2019	West Ham	9	4	6
2018/2019	Watford	8	3	6
2018/2019	Crystal Palace	5	5	9
2018/2019	Newcastle	8	1	4
2018/2019	AFC Bournemouth	8	5	5
2018/2019	Burnley	7	2	4
2018/2019	Southampton	5	8	4
2018/2019	Brighton	6	5	3
2018/2019	Cardiff City	6	2	4
2018/2019	Fulham	6	3	1
2018/2019	Huddersfield Town	2	3	1
2018/2019	FC Bayern München	13	3	11
2018/2019	Borussia Dortmund	14	2	9
2018/2019	RB Leipzig	10	6	9
2018/2019	Bayer 04 Leverkusen	9	2	9
2018/2019	B. Mönchengladbach	9	3	7
2018/2019	VfL Wolfsburg	8	5	8
2018/2019	Eintracht Frankfurt	8	4	7
2018/2019	SV Werder Bremen	8	6	6
2018/2019	TSG 1899 Hoffenheim	7	5	6
2018/2019	Fortuna Düsseldorf	9	0	4
2018/2019	Hertha BSC	6	6	5
2018/2019	1. FSV Mainz 05	8	5	4
2018/2019	Sport-Club Freiburg	6	7	2
2018/2019	FC Schalke 04	4	3	4
2018/2019	FC Augsburg	5	4	3
2018/2019	VfB Stuttgart	6	4	1
2018/2019	Hannover 96	5	1	0
2018/2019	1. FC Nürnberg	3	7	0
2018/2019	Juventus	15	4	13
2018/2019	Napoli	13	4	11
2018/2019	Atalanta	10	5	10
2018/2019	Inter	11	5	9
2018/2019	Milan	12	4	7
2018/2019	Roma	12	5	6
2018/2019	Torino	12	2	4
2018/2019	Lazio	9	5	8
2018/2019	Sampdoria	10	2	5
2018/2019	Bologna	9	4	2
2018/2019	Sassuolo	5	10	4
2018/2019	Udinese	8	5	3
2018/2019	SPAL	5	7	6
2018/2019	Parma	5	7	5
2018/2019	Cagliari	8	6	2
2018/2019	Fiorentina	5	9	3
2018/2019	Genoa	6	8	2
2018/2019	Empoli	9	3	1
2018/2019	Frosinone	1	6	4
2018/2019	ChievoVerona	1	7	1
2018/2019	Paris SG	17	2	12
2018/2019	Lille	13	4	9
2018/2019	Lyon	12	4	9
2018/2019	Saint-Etienne	13	2	6
2018/2019	Marseille	11	4	7
2018/2019	Montpellier	8	8	7
2018/2019	Nice	10	4	5
2018/2019	Reims	8	7	5
2018/2019	Nimes	9	5	6
2018/2019	Rennes	8	7	5
2018/2019	Strasbourg	6	8	5
2018/2019	Nantes	9	4	4
2018/2019	Angers	5	9	5
2018/2019	Bordeaux	7	6	3
2018/2019	Amiens	7	5	2
2018/2019	Toulouse	4	6	4
2018/2019	Monaco	4	6	4
2018/2019	Dijon	6	4	3
2018/2019	Caen	4	5	3
2018/2019	Guingamp	3	7	2
2017/2018	FC Barcelona	16	3	12
2017/2018	Atlético de Madrid	12	6	11
2017/2018	Real Madrid	12	4	10
2017/2018	Valencia CF	13	3	9
2017/2018	Villarreal CF	11	3	7
2017/2018	Real Betis	10	4	8
2017/2018	Sevilla FC	11	5	6
2017/2018	Getafe CF	9	4	6
2017/2018	SD Eibar	8	4	6
2017/2018	Girona FC	8	3	6
2017/2018	RCD Espanyol de Barcelona	8	6	4
2017/2018	Real Sociedad	10	3	4
2017/2018	RC Celta	8	8	5
2017/2018	D. Alavés	9	1	6
2017/2018	Levante UD	7	6	4
2017/2018	Athletic Club	6	8	4
2017/2018	CD Leganés	9	4	3
2017/2018	RC Deportivo	4	6	2
2017/2018	UD Las Palmas	4	2	1
2017/2018	Málaga CF	4	3	1
2017/2018	Manchester City	16	2	16
2017/2018	Manchester United	15	2	10
2017/2018	Tottenham	13	4	10
2017/2018	Liverpool	12	7	9
2017/2018	Chelsea	11	4	10
2017/2018	Arsenal	15	2	4
2017/2018	Burnley	7	5	7
2017/2018	Everton	10	4	3
2017/2018	Leicester	7	6	5
2017/2018	Newcastle	8	4	4
2017/2018	Crystal Palace	7	5	4
2017/2018	AFC Bournemouth	7	5	4
2017/2018	West Ham	7	6	3
2017/2018	Watford	7	6	4
2017/2018	Brighton	7	8	2
2017/2018	Huddersfield Town	6	5	3
2017/2018	Southpamton	4	7	3
2017/2018	Swansea City	6	3	2
2017/2018	Stoke City	5	5	2
2017/2018	West Bromwich Albion	3	9	3
2017/2018	FC Bayern München	14	2	13
2017/2018	FC Schalke 04	10	5	8
2017/2018	TSG 1899 Hoffenheim	11	4	4
2017/2018	Borussia Dortmund	9	4	6
2017/2018	Bayer 04 Leverkusen	8	5	7
2017/2018	RB Leipzig	9	4	6
2017/2018	VfB Stuttgart	10	4	5
2017/2018	Eintracht Frankfurt	8	4	6
2017/2018	B. Mönchengladbach	9	4	4
2017/2018	Hertha BSC	5	7	5
2017/2018	SV Werder Bremen	6	7	4
2017/2018	FC Augsburg	6	4	4
2017/2018	Hannover 96	8	3	2
2017/2018	1. FSV Mainz 05	7	3	2
2017/2018	Sport-Club Freiburg	7	6	1
2017/2018	VfL Wolfsburg	3	8	3
2017/2018	Hamburger SV	6	4	2
2017/2018	1. FC Köln	3	5	2
2017/2018	Juventus	16	1	14
2017/2018	Napoli	14	3	14
2017/2018	Roma	11	2	12
2017/2018	Inter	11	5	9
2017/2018	Lazio	9	5	12
2017/2018	Milan	10	5	8
2017/2018	Atalanta	9	6	7
2017/2018	Fiorentina	8	5	8
2017/2018	Torino	8	6	5
2017/2018	Sampdoria	12	3	4
2017/2018	Sassuolo	4	7	7
2017/2018	Genoa	6	3	5
2017/2018	ChievoVerona	7	6	3
2017/2018	Udinese	6	2	6
2017/2018	Bologna	6	4	5
2017/2018	Cagliari	6	3	5
2017/2018	SPAL	5	8	3
2017/2018	Crotone	6	6	3
2017/2018	H. Verona	5	1	2
2017/2018	Benevento	5	2	1
2017/2018	Paris SG	17	1	12
2017/2018	Monaco	15	3	9
2017/2018	Lyon	12	5	11
2017/2018	Marseille	12	5	10
2017/2018	Rennes	8	4	8
2017/2018	Bordeaux	9	4	7
2017/2018	Saint-Etienne	8	7	7
2017/2018	Nice	10	3	5
2017/2018	Nantes	8	4	6
2017/2018	Montpellier	5	9	6
2017/2018	Dijon	11	3	2
2017/2018	Guingamp	8	7	4
2017/2018	Amiens	8	5	4
2017/2018	Angers	5	7	4
2017/2018	Strasbourg	7	6	2
2017/2018	Caen	7	5	3
2017/2018	Lille	6	6	4
2017/2018	Toulouse	7	5	2
2017/2018	Troyes	7	3	2
2017/2018	Metz	3	4	3
2016/2017	Real Madrid	14	4	15
2016/2017	FC Barcelona	15	3	13
2016/2017	Atlético de Madrid	14	2	9
2016/2017	Sevilla FC	14	4	7
2016/2017	Villarreal CF	11	4	8
2016/2017	Real Sociedad	10	5	9
2016/2017	Athletic Club	13	4	6
2016/2017	RCD Espanyol de Barcelona	8	5	7
2016/2017	D. Alavés	7	8	7
2016/2017	SD Eibar	10	3	5
2016/2017	Málaga CF	10	2	2
2016/2017	Valencia CF	8	4	5
2016/2017	RC Celta	9	2	4
2016/2017	UD Las Palmas	9	6	1
2016/2017	Real Betis	6	7	4
2016/2017	RC Deportivo	7	5	1
2016/2017	CD Leganés	5	6	3
2016/2017	Real Sporting	5	4	2
2016/2017	C.A. Osasuna	2	7	2
2016/2017	Granada CF	4	4	0
2016/2017	Chelsea	17	0	13
2016/2017	Tottenham	17	2	9
2016/2017	Manchester City	11	7	12
2016/2017	Liverpool	12	5	10
2016/2017	Arsenal	14	3	9
2016/2017	Manchester United	8	10	10
2016/2017	Everton	13	4	4
2016/2017	Southpamton	6	6	6
2016/2017	AFC Bournemouth	9	4	3
2016/2017	West Bromwich Albion	9	2	3
2016/2017	West Ham	7	4	5
2016/2017	Leicester	10	4	2
2016/2017	Stoke City	7	6	4
2016/2017	Crystal Palace	6	2	6
2016/2017	Swansea City	8	3	4
2016/2017	Burnley	10	3	1
2016/2017	Watford	8	4	3
2016/2017	Hull City	8	4	1
2016/2017	Middlesbrough	4	6	1
2016/2017	Sunderland	3	5	3
2016/2017	FC Bayern München	13	4	12
2016/2017	RB Leipzig	12	2	8
2016/2017	Borussia Dortmund	13	4	5
2016/2017	TSG 1899 Hoffenheim	11	6	5
2016/2017	1. FC Köln	9	6	3
2016/2017	Hertha BSC	12	1	3
2016/2017	Sport-Club Freiburg	10	2	4
2016/2017	SV Werder Bremen	8	1	5
2016/2017	B. Mönchengladbach	7	5	5
2016/2017	FC Schalke 04	8	5	3
2016/2017	Eintracht Frankfurt	7	7	4
2016/2017	Bayer 04 Leverkusen	5	6	6
2016/2017	FC Augsburg	5	6	4
2016/2017	Hamburger SV	8	4	2
2016/2017	1. FSV Mainz 05	7	4	3
2016/2017	VfL Wolfsburg	5	3	5
2016/2017	FC Ingolstadt 04	4	5	4
2016/2017	SV Darmstadt 98	6	3	1
2016/2017	Juventus	18	1	11
2016/2017	Roma	16	1	12
2016/2017	Napoli	13	4	13
2016/2017	Atalanta	12	4	9
2016/2017	Lazio	12	2	9
2016/2017	Milan	12	2	6
2016/2017	Inter	11	3	8
2016/2017	Fiorentina	10	8	6
2016/2017	Torino	9	8	4
2016/2017	Sassuolo	8	3	6
2016/2017	Sampdoria	8	6	4
2016/2017	Cagliari	11	3	3
2016/2017	Udinese	8	5	4
2016/2017	ChievoVerona	6	5	6
2016/2017	Bologna	8	2	3
2016/2017	Genoa	6	7	3
2016/2017	Crotone	6	4	3
2016/2017	Empoli	5	4	3
2016/2017	Palermo	4	3	2
2016/2017	Pescara	2	5	0
2016/2017	Monaco	17	1	13
2016/2017	Paris SG	13	6	14
2016/2017	Nice	14	4	8
2016/2017	Lyon	12	1	9
2016/2017	Marseille	13	4	4
2016/2017	Bordeaux	9	6	6
2016/2017	Nantes	8	4	6
2016/2017	Rennes	10	6	2
2016/2017	Saint-Etienne	7	9	5
2016/2017	Guingamp	12	3	2
2016/2017	Angers	8	5	5
2016/2017	Lille	7	3	6
2016/2017	Toulouse	8	6	2
2016/2017	Metz	7	7	4
2016/2017	Montpelllier	8	5	2
2016/2017	Dijon	7	6	1
2016/2017	Caen	7	2	3
2016/2017	Lorient	7	4	3
2016/2017	Nancy	7	3	2
2016/2017	Bastia	5	9	3
2015/2016	FC Barcelona	16	1	13
2015/2016	Real Madrid	16	1	12
2015/2016	Atlético de Madrid	15	3	13
2015/2016	Villarreal CF	12	4	6
2015/2016	Athletic Club	11	4	7
2015/2016	RC Celta	9	6	8
2015/2016	Sevilla FC	14	1	0
2015/2016	Malaga CF	8	6	4
2015/2016	Real Sociedad	7	5	6
2015/2016	Real Betis	6	6	5
2015/2016	UD Las Palmas	8	5	4
2015/2016	Valencia CF	6	7	5
2015/2016	SD Eibar	8	5	3
2015/2016	RCD Espanyol de Barcelona	9	5	3
2015/2016	RC Deportivo	4	8	4
2015/2016	Granada CF	6	5	4
2015/2016	Real Sporting	7	4	3
2015/2016	Rayo Vallecano	8	4	1
2015/2016	Getafe CF	6	7	3
2015/2016	Levante UD	7	5	1
2015/2016	Leicester	12	6	11
2015/2016	Arsenal	12	4	8
2015/2016	Tottenham	10	6	9
2015/2016	Manchester City	12	2	7
2015/2016	Manchester United	12	5	7
2015/2016	Southampton	11	3	7
2015/2016	West Ham	9	7	7
2015/2016	Liverpool	8	8	8
2015/2016	Stoke City	8	4	6
2015/2016	Chelsea	5	9	7
2015/2016	Everton	6	5	5
2015/2016	Swansea City	8	6	4
2015/2016	Watford	6	6	6
2015/2016	West Bromwich Albion	6	5	4
2015/2016	Crystal Palace	6	3	5
2015/2016	AFC Bournemouth	5	5	6
2015/2016	Sunderland	6	6	3
2015/2016	Newcastle	7	7	2
2015/2016	Norwich	6	5	3
2015/2016	Aston Villa	2	5	1
2015/2016	FC Bayern München	15	1	13
2015/2016	Borussia Dortmund	14	3	10
2015/2016	Bayer 04 Leverkusen	10	3	8
2015/2016	B. Mönchengladbach	13	1	4
2015/2016	FC Schalke 04	8	5	7
2015/2016	1. FSV Mainz 05	8	4	6
2015/2016	Hertha BSC	9	5	5
2015/2016	VfL Wolfsburg	9	5	3
2015/2016	1. FC Köln	5	5	5
2015/2016	Hamburger SV	5	4	6
2015/2016	FC Ingolstadt 04	7	5	3
2015/2016	FC Augsburg	3	6	6
2015/2016	SV Werder Bremen	5	5	5
2015/2016	SV Darmstadt 98	2	6	7
2015/2016	TSG 1899 Hoffenheim	6	6	3
2015/2016	Eintracht Frankfurt	6	6	3
2015/2016	VfB Stuttgart	6	1	3
2015/2016	Hannover 96	4	0	3
2015/2016	Juventus	16	2	13
2015/2016	Napoli	16	3	9
2015/2016	Roma	13	5	10
2015/2016	Inter	13	2	7
2015/2016	Fiorentina	11	5	7
2015/2016	Sassuolo	8	8	8
2015/2016	Milan	9	6	6
2015/2016	Lazio	10	3	5
2015/2016	ChievoVerona	7	8	6
2015/2016	Genoa	10	3	3
2015/2016	Empoli	7	6	5
2015/2016	Torino	6	6	6
2015/2016	Atalanta	8	6	6
2015/2016	Bologna	5	5	3
2015/2016	Sampdoria	8	4	2
2015/2016	Palermo	6	4	4
2015/2016	Udinese	6	4	4
2015/2016	Carpi	6	5	3
2015/2016	Frosinone	6	4	2
2015/2016	H. Verona	4	6	1
2015/2016	Paris SG	15	3	15
2015/2016	Lyon	12	4	7
2015/2016	Monaco	10	6	7
2015/2016	Nice	12	2	6
2015/2016	Lille	9	6	6
2015/2016	Saint-Etienne	10	4	7
2015/2016	Caen	9	3	7
2015/2016	Rennes	6	7	7
2015/2016	Angers	6	8	7
2015/2016	Bastia	11	2	3
2015/2016	Bordeaux	8	7	4
2015/2016	Montpellier	9	0	5
2015/2016	Marseille	3	11	7
2015/2016	Nantes	8	5	4
2015/2016	Lorient	7	7	4
2015/2016	Guingamp	6	7	5
2015/2016	Toulouse	6	7	3
2015/2016	Reims	7	5	3
2015/2016	Gazelec Ajaccio	5	7	3
2015/2016	Troyes	1	7	2
2014/2015	FC Barcelona	16	1	14
2014/2015	Real Madrid	16	2	14
2014/2015	Atlético de Madrid	14	3	9
2014/2015	Valencia CF	15	3	7
2014/2015	Sevilla FC	13	5	10
2014/2015	Villarreal CF	12	1	4
2014/2015	Athletic Club	8	6	7
2014/2015	RC Celta	8	5	5
2014/2015	Malaga CF	8	6	6
2014/2015	RCD Espanyol de Barcelona	8	6	5
2014/2015	Rayo Vallecano	8	2	7
2014/2015	Real Sociedad	9	5	2
2014/2015	Elche C.F.	6	3	5
2014/2015	Levante UD	6	6	3
2014/2015	Getafe CF	6	5	4
2014/2015	RC Deportivo	5	6	2
2014/2015	Granada CF	4	10	3
2014/2015	SD Eibar	5	3	4
2014/2015	UD Almería	3	7	5
2014/2015	Cordoba CF	1	6	2
2014/2015	Chelsea	15	4	11
2014/2015	Manchester City	14	3	10
2014/2015	Arsenal	12	5	10
2014/2015	Manchester United	14	2	6
2014/2015	Tottenham	10	3	9
2014/2015	Liverpool	10	5	8
2014/2015	Southampton	11	4	7
2014/2015	Swansea City	9	5	7
2014/2015	Stoke City	10	3	5
2014/2015	Crystal Palace	6	3	7
2014/2015	Everton	7	7	5
2014/2015	West Ham	9	4	3
2014/2015	West Bromwich Albion	7	4	4
2014/2015	Leicester	7	5	4
2014/2015	Newcastle	7	5	3
2014/2015	Sunderland	4	8	3
2014/2015	Aston Villa	5	6	5
2014/2015	Hull City	5	5	3
2014/2015	Burnley	4	7	3
2014/2015	Queens Park Rangers	6	5	2
2014/2015	FC Bayern München	14	1	11
2014/2015	VfL Wolfsburg	13	4	7
2014/2015	B. Mönchengladbach	12	3	7
2014/2015	Bayer 04 Leverkusen	10	6	7
2014/2015	FC Augsburg	9	4	6
2014/2015	FC Schalke 04	10	5	3
2014/2015	Borussia Dortmund	9	3	4
2014/2015	TSG 1899 Hoffenheim	9	3	3
2014/2015	Eintracht Frankfurt	9	5	2
2014/2015	SV Werder Bremen	8	4	3
2014/2015	1. FSV Mainz 05	6	6	3
2014/2015	1. FC Köln	4	9	5
2014/2015	Hannover 96	6	4	3
2014/2015	VfB Stuttgart	5	4	4
2014/2015	Hertha BSC	6	4	3
2014/2015	Hamburger SV	6	5	3
2014/2015	Sport-Club Freiburg	5	6	2
2014/2015	SC Paderborn 07	4	6	3
2014/2015	Juventus	16	3	10
2014/2015	Roma	10	7	9
2014/2015	Lazio	12	1	9
2014/2015	Fiorentina	9	6	9
2014/2015	Napoli	11	5	7
2014/2015	Genoa	9	6	7
2014/2015	Sampdoria	7	10	7
2014/2015	Inter	7	7	6
2014/2015	Torino	8	7	6
2014/2015	Milan	9	5	4
2014/2015	Palermo	8	6	4
2014/2015	Sassuolo	7	8	5
2014/2015	H. Verona	7	5	4
2014/2015	ChievoVerona	4	9	6
2014/2015	Empoli	6	8	2
2014/2015	Udinese	6	5	4
2014/2015	Atalanta	4	7	3
2014/2015	Cagliari	4	4	4
2014/2015	Cesena	3	7	1
2014/2015	Parma	5	4	1
2014/2015	Paris SG	15	4	9
2014/2015	Lyon	14	3	8
2014/2015	Monaco	8	9	12
2014/2015	Marseille	13	2	8
2014/2015	Saint-Etienne	12	5	7
2014/2015	Bordeaux	12	5	5
2014/2015	Montpellier	11	2	5
2014/2015	Lille	11	5	5
2014/2015	Rennes	8	5	5
2014/2015	Guingamp	9	1	6
2014/2015	Nice	6	6	7
2014/2015	Bastia	8	7	4
2014/2015	Caen	7	3	5
2014/2015	Nantes	7	7	4
2014/2015	Reims	8	3	4
2014/2015	Lorient	6	5	6
2014/2015	Toulouse	8	6	4
2014/2015	Evian	7	2	4
2014/2015	Metz	6	4	1
2014/2015	Lens	5	4	2
2018/2019	C.A. Osasuna	19	2	7
2018/2019	Granada CF	13	6	9
2018/2019	Málaga CF	12	4	9
2018/2019	Albacete BP	9	10	10
2018/2019	RCD Mallorca	15	4	4
2018/2019	RC Deportivo	10	8	7
2018/2019	Cádiz CF	9	10	7
2018/2019	Real Oviedo	10	9	7
2018/2019	Real Sporting	10	6	6
2018/2019	UD Almería	10	8	5
2018/2019	Elche C.F.	10	7	3
2018/2019	UD Las Palmas	9	9	3
2018/2019	Extremadura UD	7	4	7
2018/2019	AD Alcorcón	9	6	5
2018/2019	Real Zaragoza	7	7	6
2018/2019	CD Tenerife	9	8	2
2018/2019	CD Numancia	10	5	1
2018/2019	CD Lugo	8	6	2
2018/2019	CF Rayo Majadahonda	8	6	4
2018/2019	Club Gimnàstic de Tarragona	7	6	2
2018/2019	Córdoba CF	6	7	1
2018/2019	CF Reus Deportiu	1	5	4
2018/2019	Norwich	15	4	12
2018/2019	Sheffield Utd	15	4	11
2018/2019	Leeds United	14	4	11
2018/2019	West Bromwich Albion	12	7	11
2018/2019	Aston Villa	11	8	9
2018/2019	Derby County	13	7	7
2018/2019	Middlesbrough	10	6	10
2018/2019	Bristol City	8	8	11
2018/2019	Nottingham Forest	13	4	4
2018/2019	Swansea City	12	6	6
2018/2019	Brentford	14	4	3
2018/2019	Sheffield Wednesday	10	8	6
2018/2019	Hull City	11	6	6
2018/2019	Preston North End	8	10	8
2018/2019	Blackburn Rovers	10	7	6
2018/2019	Stoke City	8	9	3
2018/2019	Birmingham City	7	11	7
2018/2019	Wigan Athletic	11	8	2
2018/2019	Queens Park Rangers	9	3	5
2018/2019	Reading	8	6	2
2018/2019	Millwall	7	9	3
2018/2019	Rotherham United	7	8	1
2018/2019	Bolton	4	4	4
2018/2019	Ipswich Town	3	11	2
2018/2019	1. FC Köln	9	3	10
2018/2019	SC Paderborn 07	10	6	6
2018/2019	1. FC Union Berlin	11	5	3
2018/2019	Hamburger SV	8	4	8
2018/2019	1. FC Heidenheim 1846	9	3	6
2018/2019	Holstein Kiel	8	5	5
2018/2019	DSC Arminia Bielefeld	8	2	5
2018/2019	SSV Jahn Regensburg	6	6	6
2018/2019	FC St. Pauli	8	5	6
2018/2019	SV Darmstadt 98	9	4	4
2018/2019	VfL Bochum	9	3	2
2018/2019	SG Dynamo Dresden	7	5	4
2018/2019	SpVgg Greuther Fürth	6	8	4
2018/2019	FC Erzgebirge Aue	6	5	5
2018/2019	SV Sandhausen	5	6	4
2018/2019	FC Ingolstadt 04	4	5	5
2018/2019	1. FC Magdeburg	2	10	4
2018/2019	MSV Duisburg	3	3	3
2018/2019	Brescia	13	3	5
2018/2019	Lecce	13	4	6
2018/2019	Palermo	8	9	8
2018/2019	Benevento	10	3	7
2018/2019	Pescara	11	5	3
2018/2019	H. Verona	8	7	5
2018/2019	Spezia	10	5	4
2018/2019	Cittadella	9	5	3
2018/2019	Perugia	9	2	5
2018/2019	Cremonese	9	6	3
2018/2019	Cosenza	7	8	4
2018/2019	Crotone	6	8	5
2018/2019	Foggia	8	8	2
2018/2019	Ascoli	7	7	3
2018/2019	Livorno	7	5	2
2018/2019	Venezia	6	8	2
2018/2019	Salernitana	8	3	2
2018/2019	Padova	3	10	2
2018/2019	Carpi	3	6	4
2018/2019	Metz	13	3	11
2018/2019	Brest	13	4	8
2018/2019	Troyes	12	1	9
2018/2019	Paris FC	10	8	7
2018/2019	Lens	11	5	7
2018/2019	Lorient	8	8	9
2018/2019	Le Havre	8	8	5
2018/2019	Orleans	7	5	8
2018/2019	Grenoble	8	5	5
2018/2019	Clermont	5	9	6
2018/2019	Chateauroux	5	8	6
2018/2019	Niort	6	9	5
2018/2019	Valenciennes	7	4	4
2018/2019	Nancy	7	2	5
2018/2019	Auxerre	6	6	4
2018/2019	Sochaux	7	3	4
2018/2019	Ajaccio	6	7	3
2018/2019	Gazelec Ajaccio	5	4	4
2018/2019	Beziers	3	9	6
2018/2019	Red Star	5	2	2
2017/2018	Rayo Vallecano	13	5	8
2017/2018	SD Huesca	13	6	8
2017/2018	Real Zaragoza	12	6	8
2017/2018	Real Sporting	15	3	6
2017/2018	Real Valladolid CF	14	3	5
2017/2018	CD Numancia	15	2	3
2017/2018	Real Oviedo	14	4	4
2017/2018	C.A. Osasuna	8	9	8
2017/2018	Cádiz CF	10	10	6
2017/2018	Granada CF	14	4	3
2017/2018	CD Tenerife	11	8	4
2017/2018	CD Lugo	10	5	5
2017/2018	AD Alcorcón	7	10	5
2017/2018	CF Reus Deportiu	7	11	5
2017/2018	Club Gimnàstic de Tarragona	7	3	8
2017/2018	Córdoba CF	10	4	5
2017/2018	Albacete BP	8	7	3
2017/2018	UD Almería	9	6	3
2017/2018	Cultural Y Deportiva Leonesa	9	8	2
2017/2018	FC Barcelona Atlètic	5	5	5
2017/2018	Lorca FC	7	6	1
2017/2018	Sevilla Atlético	5	7	2
2017/2018	Wolves	16	5	14
2017/2018	Cardiff City	16	4	11
2017/2018	Fulham	13	8	12
2017/2018	Aston Villa	14	7	10
2017/2018	Middlesbrough	14	3	8
2017/2018	Derby County	12	5	8
2017/2018	Preston North End	9	8	10
2017/2018	Millwall	12	7	7
2017/2018	Brentford	9	11	9
2017/2018	Sheffield Utd	12	5	8
2017/2018	Bristol City	11	6	6
2017/2018	Ipswich Town	9	6	8
2017/2018	Leeds United	10	6	7
2017/2018	Norwich	8	8	7
2017/2018	Sheffield Wednesday	8	7	6
2017/2018	Queens Park Rangers	12	5	3
2017/2018	Nottingham Forest	10	3	5
2017/2018	Hull City	7	8	4
2017/2018	Birmingham City	10	3	3
2017/2018	Reading	5	8	5
2017/2018	Bolton	9	4	1
2017/2018	Barnsley	5	9	4
2017/2018	Burton Albion	4	5	6
2017/2018	Sunderland	3	7	4
2017/2018	Fortuna Düsseldorf	10	4	9
2017/2018	1. FC Nürnberg	8	4	9
2017/2018	Holstein Kiel	8	7	6
2017/2018	DSC Arminia Bielefeld	7	6	5
2017/2018	SSV Jahn Regensburg	10	0	4
2017/2018	VfL Bochum	8	5	5
2017/2018	MSV Duisburg	6	5	7
2017/2018	1. FC Union Berlin	7	7	5
2017/2018	FC Ingolstadt 04	5	4	7
2017/2018	SV Darmstadt 98	6	5	4
2017/2018	SV Sandhausen	7	5	4
2017/2018	FC St. Pauli	5	8	6
2017/2018	1. FC Heidenheim 1846	9	3	2
2017/2018	SG Dynamo Dresden	5	4	6
2017/2018	SpVgg Greuther Fürth	9	4	1
2017/2018	FC Erzgebirge Aue	7	5	3
2017/2018	Eintracht Braunschweig	6	6	2
2017/2018	1. FC Kaiserslautern	4	7	5
2017/2018	Empoli	14	6	10
2017/2018	Parma	12	6	9
2017/2018	Frosinone	12	7	7
2017/2018	Palermo	11	7	7
2017/2018	Venezia	12	6	5
2017/2018	Cittadella	7	7	11
2017/2018	Bari	13	5	5
2017/2018	Perugia	11	4	5
2017/2018	Foggia	8	6	8
2017/2018	Spezia	10	7	3
2017/2018	Carpi	8	9	4
2017/2018	Salernitana	7	9	4
2017/2018	Cesena	9	9	2
2017/2018	Cremonese	6	9	3
2017/2018	Avellino	8	7	3
2017/2018	Brescia	6	9	5
2017/2018	Pescara	7	7	4
2017/2018	Ascoli	6	8	5
2017/2018	Virtus Entella	6	7	4
2017/2018	Novara	5	6	5
2017/2018	Pro Vercelli	6	8	3
2017/2018	Ternana	5	10	2
2017/2018	Reims	14	2	14
2017/2018	Nimes	12	3	10
2017/2018	Ajaccio	14	2	6
2017/2018	Le Havre	13	5	6
2017/2018	Brest	9	5	9
2017/2018	Clermont	10	6	7
2017/2018	Lorient	11	5	7
2017/2018	Paris FC	10	5	6
2017/2018	Chateauroux	10	5	7
2017/2018	Sochaux	10	2	5
2017/2018	Auxerre	7	6	6
2017/2018	Orleans	7	6	5
2017/2018	Valenciennes	5	7	7
2017/2018	Lens	8	3	3
2017/2018	Niort	6	5	5
2017/2018	Gazelec Ajaccio	8	5	3
2017/2018	Nancy	7	6	2
2017/2018	Bourg-en-Bresse	7	4	3
2017/2018	Quevilly	5	2	4
2017/2018	Tours	4	3	1
2016/2017	Levante UD	17	3	8
2016/2017	Girona FC	12	6	8
2016/2017	Getafe CF	13	7	5
2016/2017	CD Tenerife	10	9	6
2016/2017	Cádiz CF	10	8	6
2016/2017	SD Huesca	11	5	5
2016/2017	Real Valladolid CF	12	5	6
2016/2017	Real Oviedo	13	5	4
2016/2017	CD Lugo	11	3	3
2016/2017	Córdoba CF	10	6	4
2016/2017	CF Reus Deportiu	7	9	6
2016/2017	Rayo Vallecano	10	7	4
2016/2017	Sevilla Atlético	9	9	4
2016/2017	Club Gimnàstic de Tarragona	7	9	5
2016/2017	UD Almería	11	6	3
2016/2017	Real Zaragoza	8	6	4
2016/2017	CD Numancia	8	7	3
2016/2017	AD Alcorcón	10	5	3
2016/2017	UCAM Murcia	7	6	4
2016/2017	RCD Mallorca	7	11	2
2016/2017	Elche C.F.	6	7	5
2016/2017	CD Mirandés	6	7	3
2016/2017	Newcastle	15	3	14
2016/2017	Brighton	17	3	11
2016/2017	Reading	16	5	10
2016/2017	Sheffield Wednesday	15	2	9
2016/2017	Huddersfield Town	15	2	10
2016/2017	Fulham	10	8	12
2016/2017	Leeds United	14	4	8
2016/2017	Norwich	15	4	5
2016/2017	Derby County	11	8	7
2016/2017	Brentford	11	5	7
2016/2017	Preston North End	11	6	5
2016/2017	Cardiff City	11	4	6
2016/2017	Aston Villa	12	8	4
2016/2017	Barnsley	6	11	9
2016/2017	Wolves	8	4	8
2016/2017	Ipswich Town	8	10	5
2016/2017	Bristol City	11	4	4
2016/2017	Queens Park Rangers	9	4	6
2016/2017	Birmingham City	8	5	5
2016/2017	Burton Albion	9	4	4
2016/2017	Nottingham Forest	12	4	2
2016/2017	Blackburn Rovers	8	8	4
2016/2017	Wigan Athletic	5	8	5
2016/2017	Rotherham United	5	6	0
2016/2017	VfB Stuttgart	13	2	8
2016/2017	Hannover 96	14	2	5
2016/2017	Eintracht Braunschweig	13	3	6
2016/2017	1. FC Union Berlin	11	3	7
2016/2017	SG Dynamo Dresden	6	8	7
2016/2017	1. FC Heidenheim 1846	7	5	5
2016/2017	FC St. Pauli	5	7	7
2016/2017	SpVgg Greuther Fürth	9	2	3
2016/2017	VfL Bochum	7	8	3
2016/2017	SV Sandhausen	6	6	4
2016/2017	Fortuna Düsseldorf	4	7	6
2016/2017	1. FC Nürnberg	6	3	6
2016/2017	1. FC Kaiserslautern	8	5	2
2016/2017	FC Erzgebirge Aue	7	4	3
2016/2017	DSC Arminia Bielefeld	7	6	1
2016/2017	TSV 1860 München	7	4	3
2016/2017	FC Würzburger Kickers	4	8	3
2016/2017	Karlsruher SC	3	5	2
2016/2017	SPAL	14	5	8
2016/2017	H. Verona	12	7	8
2016/2017	Frosinone	14	4	7
2016/2017	Perugia	8	11	7
2016/2017	Benevento	13	6	5
2016/2017	Cittadella	13	2	6
2016/2017	Carpi	9	9	7
2016/2017	Spezia	11	7	4
2016/2017	Novara	10	6	5
2016/2017	Salernitana	9	8	4
2016/2017	Virtus Entella	12	5	1
2016/2017	Bari	11	6	2
2016/2017	Cesena	8	10	4
2016/2017	Avellino	10	7	3
2016/2017	Brescia	9	9	2
2016/2017	Ascoli	5	10	5
2016/2017	Pro Vercelli	7	9	3
2016/2017	Ternana	10	4	3
2016/2017	Trapani	7	8	3
2016/2017	Vicenza	4	9	5
2016/2017	Pisa	5	8	1
2016/2017	Latina	3	12	3
2016/2017	Strasbourg	14	2	5
2016/2017	Troyes	13	4	6
2016/2017	Amiens	10	4	9
2016/2017	Brest	10	2	9
2016/2017	Lens	9	6	9
2016/2017	Nimes	6	9	11
2016/2017	Reims	9	5	5
2016/2017	Le Havre	8	6	6
2016/2017	Gazelec Ajaccio	7	8	6
2016/2017	Niort	8	6	4
2016/2017	Ajaccio	11	4	2
2016/2017	Sochaux	5	8	6
2016/2017	Clermont	5	7	6
2016/2017	Valenciennes	7	8	3
2016/2017	Bourg-en-Bresse	6	6	5
2016/2017	Tours	6	5	4
2016/2017	Auxerre	6	4	5
2016/2017	Orleans	8	7	3
2016/2017	Red Star	5	6	3
2016/2017	Laval	3	8	2
2015/2016	D. Alavés	11	8	10
2015/2016	CD Leganés	12	7	8
2015/2016	Club Gimnàstic de Tarragona	11	8	7
2015/2016	Girona FC	9	8	8
2015/2016	Cordoba CF	10	3	9
2015/2016	CA Osasuna	9	9	8
2015/2016	AD Alcorcón	12	6	6
2015/2016	Real Zaragoza	13	2	4
2015/2016	Real Oviedo	12	4	4
2015/2016	CD Numancia	9	9	4
2015/2016	Elche C.F.	8	11	5
2015/2016	SD Huesca	7	5	7
2015/2016	CD Tenerife	8	10	5
2015/2016	CD Lugo	9	6	4
2015/2016	CD Mirandés	7	7	6
2015/2016	Real Valladolid CF	7	8	5
2015/2016	RCD Mallorca	9	8	3
2015/2016	UD Almería	9	6	1
2015/2016	SD Ponferradina	11	4	1
2015/2016	Llagostera	12	4	0
2015/2016	Albacete BP	8	5	2
2015/2016	Athletic Club B	6	6	2
2015/2016	Burnley	15	6	11
2015/2016	Middlesbrough	16	5	10
2015/2016	Brighton	15	5	9
2015/2016	Hull City	15	7	9
2015/2016	Derby County	12	7	9
2015/2016	Sheffield Wednesday	13	8	6
2015/2016	Ipswich Town	9	8	9
2015/2016	Cardiff City	12	9	5
2015/2016	Brentford	10	4	9
2015/2016	Birmingham City	9	5	7
2015/2016	Preston North End	7	10	8
2015/2016	Queens Park Rangers	10	9	4
2015/2016	Leeds United	7	8	7
2015/2016	Wolves	7	10	7
2015/2016	Blackburn Rovers	8	8	5
2015/2016	Nottingham Forest	7	8	6
2015/2016	Reading	8	9	5
2015/2016	Bristol City	7	7	6
2015/2016	Huddersfield Town	7	6	6
2015/2016	Fulham	8	5	4
2015/2016	Rotherham United	8	6	5
2015/2016	Charlton	5	8	4
2015/2016	Milton Keynes Dons	7	3	2
2015/2016	Bolton	5	11	0
2015/2016	Sport-Club Freiburg	13	2	9
2015/2016	RB Leipzig	11	3	9
2015/2016	1. FC Nürnberg	11	5	8
2015/2016	FC St. Pauli	9	2	6
2015/2016	VfL Bochum	7	7	6
2015/2016	1. FC Union Berlin	9	6	4
2015/2016	Karlsruher SC	7	7	5
2015/2016	Eintracht Braunschweig	7	6	5
2015/2016	SpVgg Greuther Fürth	8	2	5
2015/2016	1. FC Kaiserslautern	5	6	7
2015/2016	1. FC Heidenheim 1846	6	6	5
2015/2016	DSC Arminia Bielefeld	4	8	4
2015/2016	SV Sandhausen	6	5	6
2015/2016	Fortuna Düsseldorf	6	3	3
2015/2016	TSV 1860 München	6	5	2
2015/2016	MSV Duisburg	6	5	1
2015/2016	FSV Frankfurt	4	1	4
2015/2016	SC Paderborn 07	2	7	4
2015/2016	Cagliari	15	3	10
2015/2016	Crotone	15	5	8
2015/2016	Trapani	11	7	9
2015/2016	Pescara	13	5	8
2015/2016	Bari	11	6	8
2015/2016	Cesena	16	2	3
2015/2016	Spezia	10	7	7
2015/2016	Novara	12	5	7
2015/2016	Virtus Entella	12	7	5
2015/2016	Perugia	8	7	6
2015/2016	Brescia	11	7	3
2015/2016	Ternana	9	5	6
2015/2016	Vicenza	5	10	6
2015/2016	Avellino	8	5	5
2015/2016	Ascoli	9	4	4
2015/2016	Latina	8	7	2
2015/2016	Pro Vercelli	7	6	4
2015/2016	Salernitana	8	7	1
2015/2016	Lanciano	10	5	2
2015/2016	Livorno	6	10	4
2015/2016	Modena	10	4	1
2015/2016	Como	3	10	2
2015/2016	Nancy	14	3	7
2015/2016	Dijon	12	4	8
2015/2016	Metz	11	4	8
2015/2016	Le Havre	12	3	7
2015/2016	Red Star	8	4	10
2015/2016	Lens	9	7	6
2015/2016	Clermont	11	3	5
2015/2016	Auxerre	9	5	6
2015/2016	Tours	7	5	4
2015/2016	Brest	8	7	4
2015/2016	Bourg-en-Bresse	10	3	3
2015/2016	Valenciennes	3	11	7
2015/2016	Laval	7	6	2
2015/2016	Nimes	8	9	5
2015/2016	Sochaux	6	7	3
2015/2016	Niort	4	9	4
2015/2016	Ajaccio	8	7	1
2015/2016	Evian	5	7	4
2015/2016	Creteil	3	7	5
2015/2016	Paris FC	2	11	2
2014/2015	Real Betis	14	3	11
2014/2015	Real Sporting	14	6	7
2014/2015	Girona FC	11	7	13
2014/2015	UD Las Palmas	15	4	7
2014/2015	Real Valladolid CF	12	5	9
2014/2015	Real Zaragoza	10	7	5
2014/2015	SD Ponferradina	11	7	5
2014/2015	CD Mirandés	10	6	6
2014/2015	Llagostera	8	5	7
2014/2015	CD Leganés	10	8	5
2014/2015	AD Alcorcón	7	9	5
2014/2015	CD Numancia	7	8	5
2014/2015	D. Alavés	10	5	4
2014/2015	Albacete BP	9	5	5
2014/2015	CD Lugo	9	9	2
2014/2015	RCD Mallorca	9	4	4
2014/2015	CD Tenerife	9	9	2
2014/2015	CA Osasuna	9	5	2
2014/2015	Racing Santander	6	4	6
2014/2015	Huelva	7	7	3
2014/2015	CE Sabadell	7	7	1
2014/2015	FC Barcellona B	5	5	4
2014/2015	AFC Bournemouth	13	7	13
2014/2015	Watford	14	4	13
2014/2015	Norwich	12	6	13
2014/2015	Middlesbrough	15	5	10
2014/2015	Brentford	12	6	11
2014/2015	Ipswich Town	15	5	7
2014/2015	Wolves	13	6	9
2014/2015	Derby County	12	7	9
2014/2015	Blackburn Rovers	11	6	6
2014/2015	Birmingham City	10	7	6
2014/2015	Cardiff City	10	5	6
2014/2015	Charlton	9	9	5
2014/2015	Sheffield Wednesday	5	11	9
2014/2015	Nottingham Forest	9	5	6
2014/2015	Leeds United	8	6	7
2014/2015	Huddersfield Town	8	8	5
2014/2015	Fulham	9	5	5
2014/2015	Bolton	9	8	4
2014/2015	Reading	8	5	5
2014/2015	Brighton	6	8	4
2014/2015	Rotherham United	8	7	3
2014/2015	Millwall	5	7	4
2014/2015	Wigan Athletic	3	8	6
2014/2015	Blackpool	4	7	0
2014/2015	FC Ingolstadt 04	10	5	7
2014/2015	SV Darmstadt 98	11	5	4
2014/2015	Karlsruher SC	7	8	8
2014/2015	1. FC Kaiserslautern	11	5	3
2014/2015	RB Leipzig	10	4	3
2014/2015	Eintracht Braunschweig	9	4	6
2014/2015	1. FC Union Berlin	8	5	4
2014/2015	1. FC Heidenheim 1846	8	4	4
2014/2015	1. FC Nürnberg	9	4	4
2014/2015	Fortuna Düsseldorf	4	7	7
2014/2015	VfL Bochum	4	10	5
2014/2015	SV Sandhausen	4	8	6
2014/2015	FSV Frankfurt	3	7	7
2014/2015	SpVgg Greuther Fürth	6	5	2
2014/2015	FC St. Pauli	8	3	2
2014/2015	TSV 1860 München	4	4	5
2014/2015	FC Erzgebirge Aue	6	3	3
2014/2015	VFR Aalen 1921	5	6	2
2014/2015	Carpi	12	7	10
2014/2015	Frosinone	14	6	6
2014/2015	Vicenza	11	7	7
2014/2015	Bologna	9	9	8
2014/2015	Spezia	11	7	7
2014/2015	Perugia	11	9	5
2014/2015	Pescara	8	8	8
2014/2015	Avellino	11	6	4
2014/2015	Livorno	11	6	4
2014/2015	Bari	10	6	4
2014/2015	Trapani	12	8	1
2014/2015	Ternana	6	5	7
2014/2015	Latina	8	7	3
2014/2015	Lanciano	8	8	2
2014/2015	Pro Vercelli	9	10	3
2014/2015	Crotone	10	6	2
2014/2015	Modena	7	9	3
2014/2015	Virtus Entella	8	7	2
2014/2015	Cittadella	5	7	4
2014/2015	Brescia	8	7	4
2014/2015	Catania	10	7	2
2014/2015	Varese	7	6	2
2014/2015	Troyes	14	4	10
2014/2015	Gazelec Ajaccio	13	4	5
2014/2015	Angers	12	5	6
2014/2015	Dijon	11	4	6
2014/2015	Nancy	9	7	6
2014/2015	Brest	11	7	3
2014/2015	Le Havre	10	6	4
2014/2015	Laval	8	9	3
2014/2015	Auxerre	6	7	6
2014/2015	Sochaux	7	6	6
2014/2015	Niort	7	8	4
2014/2015	Clermont	8	8	4
2014/2015	Nimes	7	7	5
2014/2015	Creteil	7	8	3
2014/2015	Tours	7	5	5
2014/2015	Valenciennes	6	6	4
2014/2015	Ajaccio	7	5	2
2014/2015	Orleans	5	8	4
2014/2015	Chateauroux	5	7	2
2014/2015	Arles	6	4	1
